# Supplementary material for: Mutually Isomeric 2- and 4-(3-Nitro-1,2,4-triazol-1-yl)pyrimidines Inspired by an Antimycobacterial Screening Hit: Synthesis and Biological Activity against the ESKAPE Panel of Pathogens
Source: PubMed Central journal article supplement (PMC7601023; doi:10.3390/antibiotics9100666), 2020-10-01

## *Supporting information for*

# **Mutually isomeric 2- and 4-(3-nitro-1,2,4-triazol-1-yl)pyrimidines inspired by an antimycobacterial screening hit: synthesis and biological activity against the ESKAPE panel of pathogens**

Sergey Chuprun,<sup>a</sup> Dmitry Dar'in,<sup>a</sup> Elizaveta Rogacheva,<sup>b</sup> Liudmila Kraeva,<sup>b</sup> Oleg Levin,<sup>a</sup>  
Olga Manicheva,<sup>c</sup> Marine Dogonadze,<sup>c</sup> Tatiana Vinogradova,<sup>c</sup> Olga Bakulina,<sup>a</sup> and  
Mikhail Krasavin<sup>a,d\*</sup>

<sup>a</sup>Saint Petersburg State University, Saint Petersburg 199034 Russian Federation

<sup>b</sup>Pasteur Institute of Epidemiology and Microbiology, 14 Mira Street, Saint Petersburg  
197101 Russian Federation

<sup>c</sup>Saint Petersburg Research Institute of Phthisiopulmonology, 2-4 Ligovsky Prospekt,  
Saint Petersburg, 191036, Russian Federation

<sup>d</sup>Immanuel Kant Baltic Federal University, Kaliningrad 236016 Russian Federation

\*Corresponding author. Tel.: +7 931 3617872; fax: +7 812 428 6939. E-mail address:  
m.krasavin@spbu.ru (M. Krasavin).

## **Table of Contents**

|                                                                                               |    |
|-----------------------------------------------------------------------------------------------|----|
| Crystallographic data for compounds 1e, 2h,k,n,o and 5 .....                                  | S2 |
| References .....                                                                              | S6 |
| Copies of <sup>1</sup> H and <sup>13</sup> C NMR spectra of compounds 1a-s,2a-s,4 and 5 ..... | S7 |

## Crystallographic data for compounds **1e**, **2h**, **k**, **n**, **o** and **5**

Suitable crystals of **2o**, **2k**, **2n**, and **5** were studied using Xcalibur, Eos diffractometer (monochromated MoK $\alpha$  radiation,  $\lambda = 0.71073$  Å). Suitable crystals of **2h** and **1e** were studied using SuperNova, Dual, Cu at zero, Atlas diffractometer (monochromated CuK $\alpha$  radiation,  $\lambda = 1.542$  Å). In all cases apart from **2n**, the temperature was kept at 100(2) K, whereas in the case of **2n**, the temperature was kept at 200(2) K. In each case the structure has been solved with the ShelXT [1] structure solution program using Intrinsic Phasing and refined with the ShelXL [1] refinement package incorporated in the OLEX2 program package [2] using Least Squares minimization. Empirical absorption correction was applied in CrysAlisPro [3] program complex using spherical harmonics, implemented in SCALE3 ABSPACK scaling algorithm.

**Table S1.** Crystal data and structure refinement for **1e**, **5**

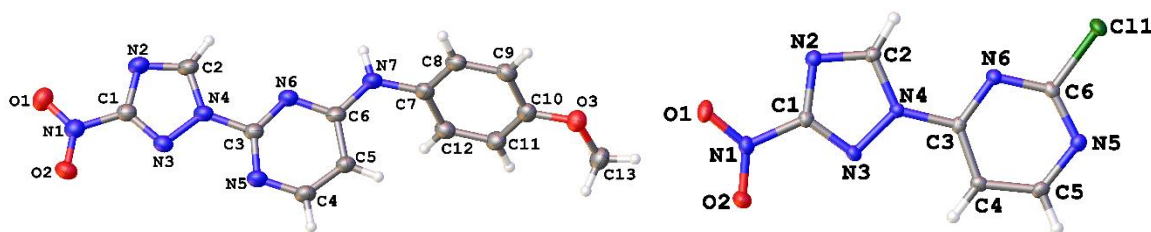

| Identification code                    | <b>1e</b>                                                     | <b>5</b>                                                      |
|----------------------------------------|---------------------------------------------------------------|---------------------------------------------------------------|
| Empirical formula                      | C <sub>13</sub> H <sub>11</sub> N <sub>7</sub> O <sub>3</sub> | C <sub>6</sub> H <sub>3</sub> ClN <sub>6</sub> O <sub>2</sub> |
| Formula weight                         | 313.29                                                        | 226.59                                                        |
| Temperature/K                          | 100(2)                                                        | 100(2)                                                        |
| Crystal system                         | orthorhombic                                                  | monoclinic                                                    |
| Space group                            | Pbca                                                          | P2 <sub>1</sub> /c                                            |
| a/Å                                    | 11.5561(9)                                                    | 12.8957(3)                                                    |
| b/Å                                    | 6.9509(7)                                                     | 11.5155(3)                                                    |
| c/Å                                    | 34.027(4)                                                     | 11.5580(3)                                                    |
| $\alpha$ /°                            | 90                                                            | 90                                                            |
| $\beta$ /°                             | 90                                                            | 90.988(2)                                                     |
| $\gamma$ /°                            | 90                                                            | 90                                                            |
| Volume/Å <sup>3</sup>                  | 2733.2(5)                                                     | 1716.11(7)                                                    |
| Z                                      | 8                                                             | 8                                                             |
| $\rho_{\text{calc}}$ /cm <sup>3</sup>  | 1.523                                                         | 1.754                                                         |
| $\mu$ /mm <sup>-1</sup>                | 0.966                                                         | 0.434                                                         |
| F(000)                                 | 1296.0                                                        | 912.0                                                         |
| Crystal size/mm <sup>3</sup>           | 0.18 × 0.09 × 0.08                                            | 0.21 × 0.20 × 0.16                                            |
| Radiation                              | Cu K $\alpha$ ( $\lambda = 1.54184$ )                         | Mo K $\alpha$ ( $\lambda = 0.7107$ )                          |
| 2 $\Theta$ range for data collection/° | 9.252 to 152.326                                              | 5.878 to 56.992                                               |
| Index ranges                           | -14 ≤ h ≤ 14, -4 ≤ k ≤ 8, -40 ≤ l ≤ 42                        | -17 ≤ h ≤ 17, -15 ≤ k ≤ 15, -15 ≤ l ≤ 15                      |

|                                                     |                                                                  |                                                                  |
|-----------------------------------------------------|------------------------------------------------------------------|------------------------------------------------------------------|
| Reflections collected                               | 11128                                                            | 17415                                                            |
| Independent reflections                             | 2821 [ $R_{\text{int}} = 0.0742$ , $R_{\text{sigma}} = 0.0454$ ] | 4347 [ $R_{\text{int}} = 0.0310$ , $R_{\text{sigma}} = 0.0280$ ] |
| Data/restraints/parameters                          | 2821/0/209                                                       | 4347/0/271                                                       |
| Goodness-of-fit on $F^2$                            | 1.040                                                            | 1.025                                                            |
| Final R indexes [ $I \geq 2\sigma(I)$ ]             | $R_1 = 0.0706$ , $wR_2 = 0.1827$                                 | $R_1 = 0.0298$ , $wR_2 = 0.0713$                                 |
| Final R indexes [all data]                          | $R_1 = 0.0840$ , $wR_2 = 0.1941$                                 | $R_1 = 0.0369$ , $wR_2 = 0.0760$                                 |
| Largest diff. peak/hole / $e \cdot \text{\AA}^{-3}$ | 0.34/-0.31                                                       | 0.40/-0.28                                                       |
| CCDC                                                | 1582454                                                          | 1582455                                                          |

Table S2. Crystal data and structure refinement for **2o**, **2k**

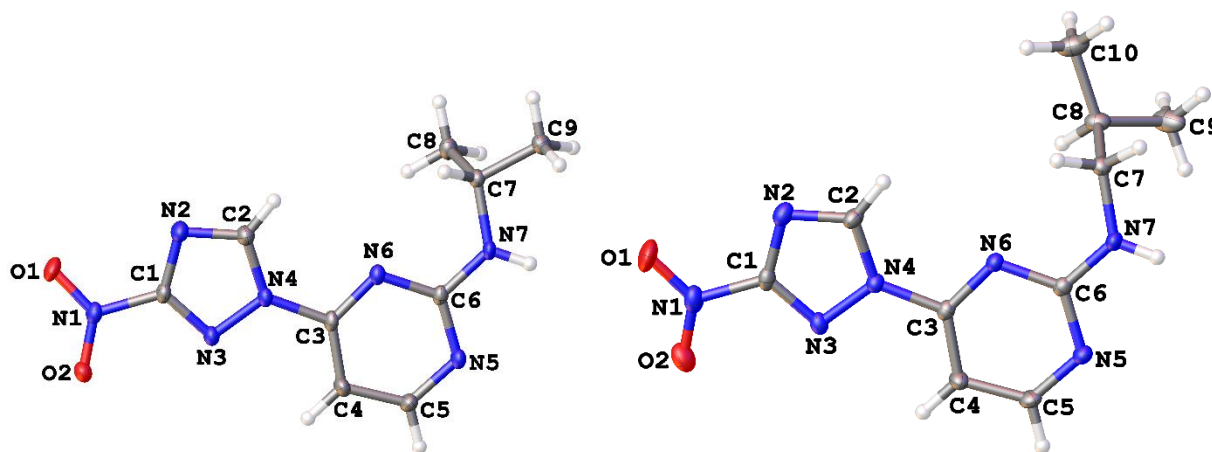

| Identification code                   | <b>2o</b>                      | <b>2k</b>                      |
|---------------------------------------|--------------------------------|--------------------------------|
| Empirical formula                     | $C_9H_{11}N_7O_2$              | $C_{10}H_{13}N_7O_2$           |
| Formula weight                        | 249.25                         | 263.27                         |
| Temperature/K                         | 100(2)                         | 100(2)                         |
| Crystal system                        | monoclinic                     | monoclinic                     |
| Space group                           | $P2_1/c$                       | $I2/a$                         |
| $a/\text{\AA}$                        | 17.1962(6)                     | 25.0022(15)                    |
| $b/\text{\AA}$                        | 11.4000(5)                     | 5.6435(3)                      |
| $c/\text{\AA}$                        | 22.8966(6)                     | 18.6084(7)                     |
| $\alpha/^\circ$                       | 90                             | 90                             |
| $\beta/^\circ$                        | 94.205(3)                      | 99.093(5)                      |
| $\gamma/^\circ$                       | 90                             | 90                             |
| Volume/ $\text{\AA}^3$                | 4476.5(3)                      | 2592.6(2)                      |
| Z                                     | 16                             | 8                              |
| $\rho_{\text{calc}}/\text{g cm}^{-3}$ | 1.479                          | 1.349                          |
| $\mu/\text{mm}^{-1}$                  | 0.112                          | 0.100                          |
| $F(000)$                              | 2080.0                         | 1104.0                         |
| Crystal size/ $\text{mm}^3$           | $0.23 \times 0.18 \times 0.16$ | $0.20 \times 0.11 \times 0.08$ |

|                                                     |                                                                   |                                                                  |
|-----------------------------------------------------|-------------------------------------------------------------------|------------------------------------------------------------------|
| Radiation                                           | Mo K $\alpha$ ( $\lambda$ = 0.7107)                               | Mo K $\alpha$ ( $\lambda$ = 0.7107)                              |
| 2 $\Theta$ range for data collection/ $^{\circ}$    | 5.468 to 56.996                                                   | 5.932 to 56.998                                                  |
| Index ranges                                        | $-23 \leq h \leq 23$ , $-15 \leq k \leq 9$ , $-17 \leq l \leq 30$ | $-33 \leq h \leq 32$ , $-6 \leq k \leq 7$ , $-24 \leq l \leq 20$ |
| Reflections collected                               | 26644                                                             | 7489                                                             |
| Independent reflections                             | 11339 [ $R_{\text{int}} = 0.0298$ , $R_{\text{sigma}} = 0.0425$ ] | 3274 [ $R_{\text{int}} = 0.0270$ , $R_{\text{sigma}} = 0.0430$ ] |
| Data/restraints/parameters                          | 11339/0/657                                                       | 3274/0/174                                                       |
| Goodness-of-fit on $F^2$                            | 1.042                                                             | 1.038                                                            |
| Final R indexes [ $I \geq 2\sigma(I)$ ]             | $R_1 = 0.0467$ , $wR_2 = 0.1018$                                  | $R_1 = 0.0450$ , $wR_2 = 0.0955$                                 |
| Final R indexes [all data]                          | $R_1 = 0.0741$ , $wR_2 = 0.1152$                                  | $R_1 = 0.0696$ , $wR_2 = 0.1052$                                 |
| Largest diff. peak/hole / $e \cdot \text{\AA}^{-3}$ | 0.32/-0.34                                                        | 0.24/-0.20                                                       |
| CCDC                                                | 1582439                                                           | 1582440                                                          |

Table S3. Crystal data and structure refinement for **2n**, **2h**

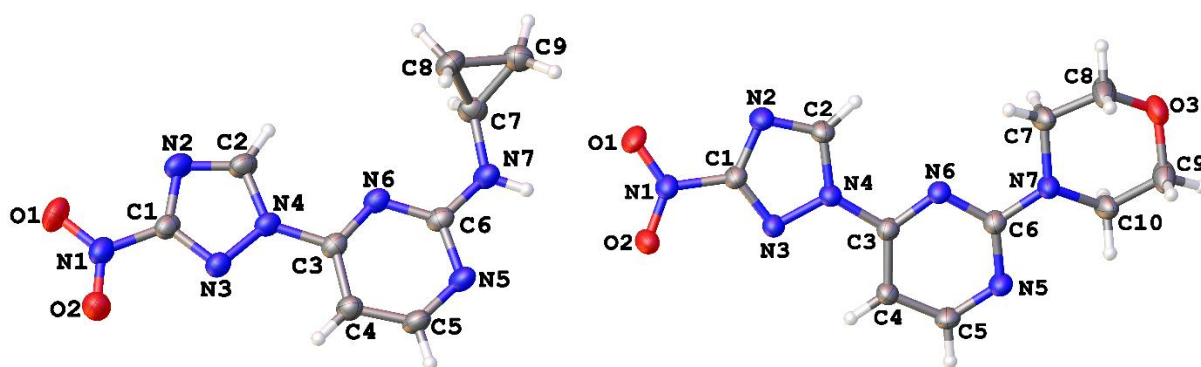

| Identification code              | <b>2n</b>                                                   | <b>2h</b>                                                     |
|----------------------------------|-------------------------------------------------------------|---------------------------------------------------------------|
| Empirical formula                | C <sub>9</sub> H <sub>9</sub> N <sub>7</sub> O <sub>2</sub> | C <sub>10</sub> H <sub>11</sub> N <sub>7</sub> O <sub>3</sub> |
| Formula weight                   | 247.23                                                      | 277.26                                                        |
| Temperature/K                    | 200(2)                                                      | 100(2)                                                        |
| Crystal system                   | triclinic                                                   | triclinic                                                     |
| Space group                      | P-1                                                         | P-1                                                           |
| a/ $\text{\AA}$                  | 7.8740(6)                                                   | 8.5133(5)                                                     |
| b/ $\text{\AA}$                  | 8.5556(6)                                                   | 8.8429(4)                                                     |
| c/ $\text{\AA}$                  | 9.2299(6)                                                   | 16.4034(6)                                                    |
| $\alpha/^\circ$                  | 77.309(5)                                                   | 97.654(3)                                                     |
| $\beta/^\circ$                   | 72.904(6)                                                   | 97.519(4)                                                     |
| $\gamma/^\circ$                  | 66.902(7)                                                   | 97.057(4)                                                     |
| Volume/ $\text{\AA}^3$           | 542.81(7)                                                   | 1200.93(10)                                                   |
| Z                                | 2                                                           | 4                                                             |
| $\rho_{\text{calc}}/\text{cm}^3$ | 1.513                                                       | 1.533                                                         |
| $\mu/\text{mm}^{-1}$             | 0.115                                                       | 1.009                                                         |
| F(000)                           | 256.0                                                       | 576.0                                                         |

|                                                    |                                                                        |                                                                        |
|----------------------------------------------------|------------------------------------------------------------------------|------------------------------------------------------------------------|
| Crystal size/mm <sup>3</sup>                       | 0.18 × 0.11 × 0.07                                                     | 0.24 × 0.14 × 0.11                                                     |
| Radiation                                          | Mo K $\alpha$ ( $\lambda$ = 0.7107)                                    | Cu K $\alpha$ ( $\lambda$ = 1.54184)                                   |
| 2 $\Theta$ range for data collection/ $^{\circ}$   | 5.782 to 56.998                                                        | 10.198 to 152.69                                                       |
| Index ranges                                       | -10 $\leq$ h $\leq$ 10, -11 $\leq$ k $\leq$ 11, -12 $\leq$ l $\leq$ 12 | -10 $\leq$ h $\leq$ 10, -10 $\leq$ k $\leq$ 10, -18 $\leq$ l $\leq$ 20 |
| Reflections collected                              | 9450                                                                   | 10191                                                                  |
| Independent reflections                            | 2753 [R <sub>int</sub> = 0.0252, R <sub>sigma</sub> = 0.0250]          | 4905 [R <sub>int</sub> = 0.0323, R <sub>sigma</sub> = 0.0393]          |
| Data/restraints/parameters                         | 2753/0/163                                                             | 4905/40/397                                                            |
| Goodness-of-fit on F <sup>2</sup>                  | 1.037                                                                  | 1.051                                                                  |
| Final R indexes [ $I \geq 2\sigma(I)$ ]            | R <sub>1</sub> = 0.0387, wR <sub>2</sub> = 0.0993                      | R <sub>1</sub> = 0.0572, wR <sub>2</sub> = 0.1548                      |
| Final R indexes [all data]                         | R <sub>1</sub> = 0.0506, wR <sub>2</sub> = 0.1085                      | R <sub>1</sub> = 0.0726, wR <sub>2</sub> = 0.1686                      |
| Largest diff. peak/hole / e $\cdot\text{\AA}^{-3}$ | 0.22/-0.25                                                             | 0.41/-0.45                                                             |
| CCDC                                               | 1582442                                                                | 1582450                                                                |

## References

1. Sheldrick, G. M. *Acta Crystallographica Section C* 2015, 71, 3–8.
2. O. V. Dolomanov, L. J. Bourhis, R. J. Gildea, J. A. K. Howard and H. Puschmann, *J. Appl. Cryst.*, 2009, 42, 339–341.
3. CrysAlisPro, Agilent Technologies Ltd., Version 1.171.136.120 (release 127-106-2012).

# Copies of $^1\text{H}$ and $^{13}\text{C}$ NMR spectra of compounds 1a-s, 2a-s, 4 and 5

## $^1\text{H}$ and $^{13}\text{C}$ NMR of 2,4-bis(3-nitro-1H-1,2,4-triazol-1-yl)pyrimidine (4)

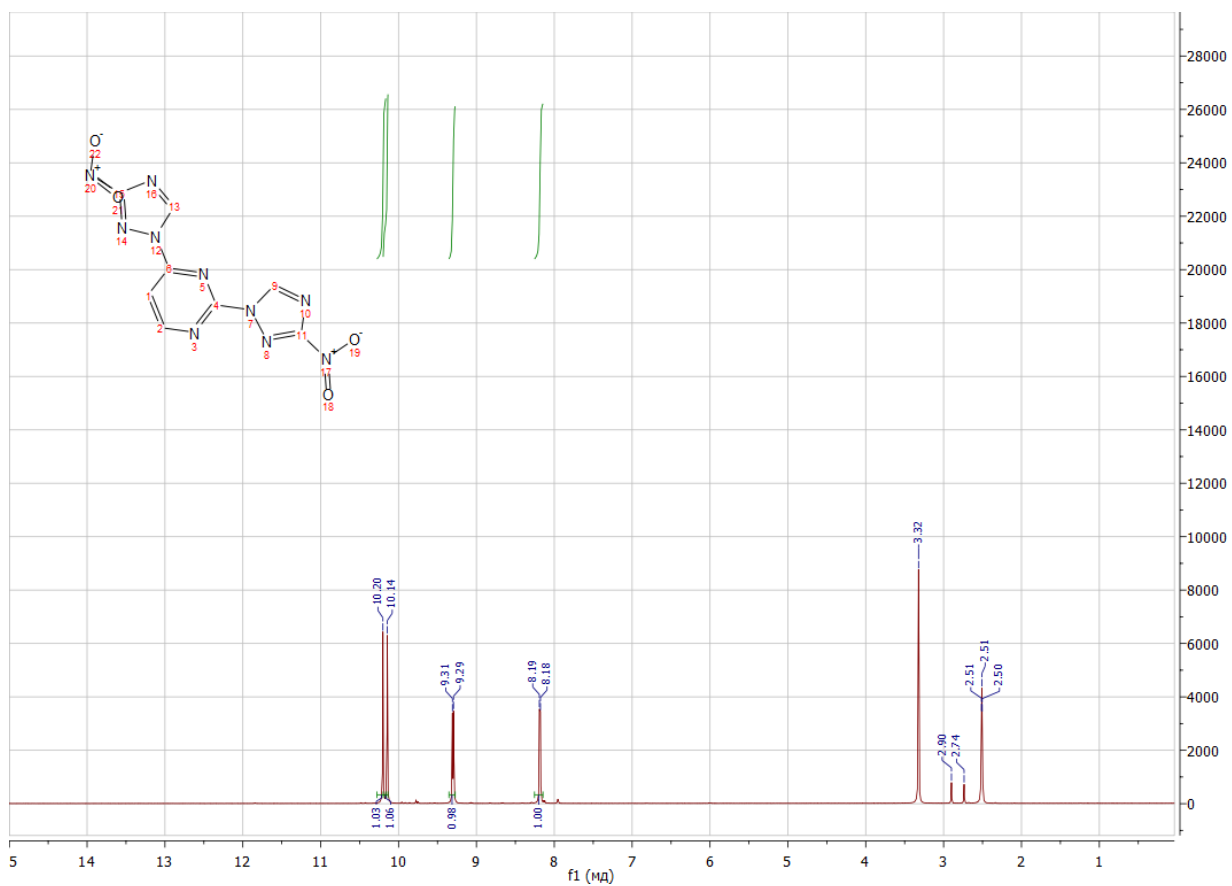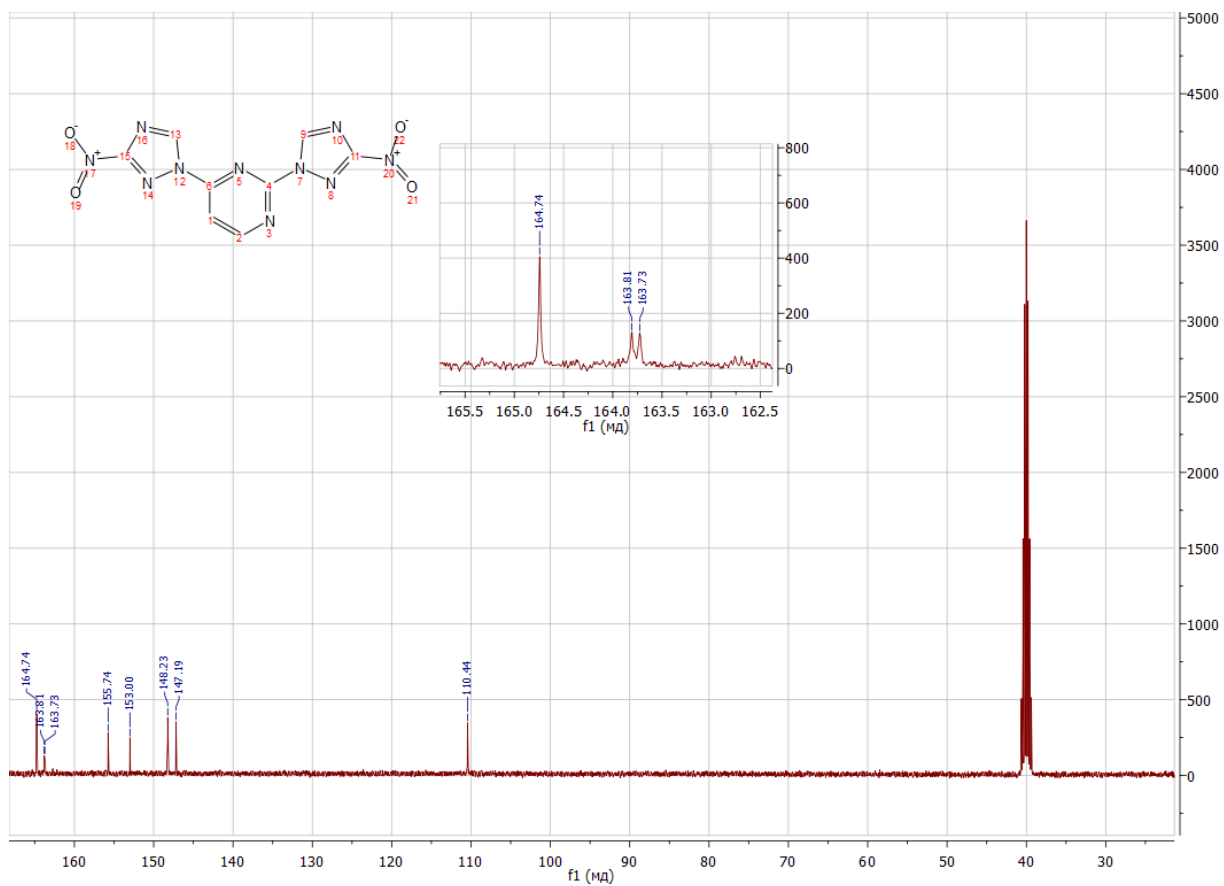

**<sup>1</sup>H and <sup>13</sup>C NMR of 2-((2-(3-nitro-1H-1,2,4-triazol-1-yl)pyrimidin-4-yl)amino)ethan-1-ol (1a)**

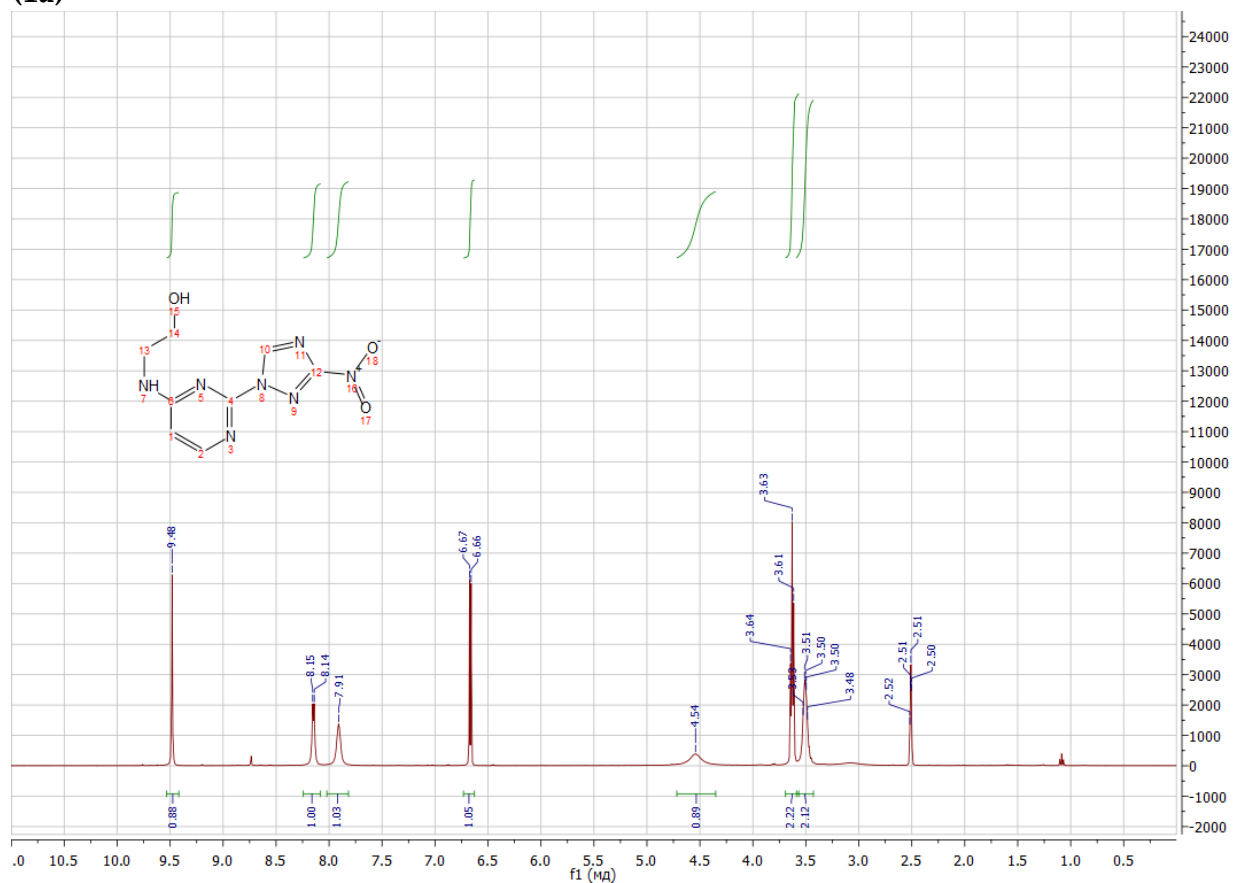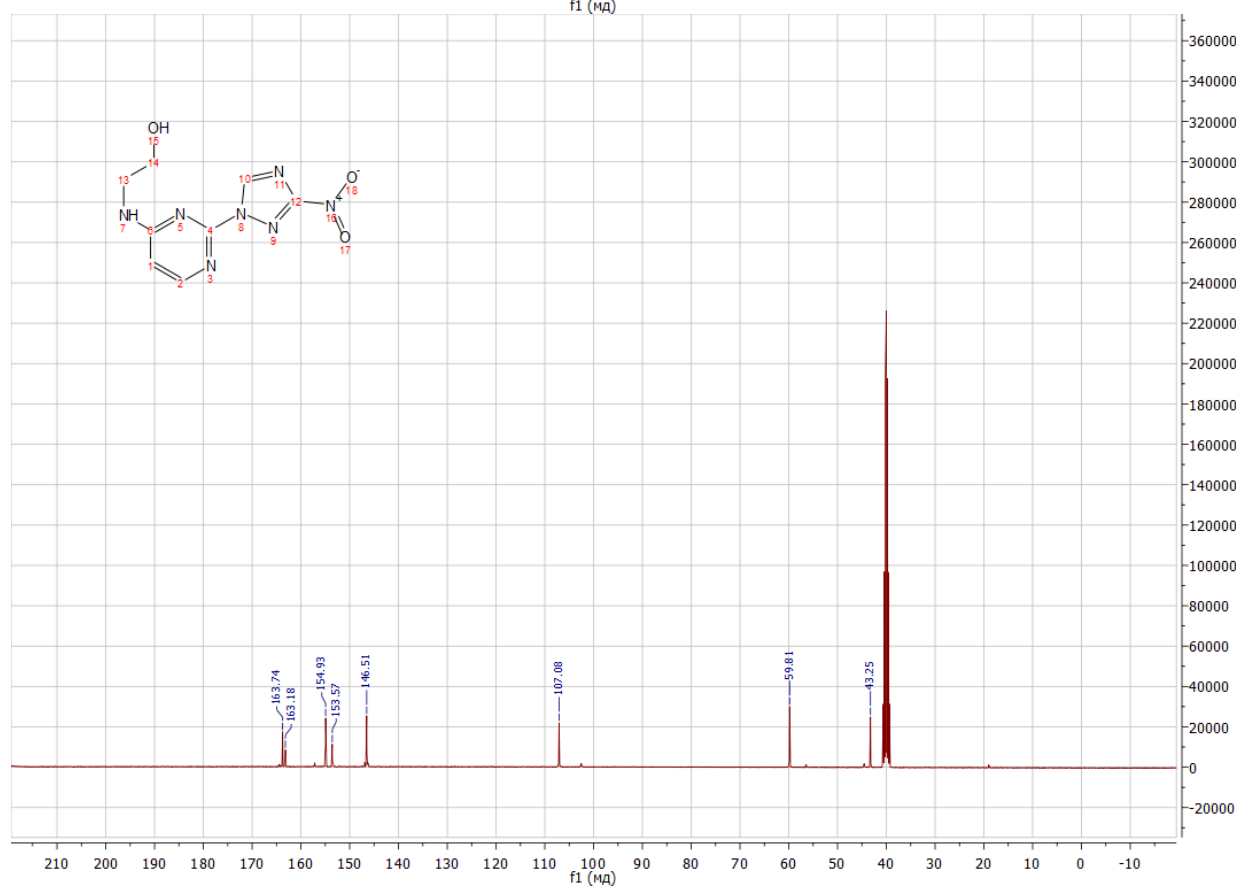



**<sup>1</sup>H and <sup>13</sup>C NMR of *N,N*-dimethyl-2-(3-nitro-1*H*-1,2,4-triazol-1-yl)pyrimidin-4-amine (1b)**

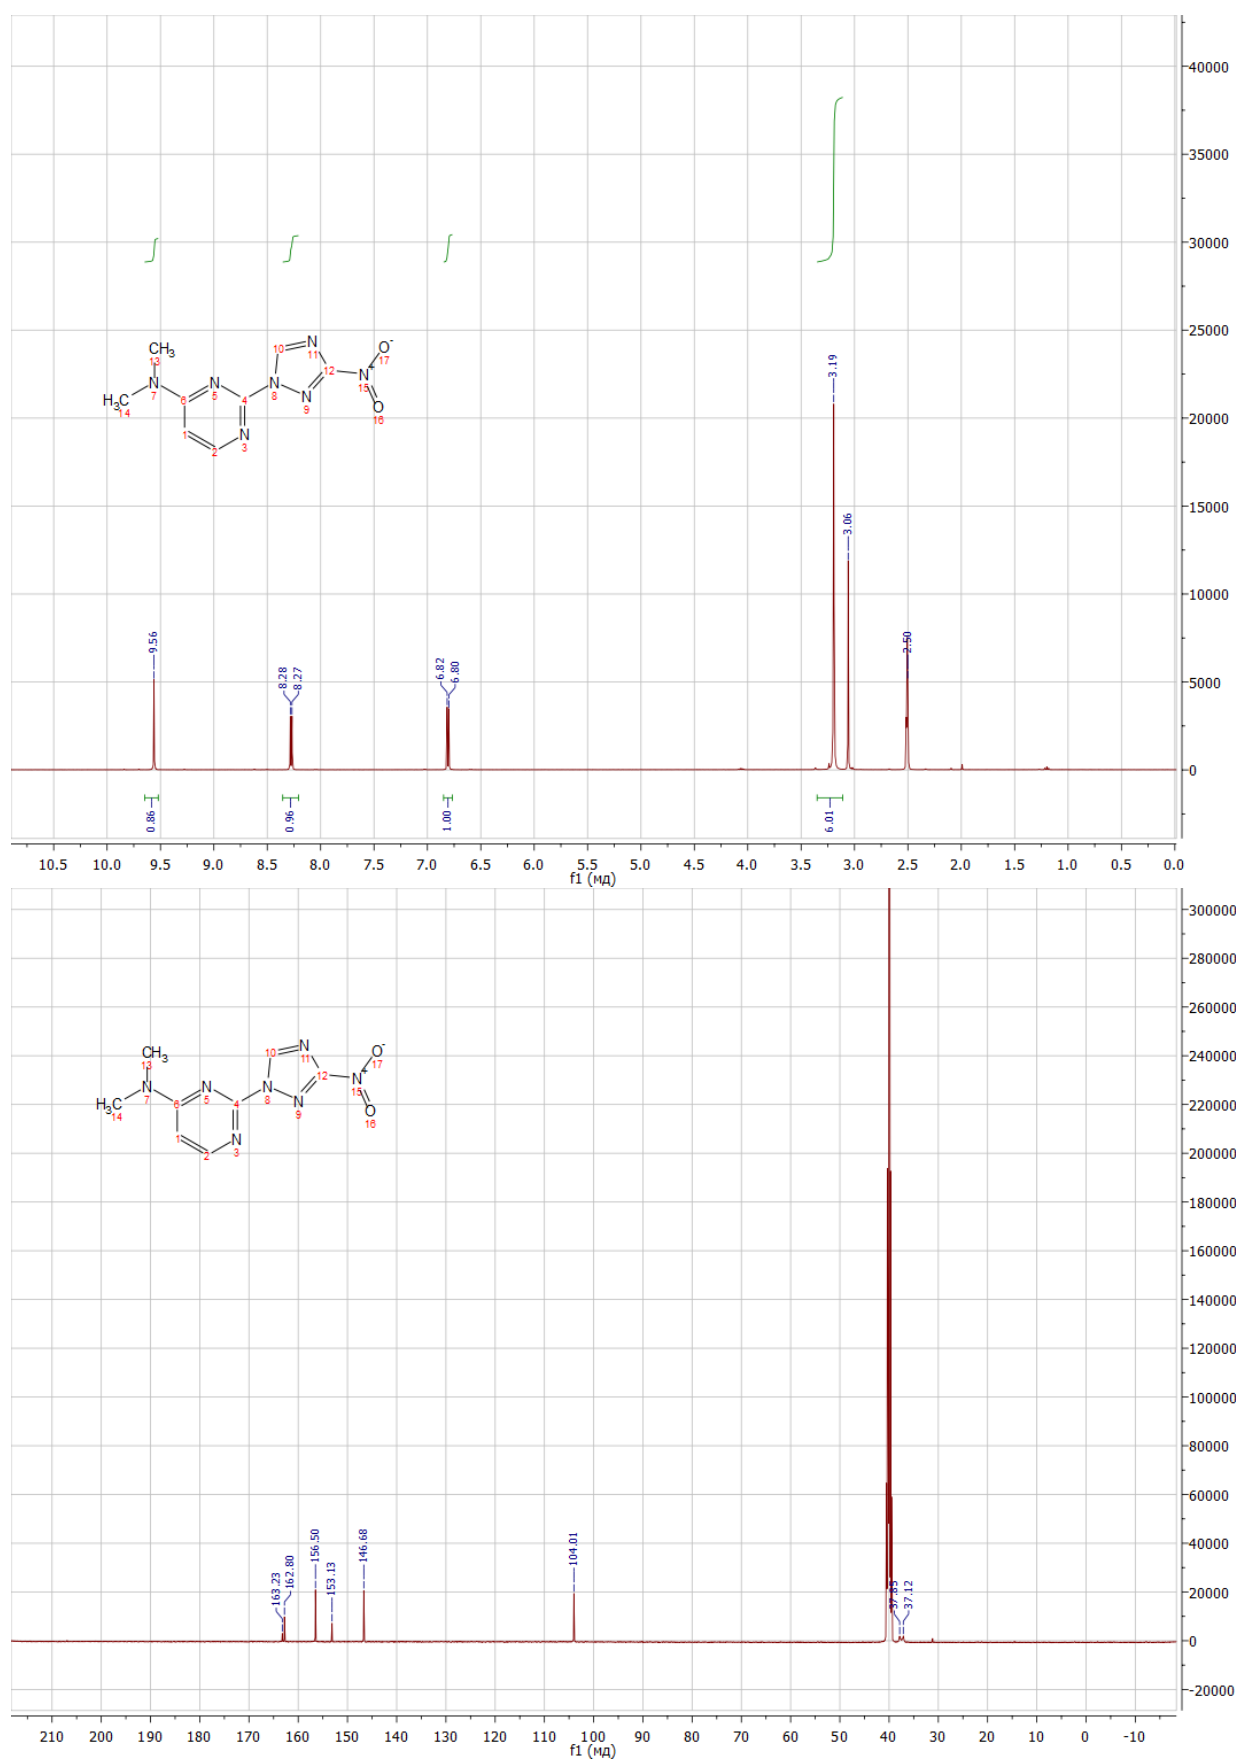

# <sup>1</sup>H and <sup>13</sup>C NMR of *N*-methyl-2-(3-nitro-1*H*-1,2,4-triazol-1-yl)pyrimidin-4-amine (1c)

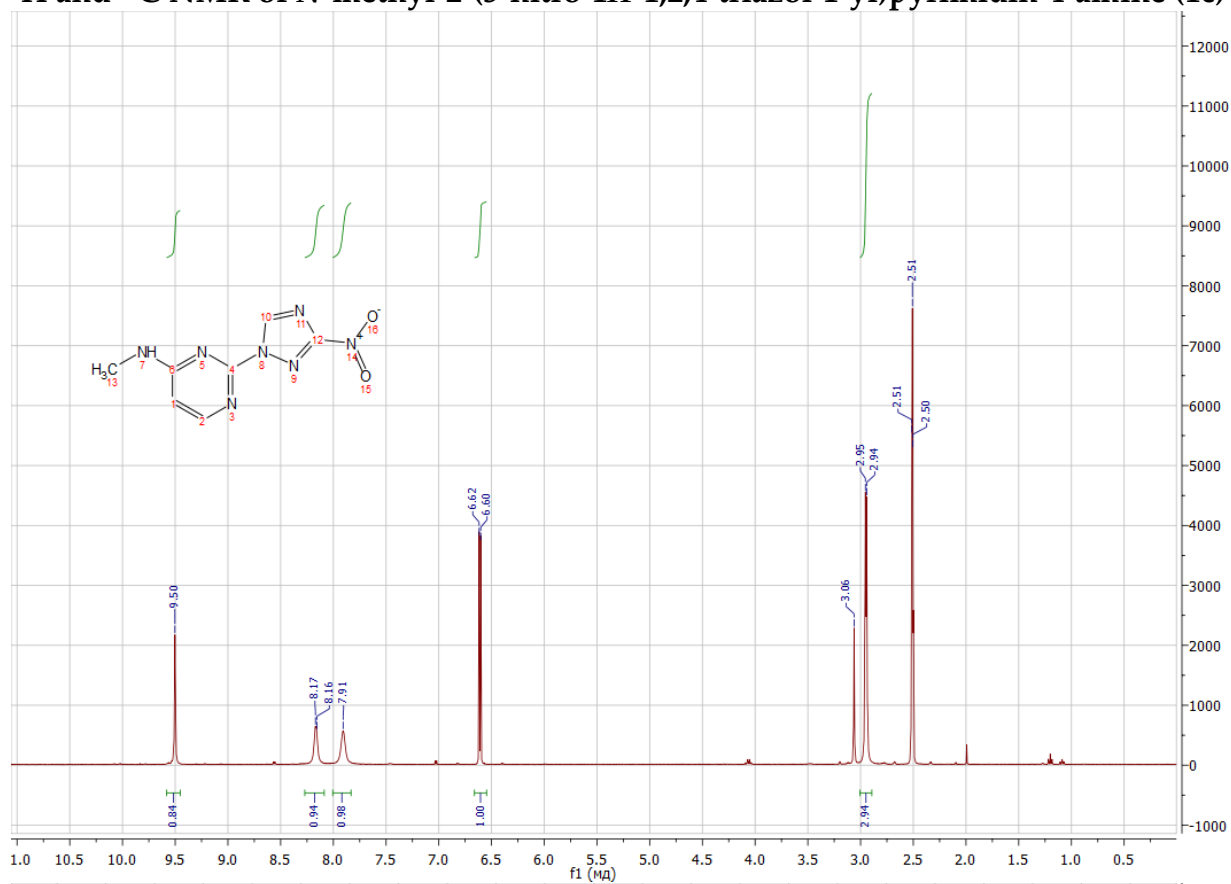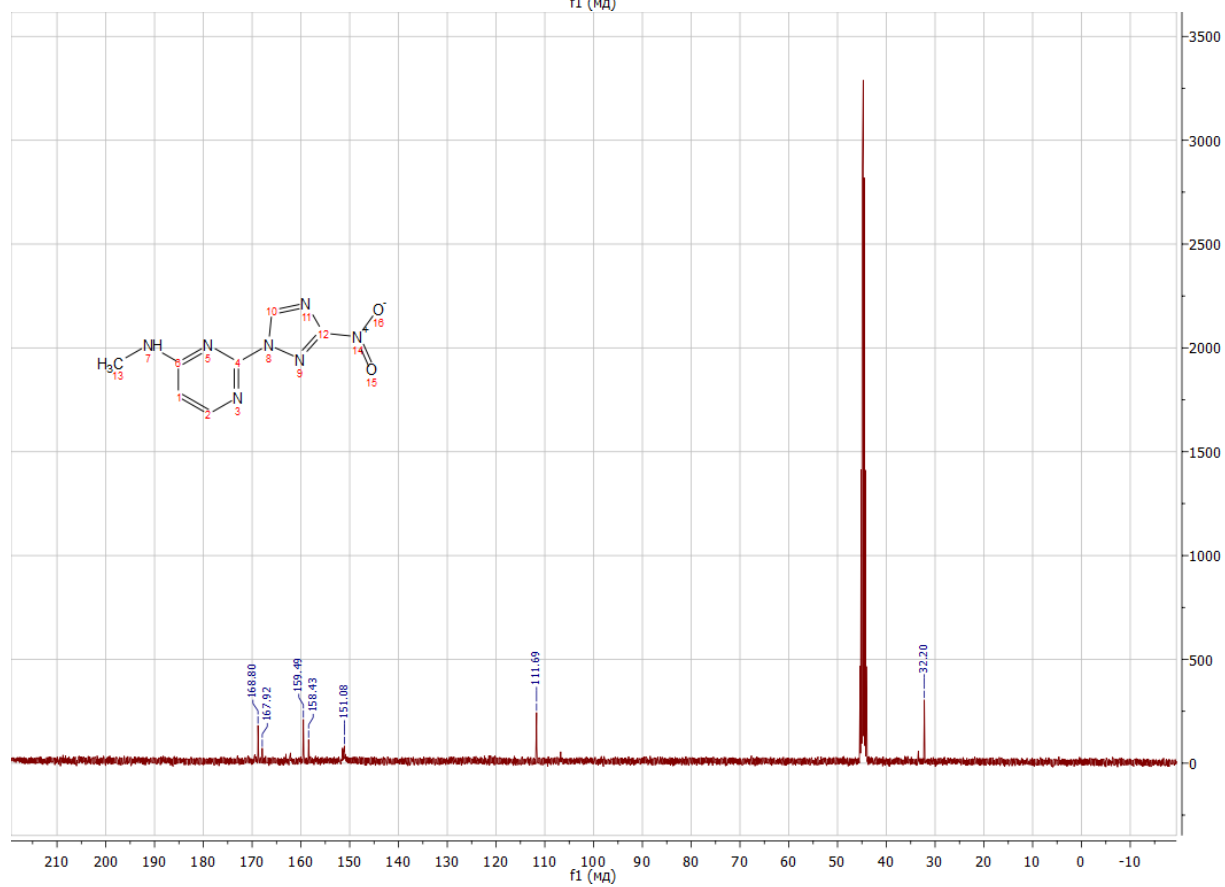

# $^1\text{H}$ and $^{13}\text{C}$ NMR of *N*-benzyl-*N*-methyl-2-(3-nitro-1*H*-1,2,4-triazol-1-yl)pyrimidin-4-amine (1d)

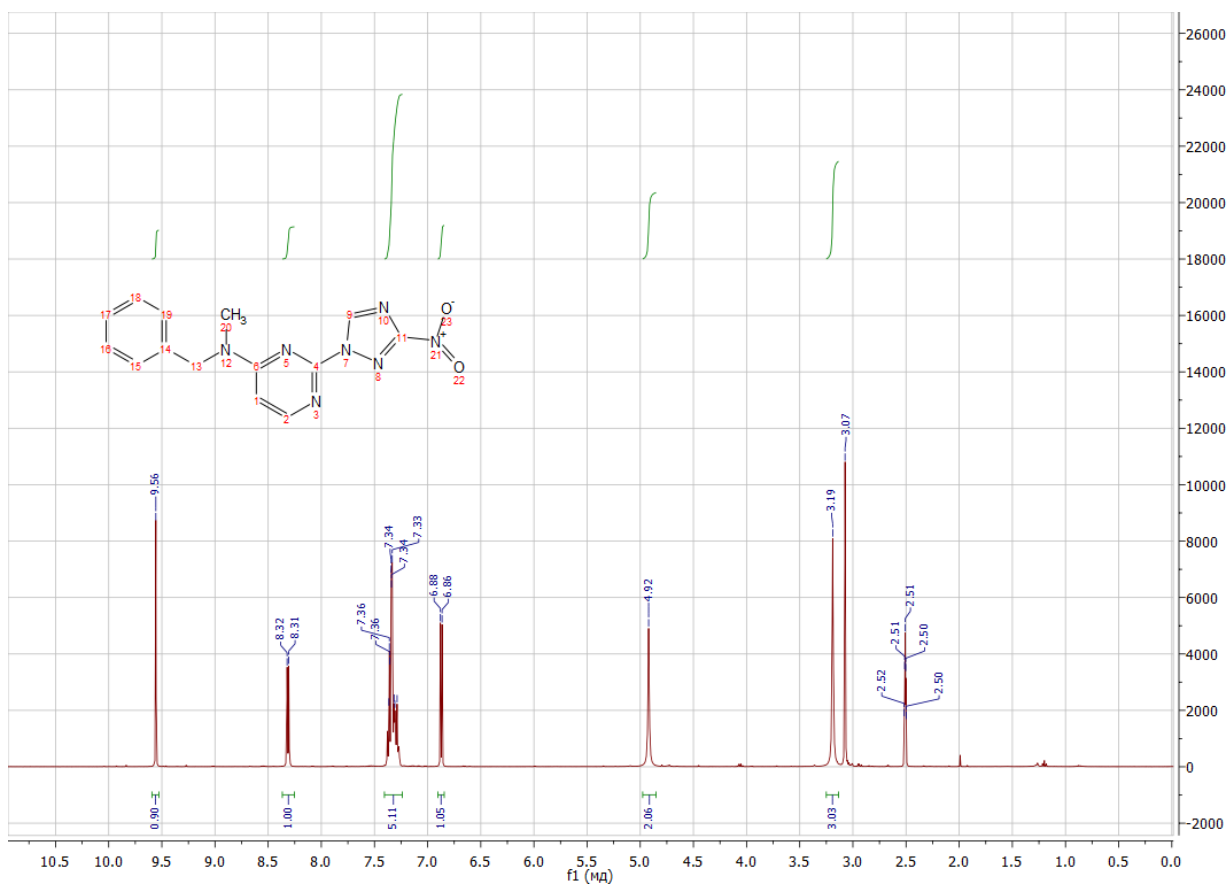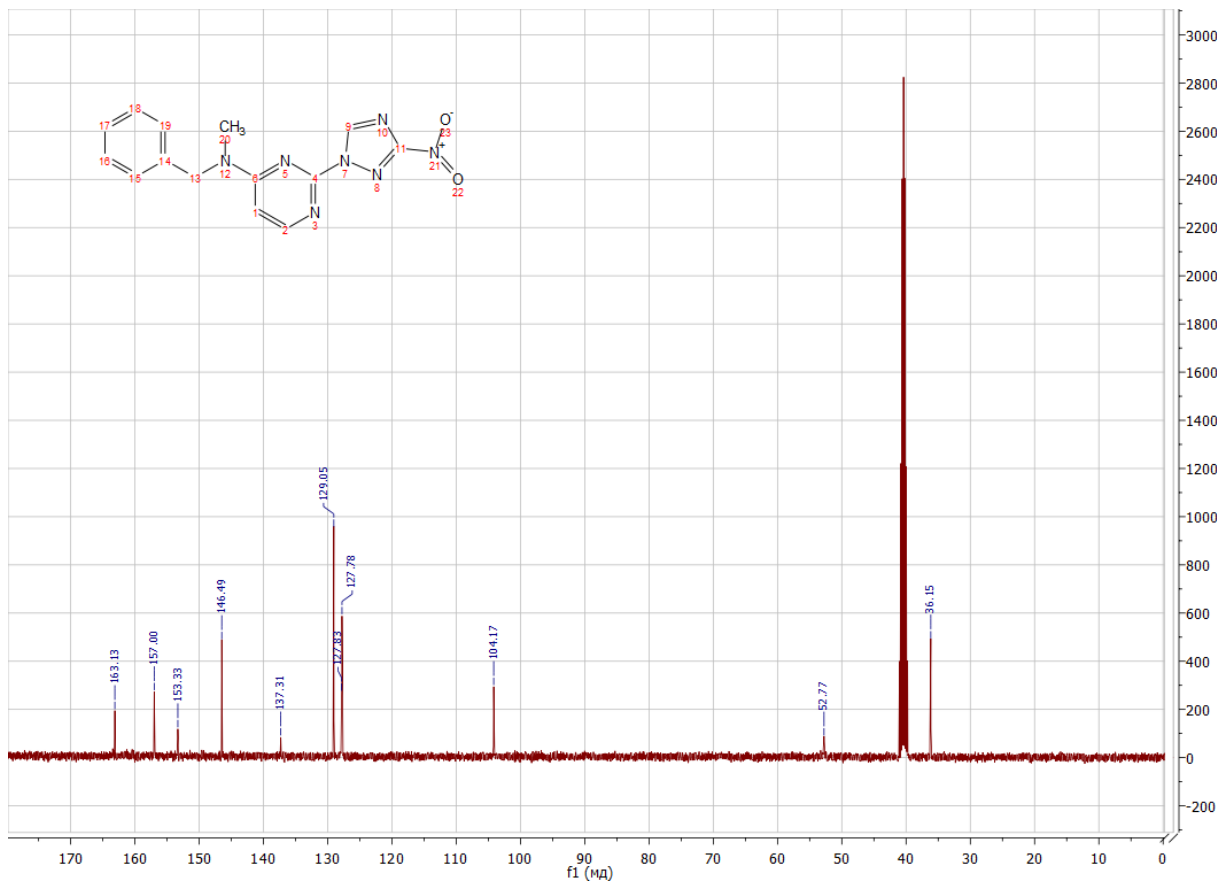

# <sup>1</sup>H and <sup>13</sup>C NMR of *N*-(4-methoxyphenyl)-2-(3-nitro-1*H*-1,2,4-triazol-1-yl)pyrimidin-4-amine (1e)

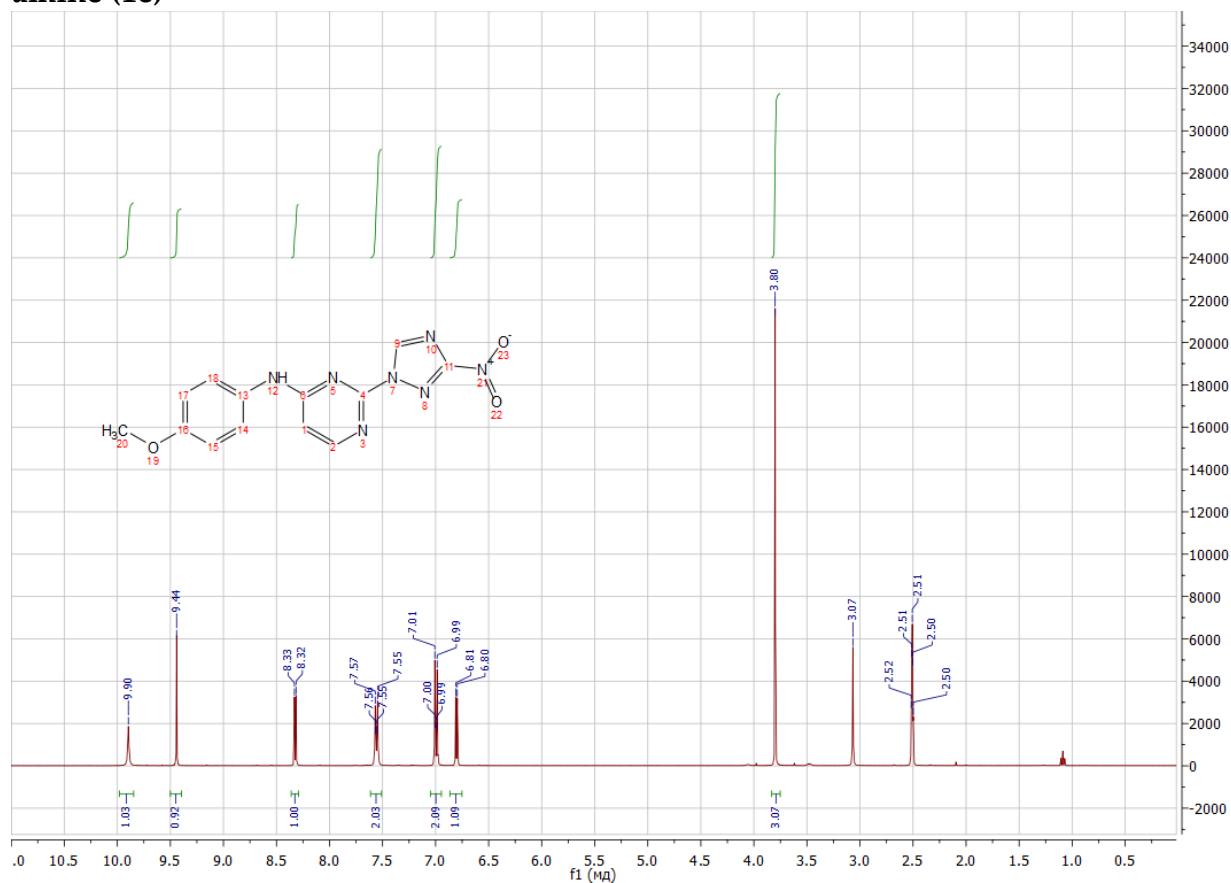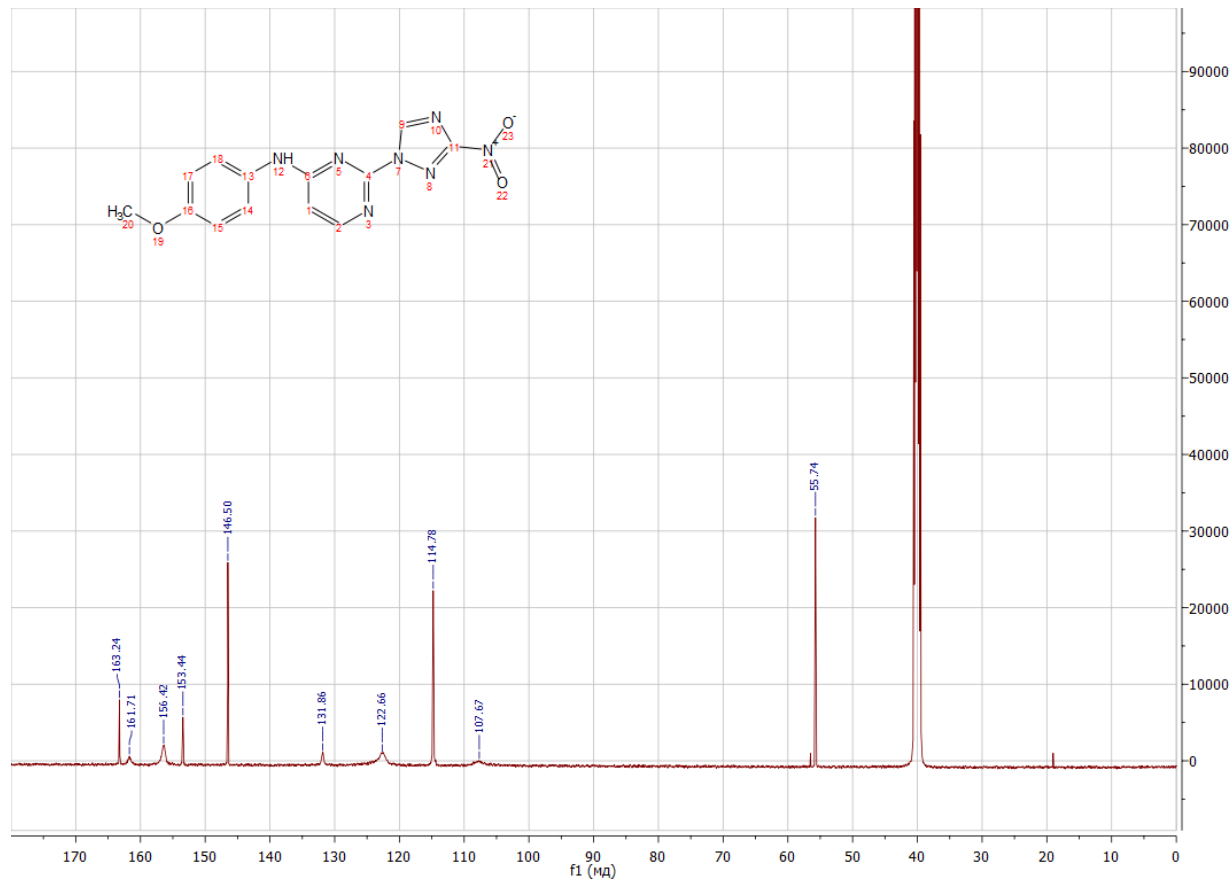

# <sup>1</sup>H and <sup>13</sup>C NMR of 3-((2-(3-nitro-1H-1,2,4-triazol-1-yl)pyrimidin-4-yl)amino)propan-1-ol (1f)

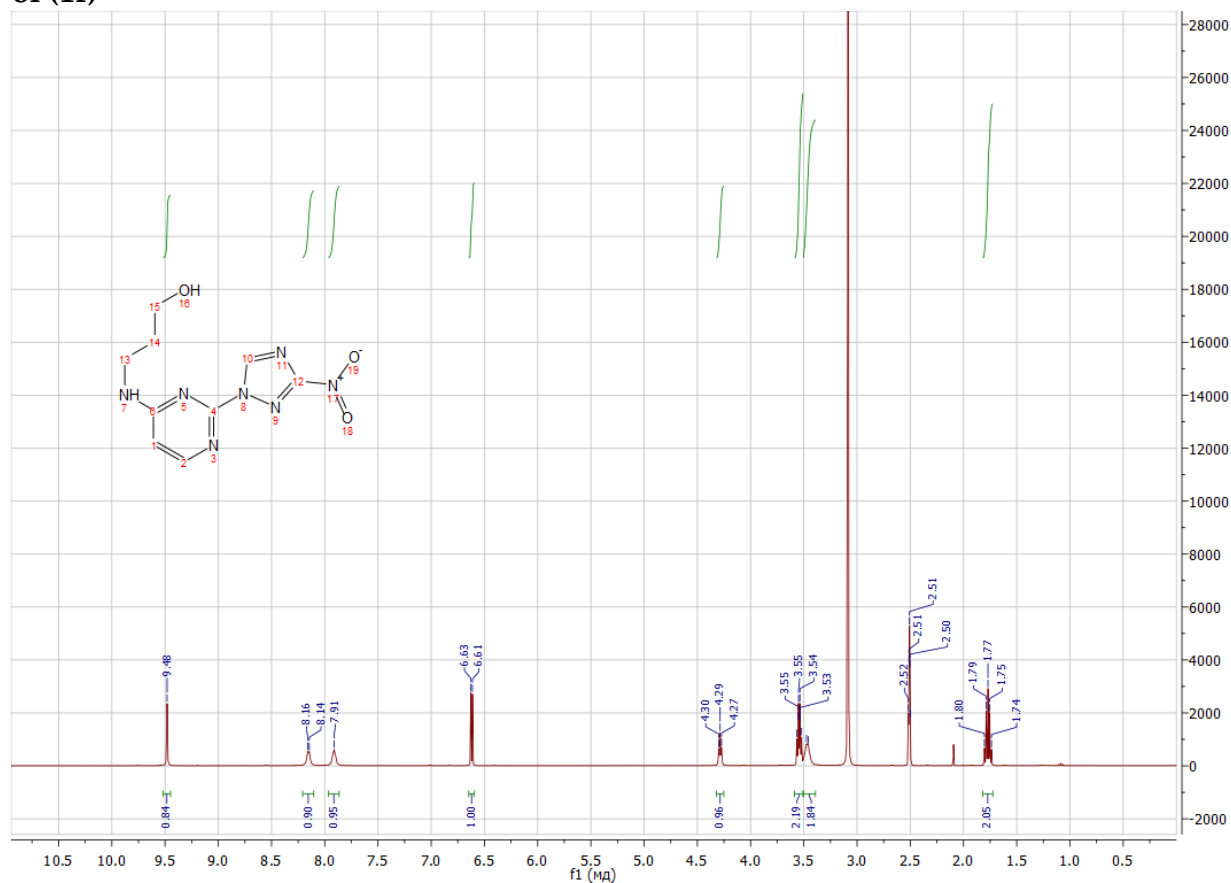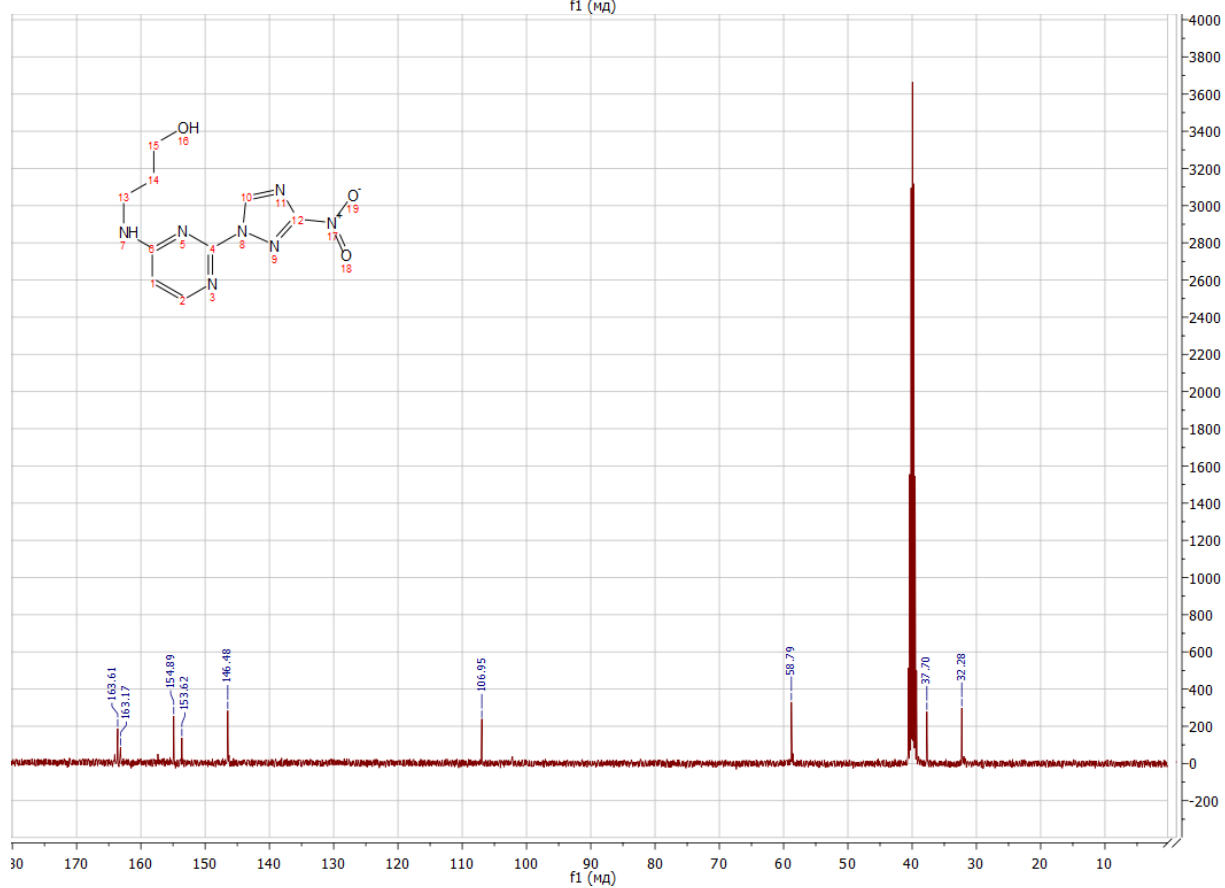

# <sup>1</sup>H and <sup>13</sup>C NMR of *N*-ethyl-2-(3-nitro-1*H*-1,2,4-triazol-1-yl)pyrimidin-4-amine (1g)

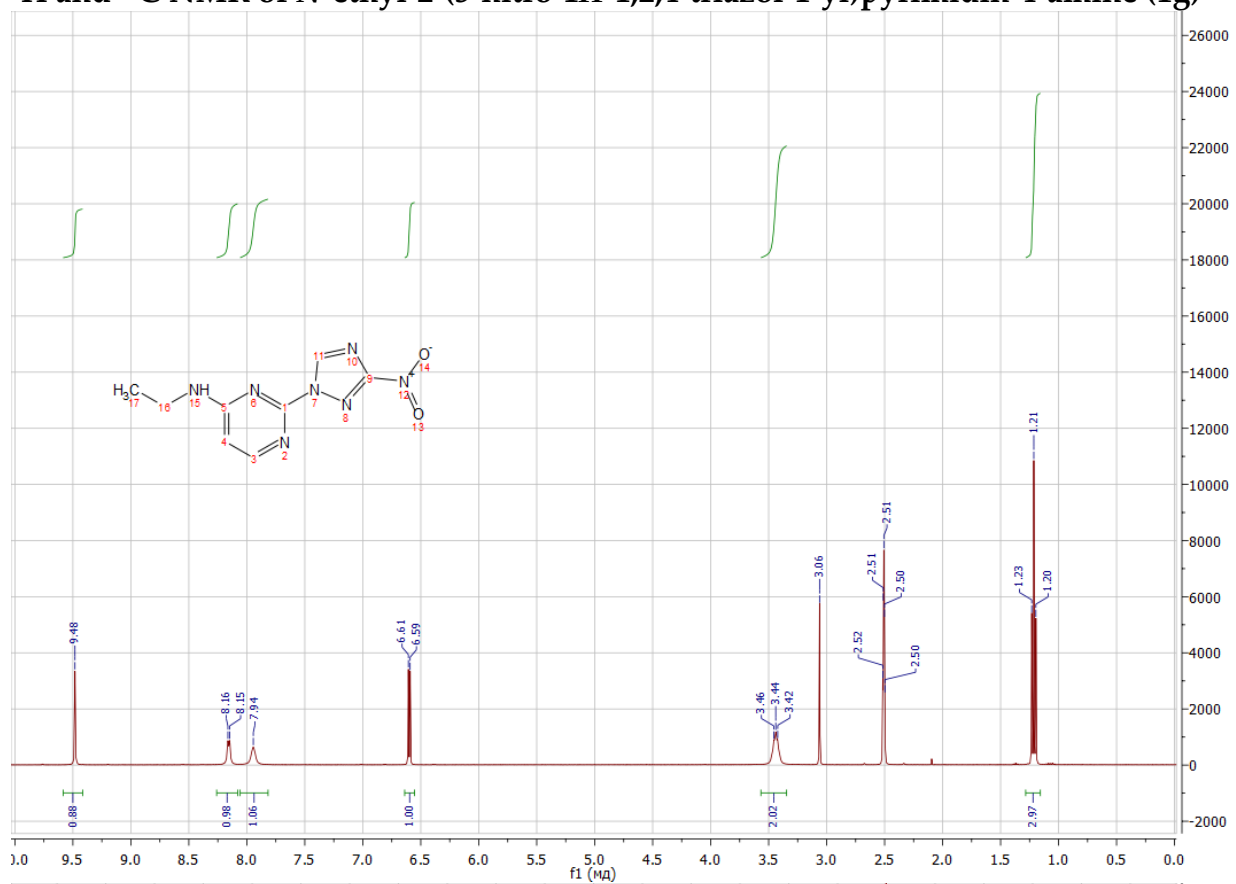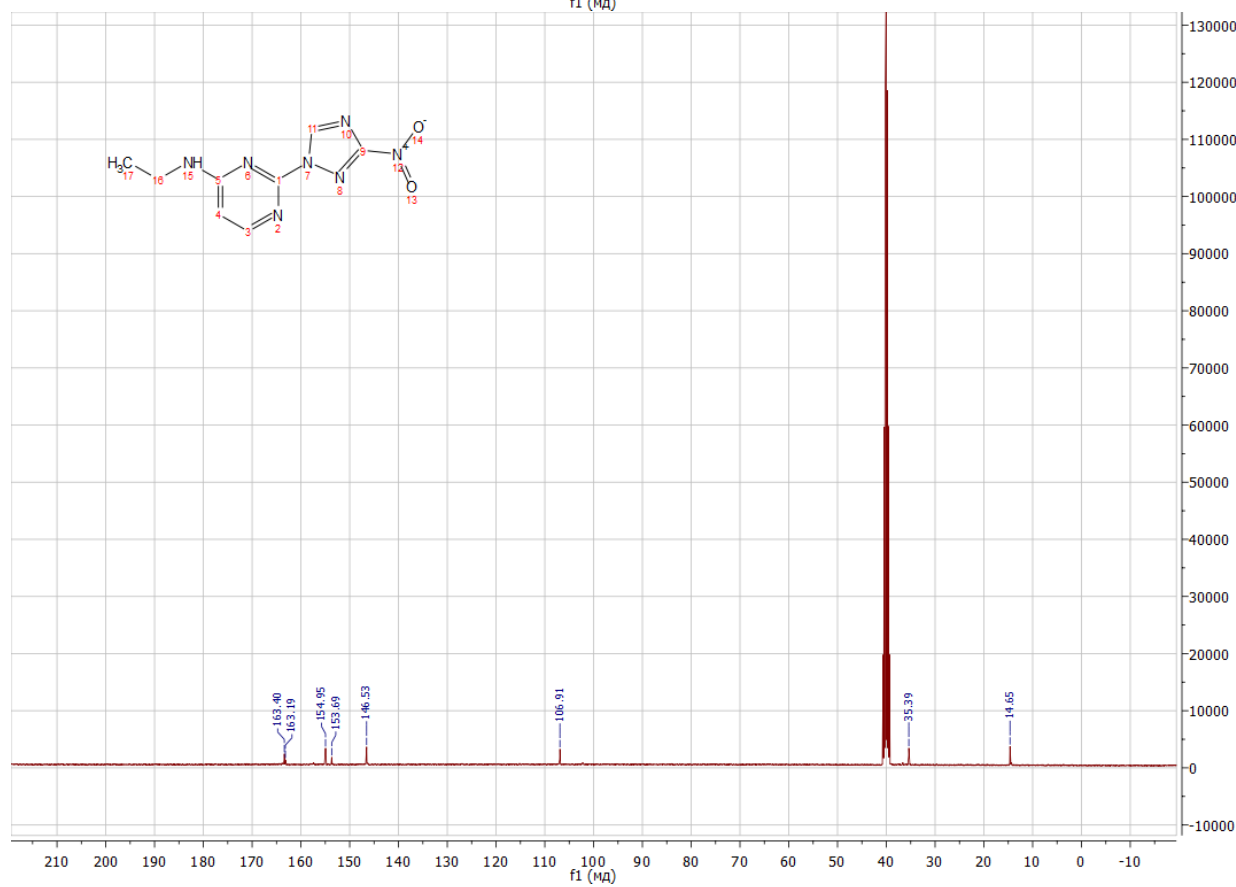

# $^1\text{H}$ and $^{13}\text{C}$ NMR of 4-(2-(3-Nitro-1H-1,2,4-triazol-1-yl)pyrimidin-4-yl)morpholine (1h)

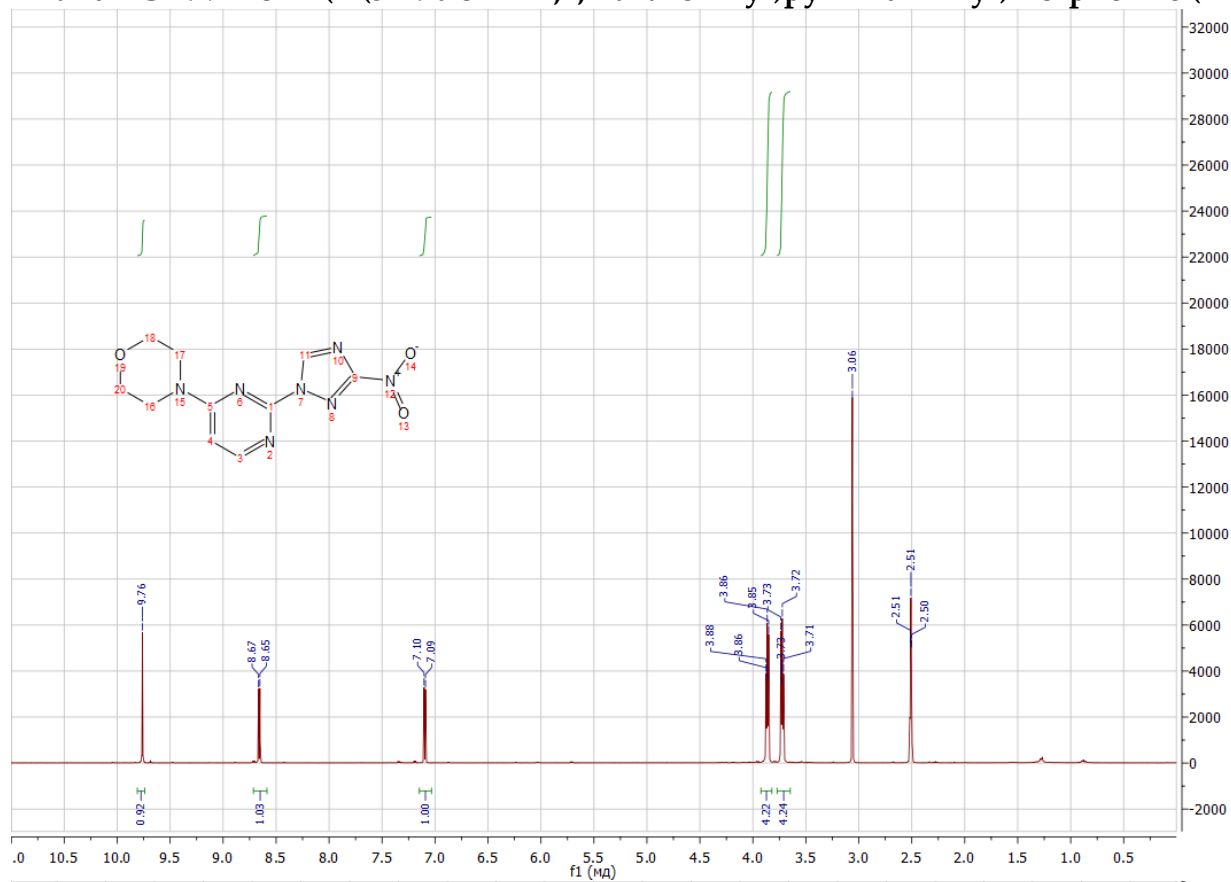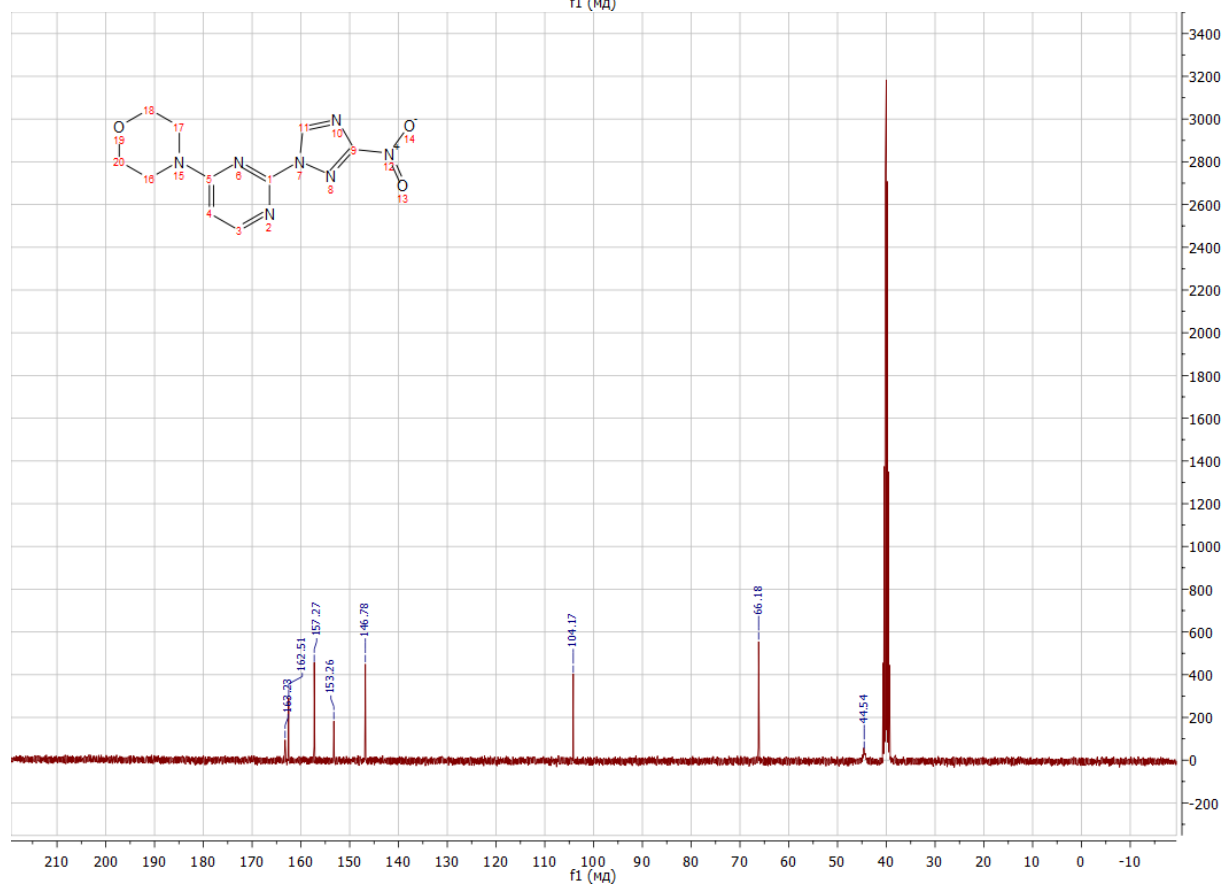

**<sup>1</sup>H and <sup>13</sup>C NMR of 4-(4-methylpiperazin-1-yl)-2-(3-nitro-1H-1,2,4-triazol-1-yl)pyrimidine (1i)**

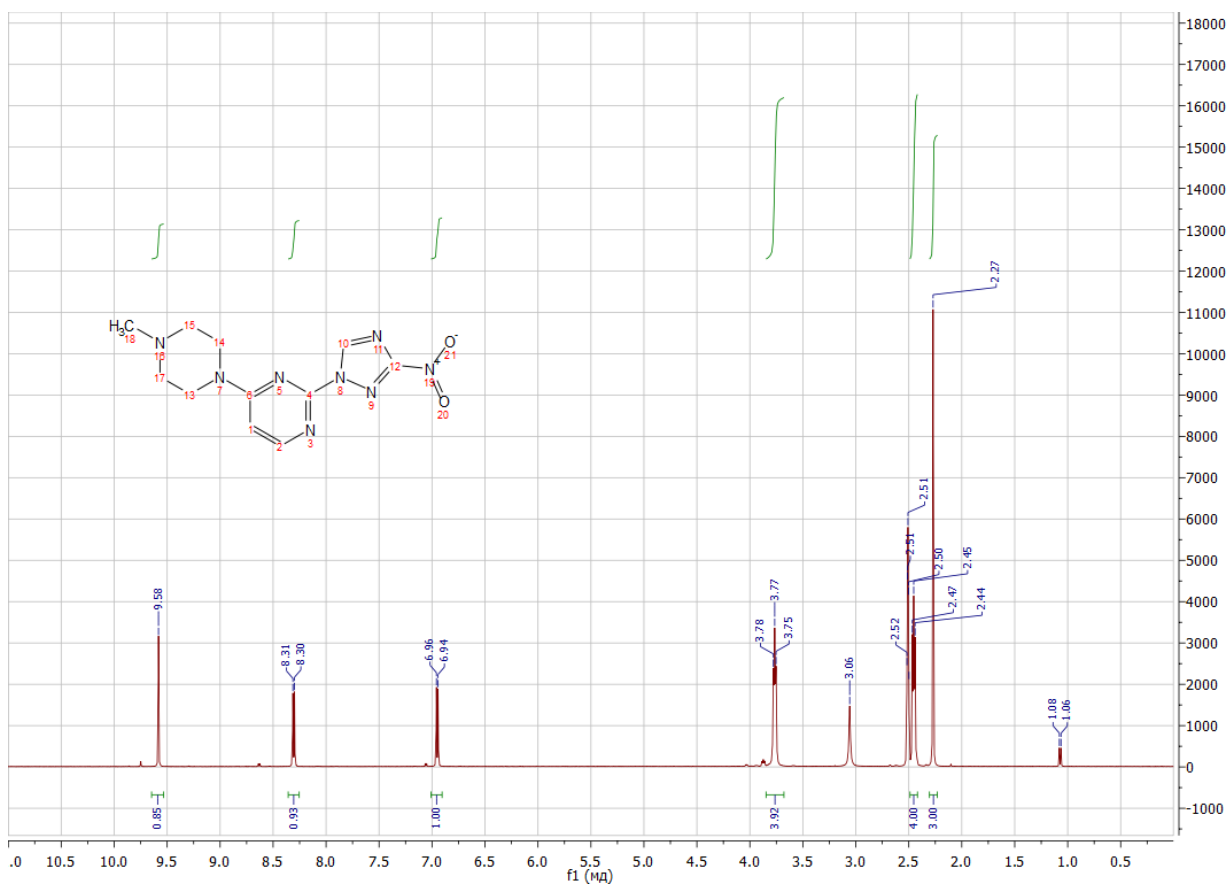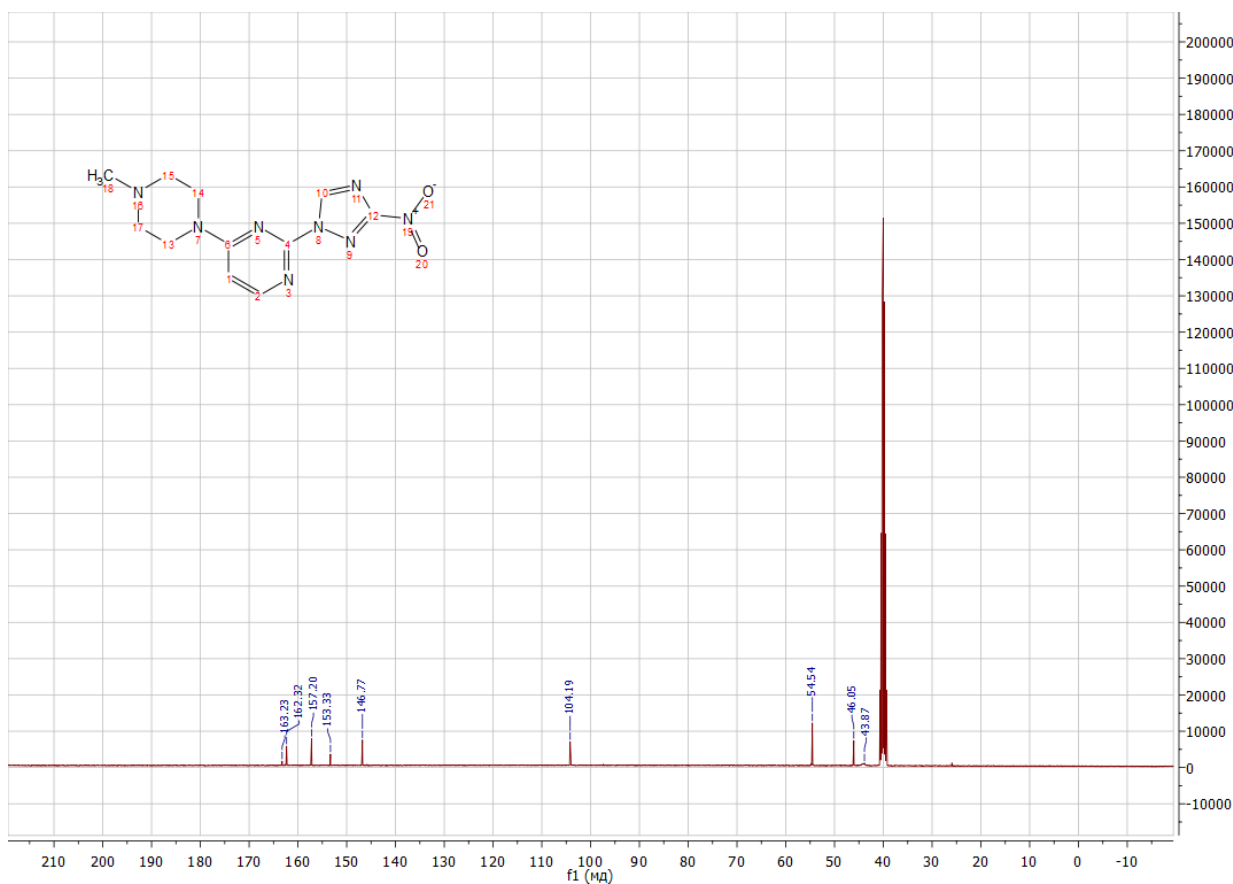



# <sup>1</sup>H and <sup>13</sup>C NMR of *N*-benzyl-2-(3-nitro-1*H*-1,2,4-triazol-1-yl)pyrimidin-4-amine (1j)

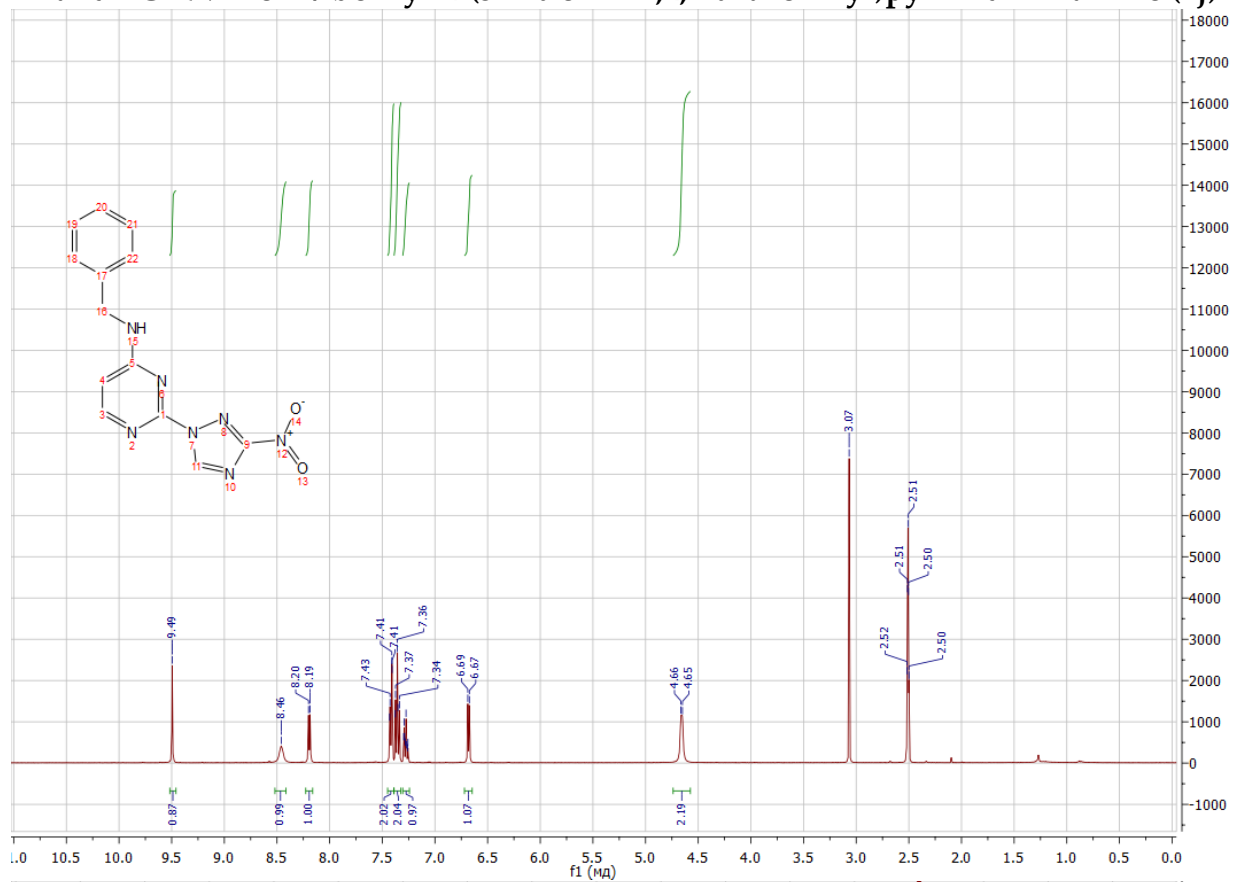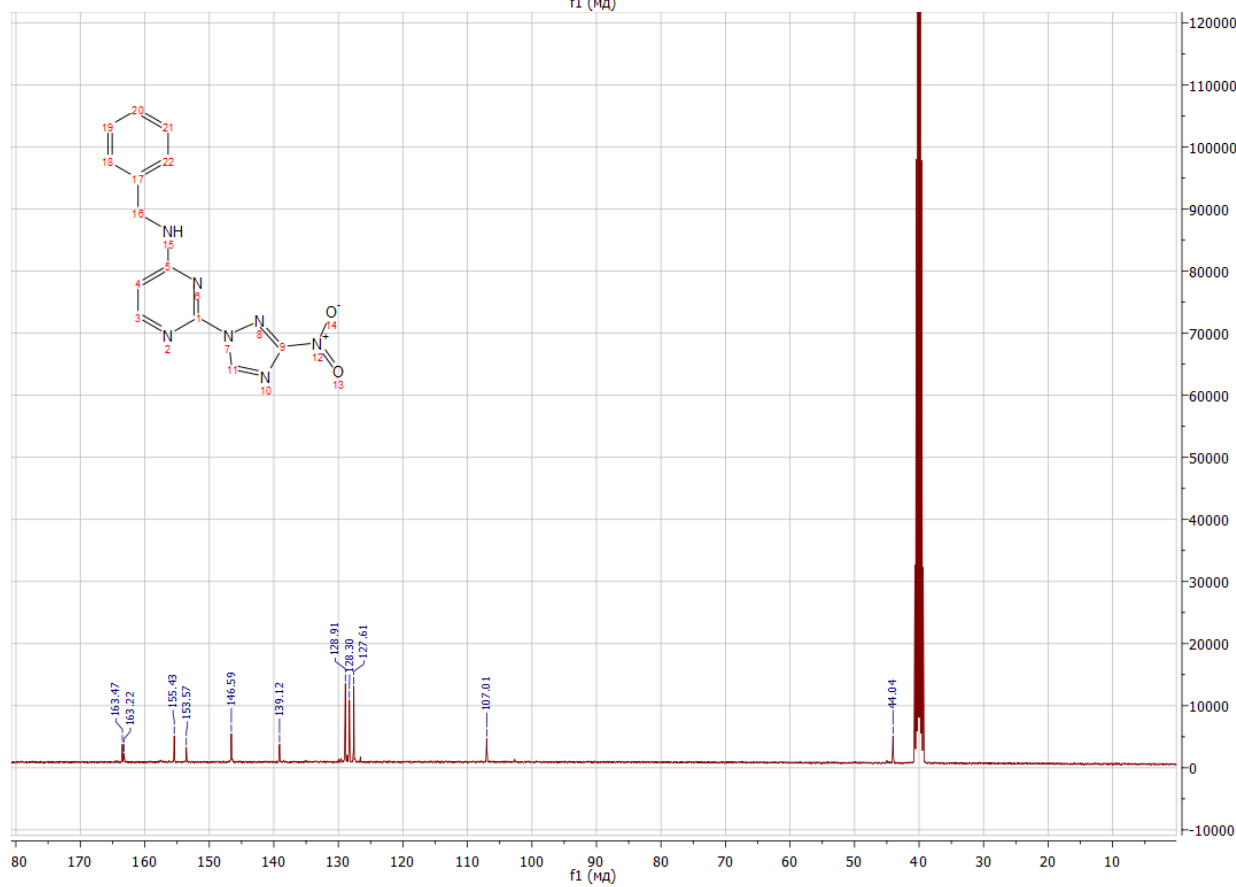

# <sup>1</sup>H and <sup>13</sup>C NMR of *N*-isobutyl-2-(3-nitro-1*H*-1,2,4-triazol-1-yl)pyrimidin-4-amine (1k)

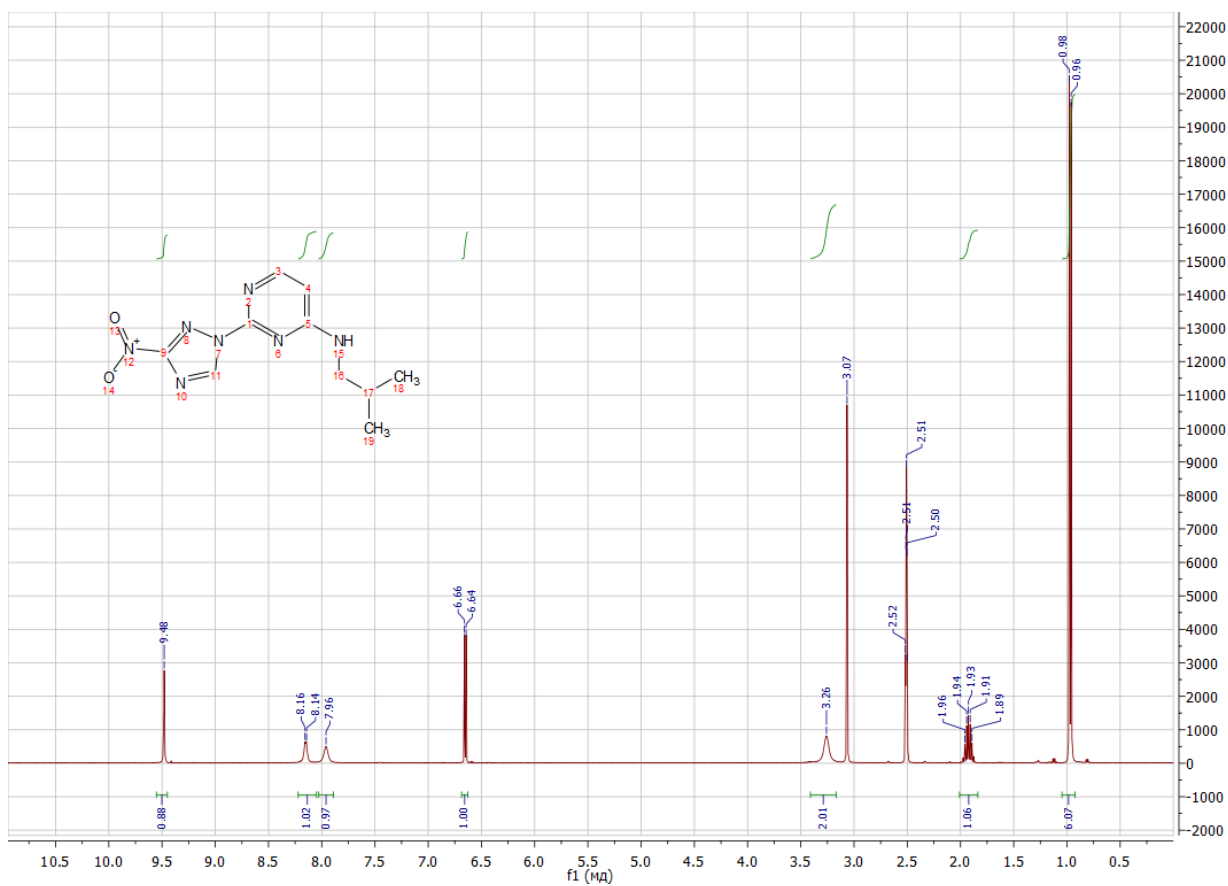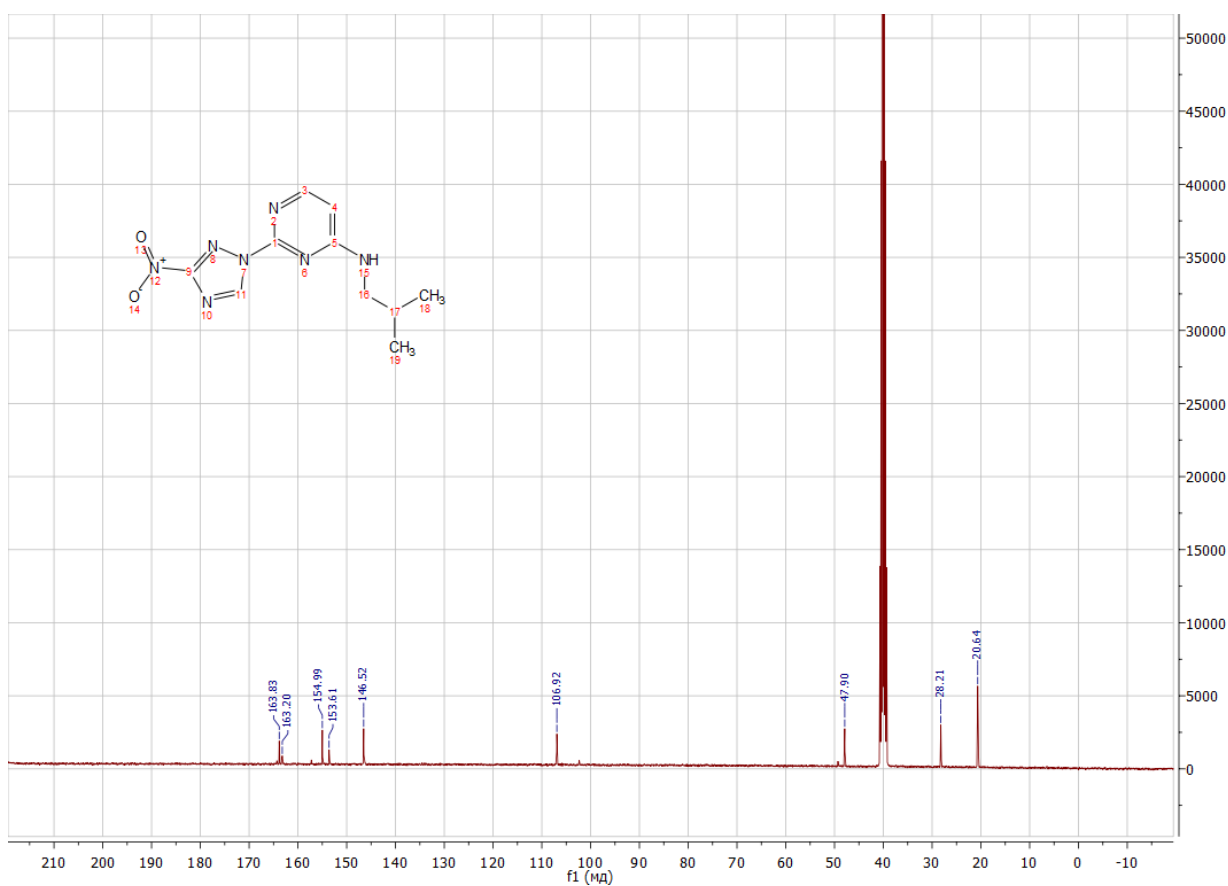

<sup>1</sup>H and <sup>13</sup>C NMR of 2,2'-((2-(3-nitro-1H-1,2,4-triazol-1-yl)pyrimidin-4-yl)azanediyl)bis(ethan-1-ol) (11)

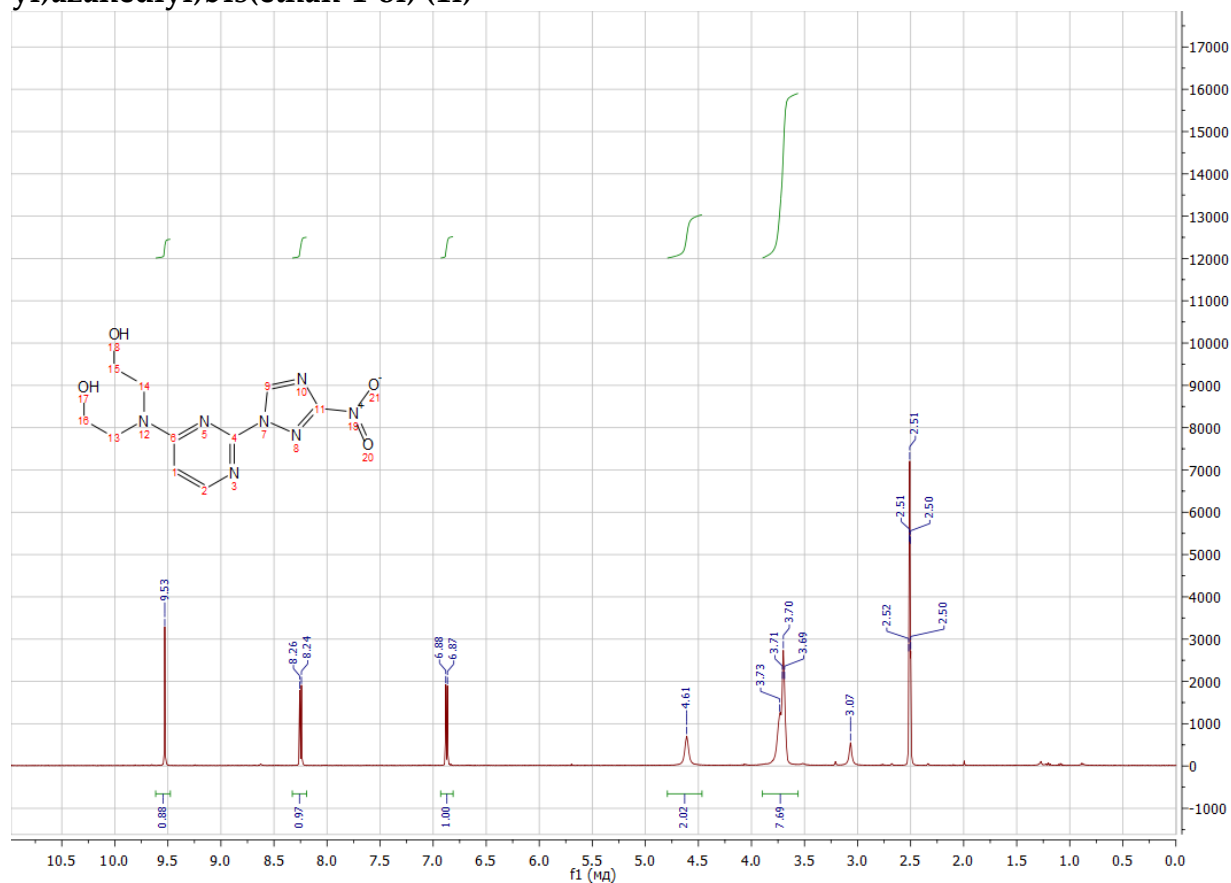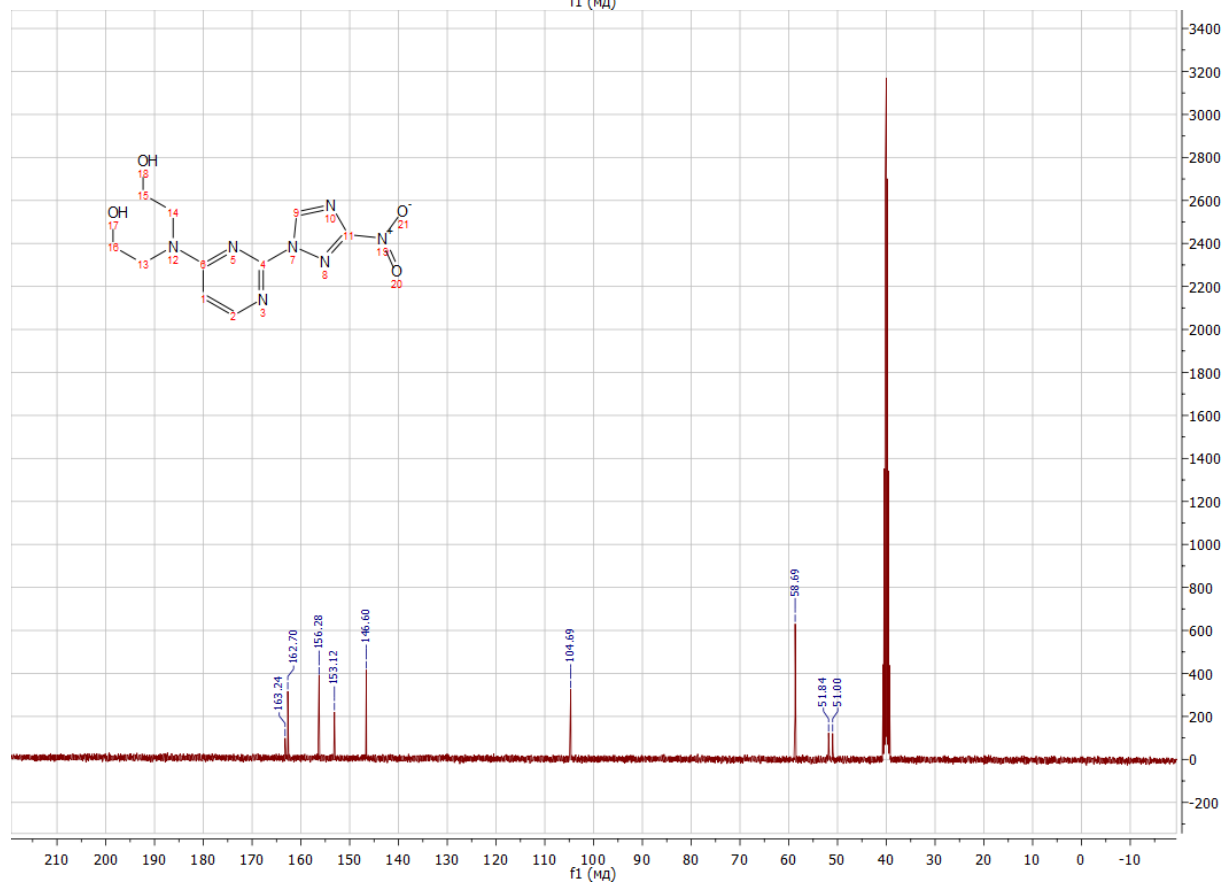

# <sup>1</sup>H and <sup>13</sup>C NMR of 2-(3-nitro-1H-1,2,4-triazol-1-yl)-N-(p-tolyl)pyrimidin-4-amine (1m)

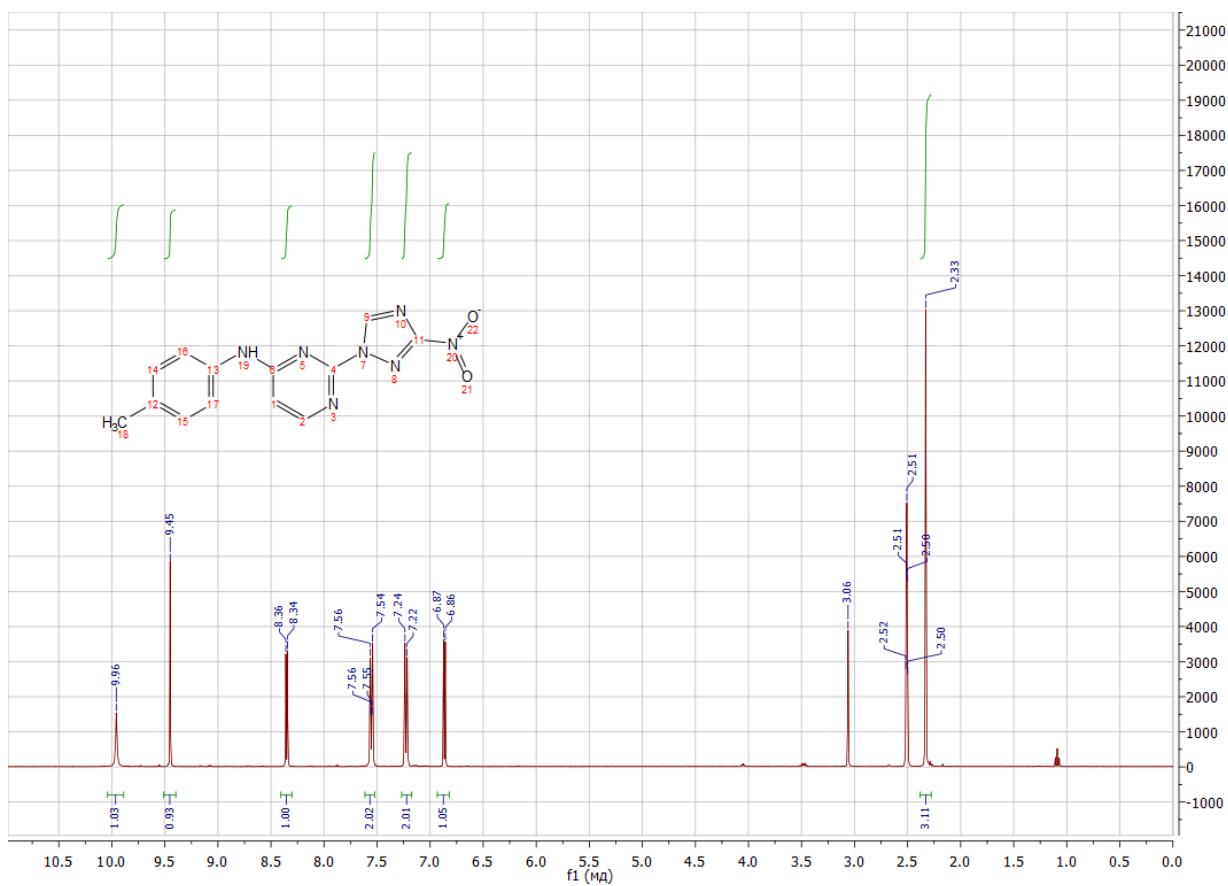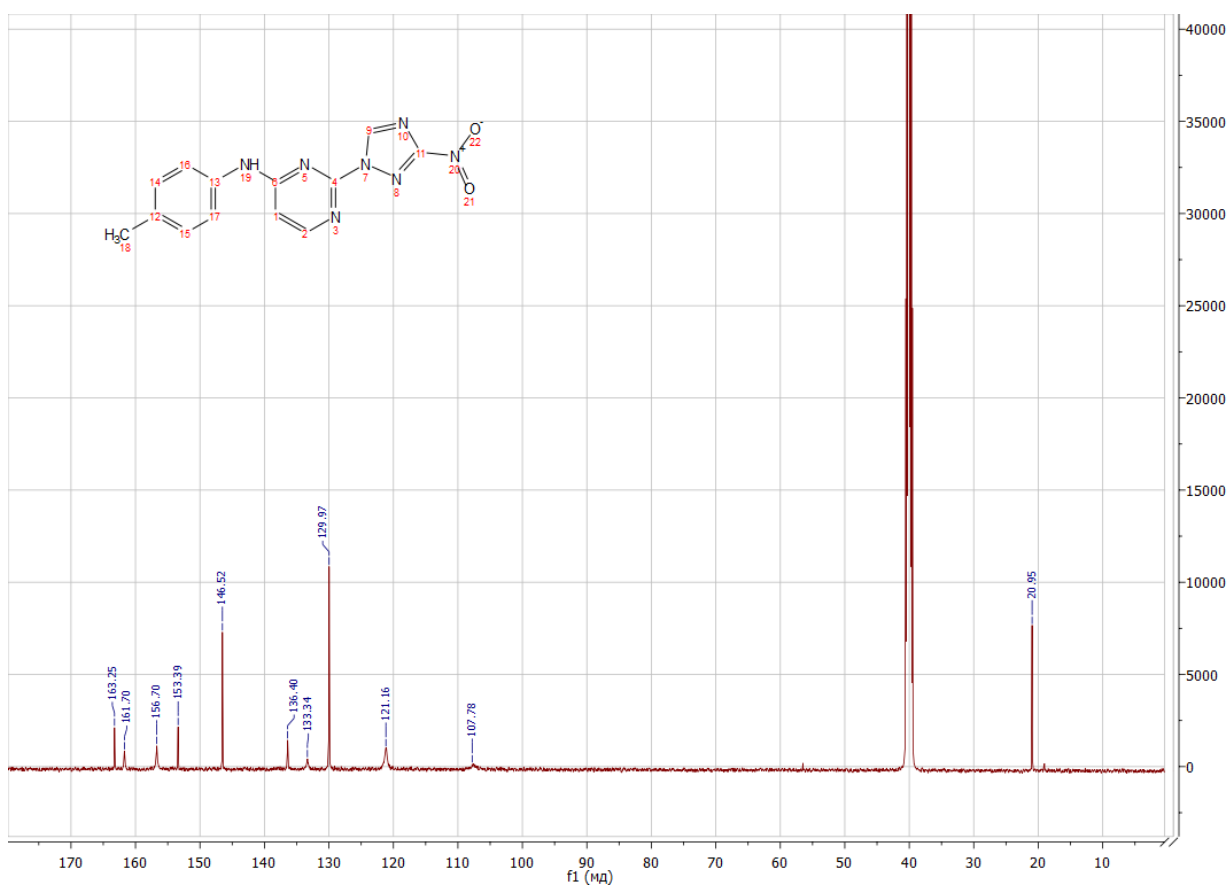

**<sup>1</sup>H and <sup>13</sup>C NMR of N-cyclopropyl-2-(3-nitro-1H-1,2,4-triazol-1-yl)pyrimidin-4-amine (1n)**

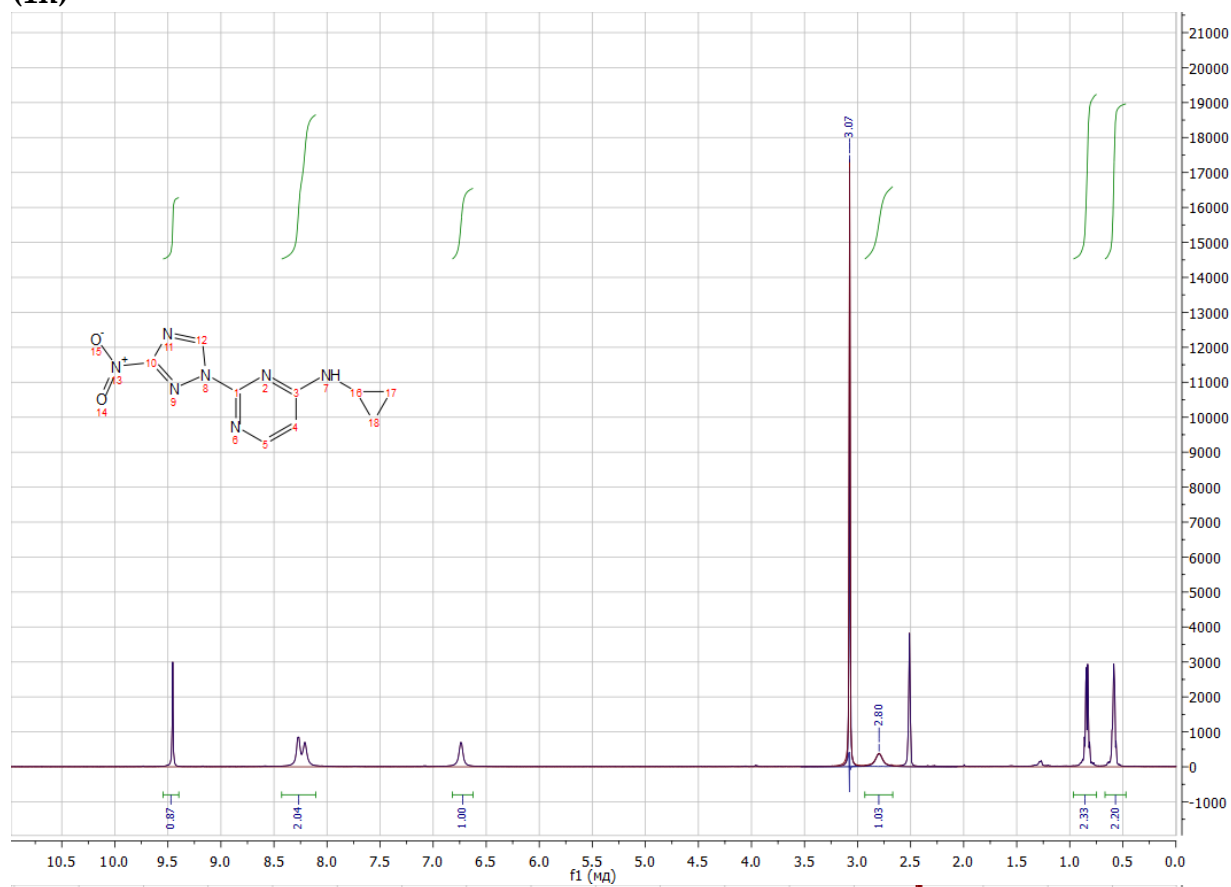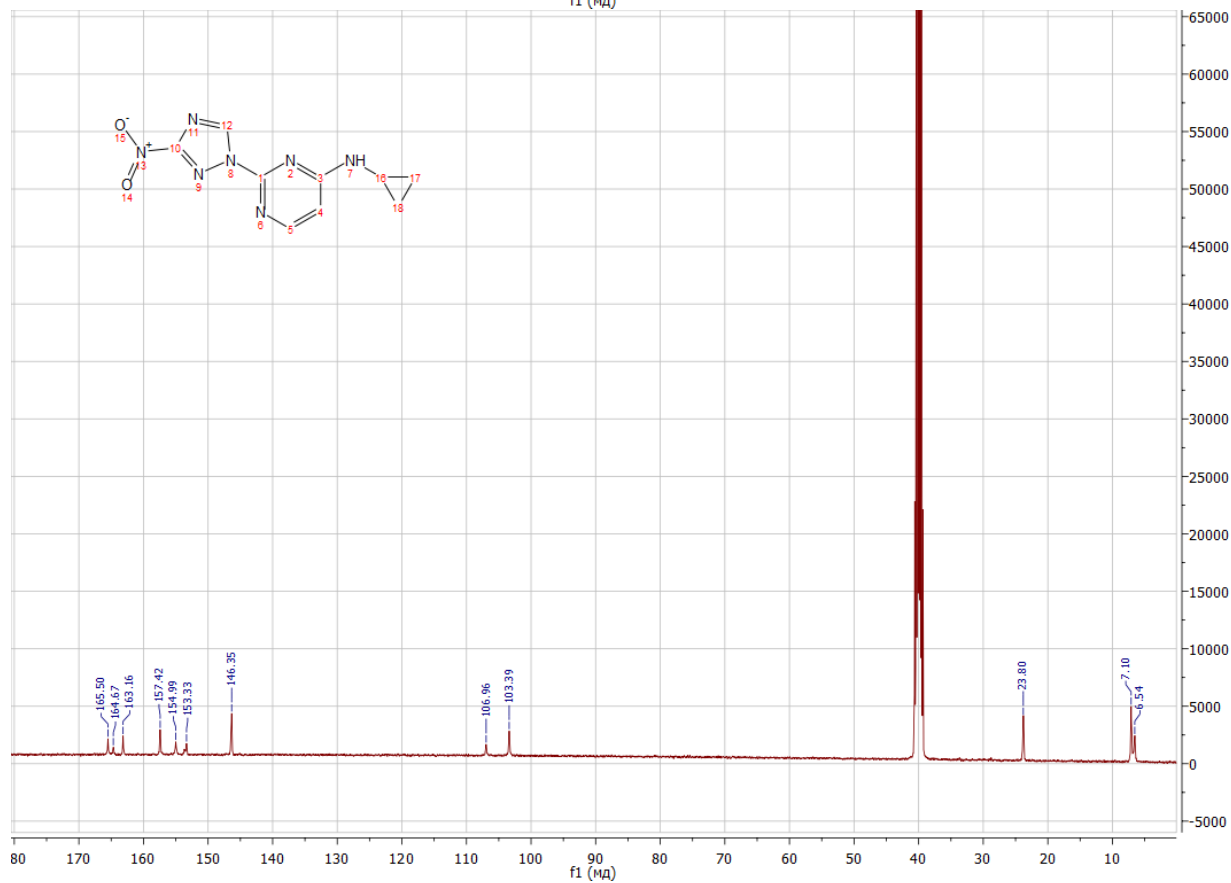

# $^1\text{H}$ and $^{13}\text{C}$ NMR of *N*-isopropyl-2-(3-nitro-1*H*-1,2,4-triazol-1-yl)pyrimidin-4-amine (1o)

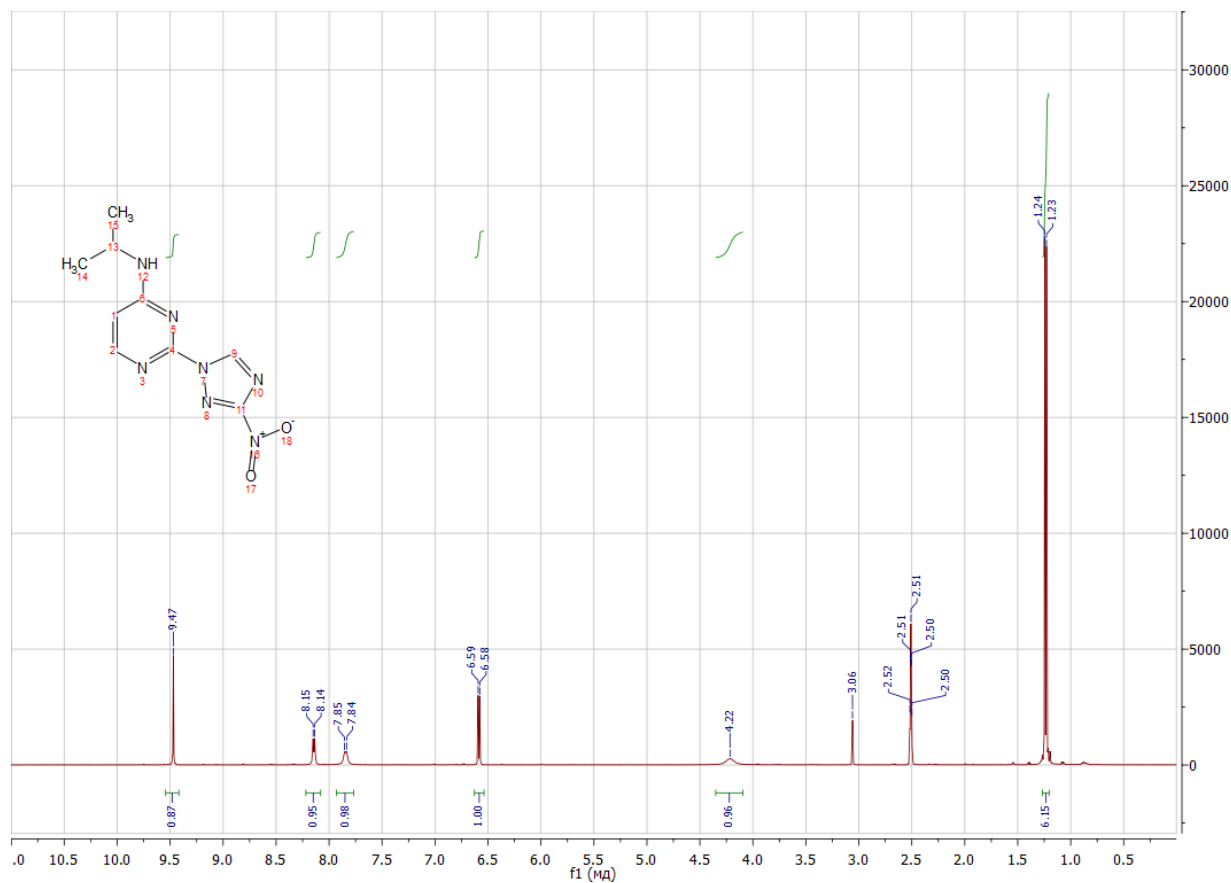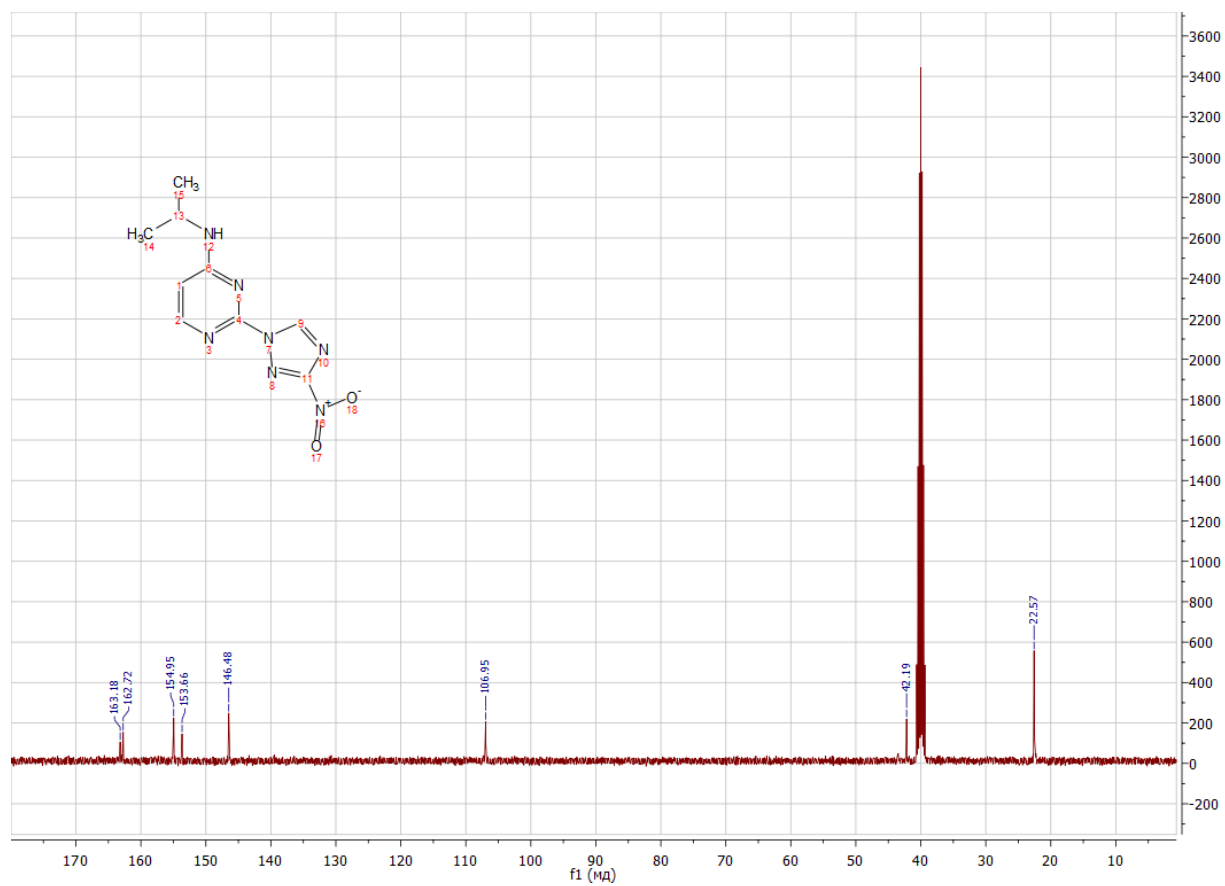

# <sup>1</sup>H and <sup>13</sup>C NMR of *N*-(3-(1*H*-imidazol-1-yl)propyl)-2-(3-nitro-1*H*-1,2,4-triazol-1-yl)pyrimidin-4-amine (1p)

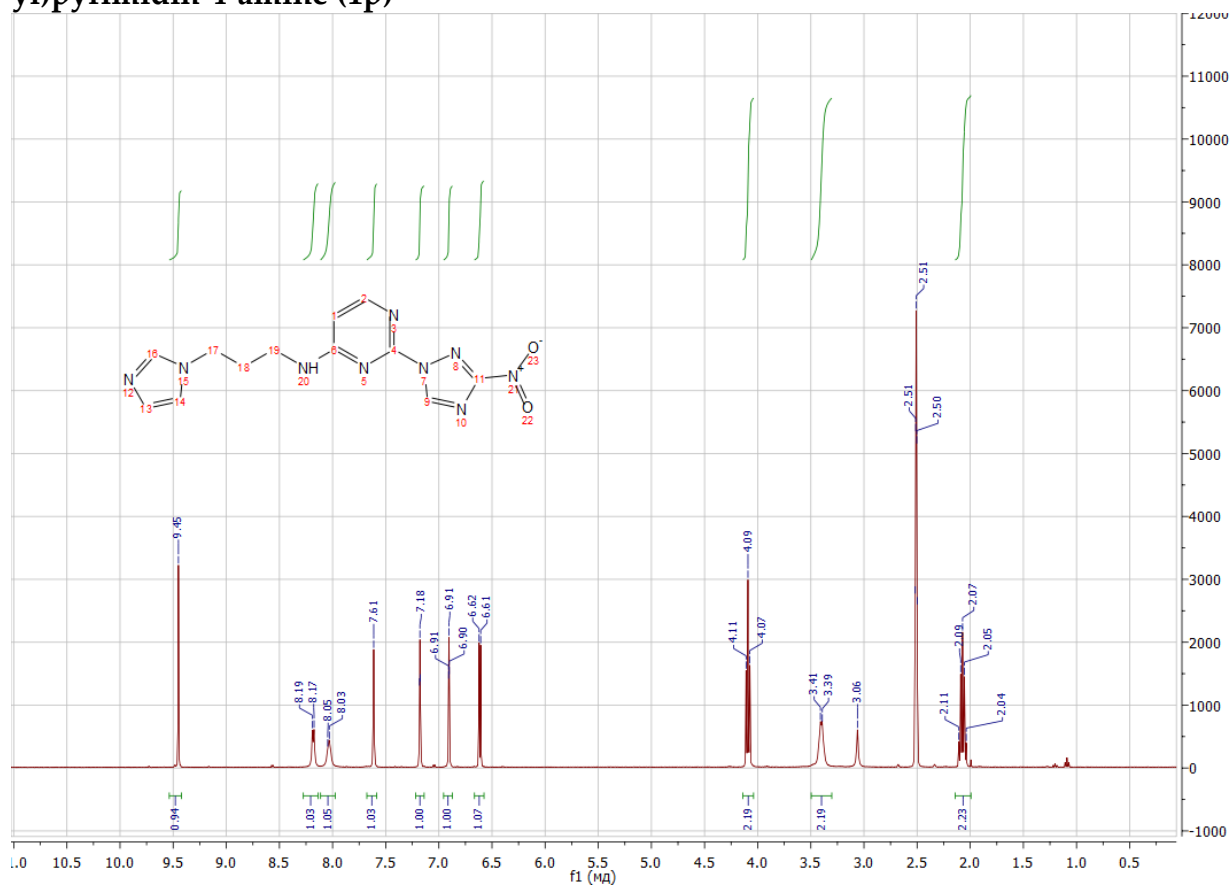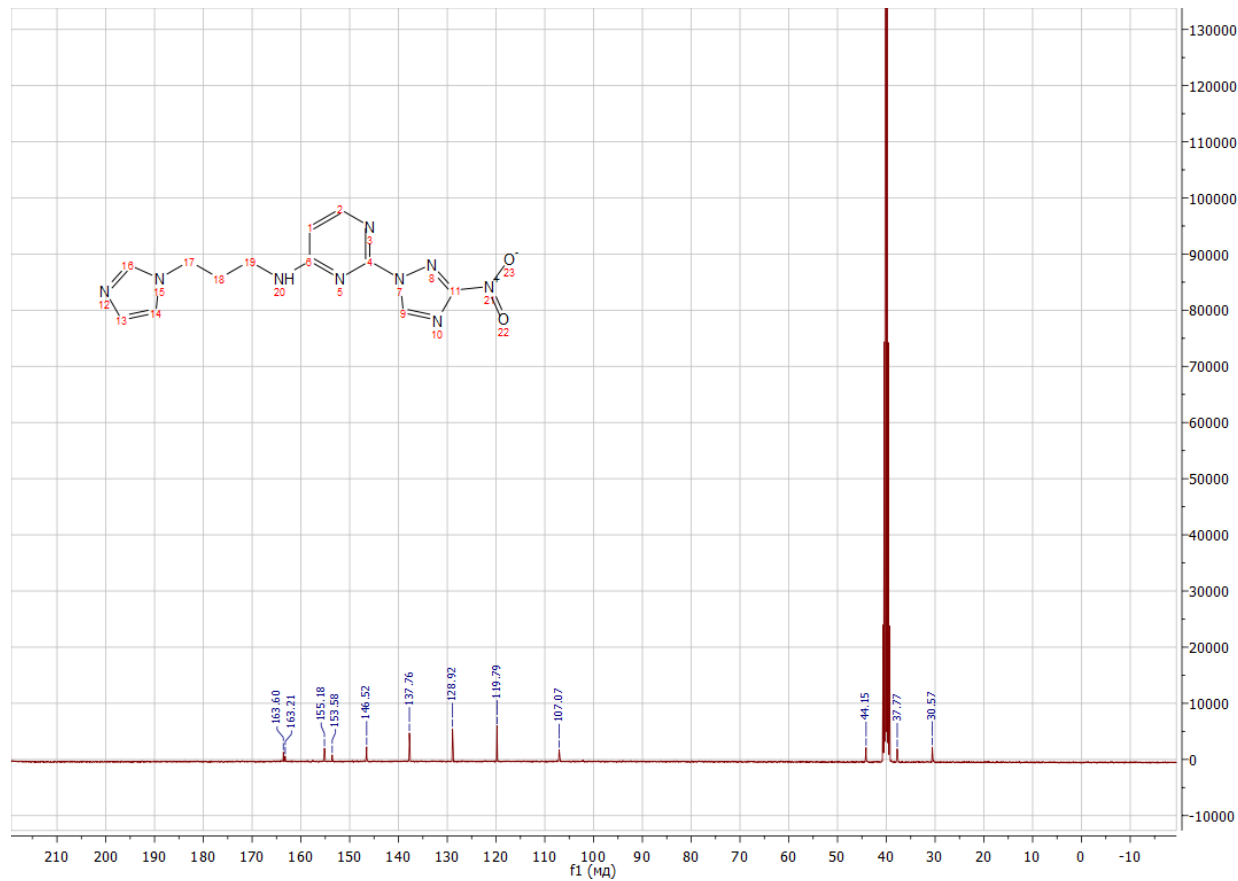

# <sup>1</sup>H and <sup>13</sup>C NMR of 2-(3-nitro-1*H*-1,2,4-triazol-1-yl)-4-(pyrrolidin-1-yl)pyrimidine (1q)

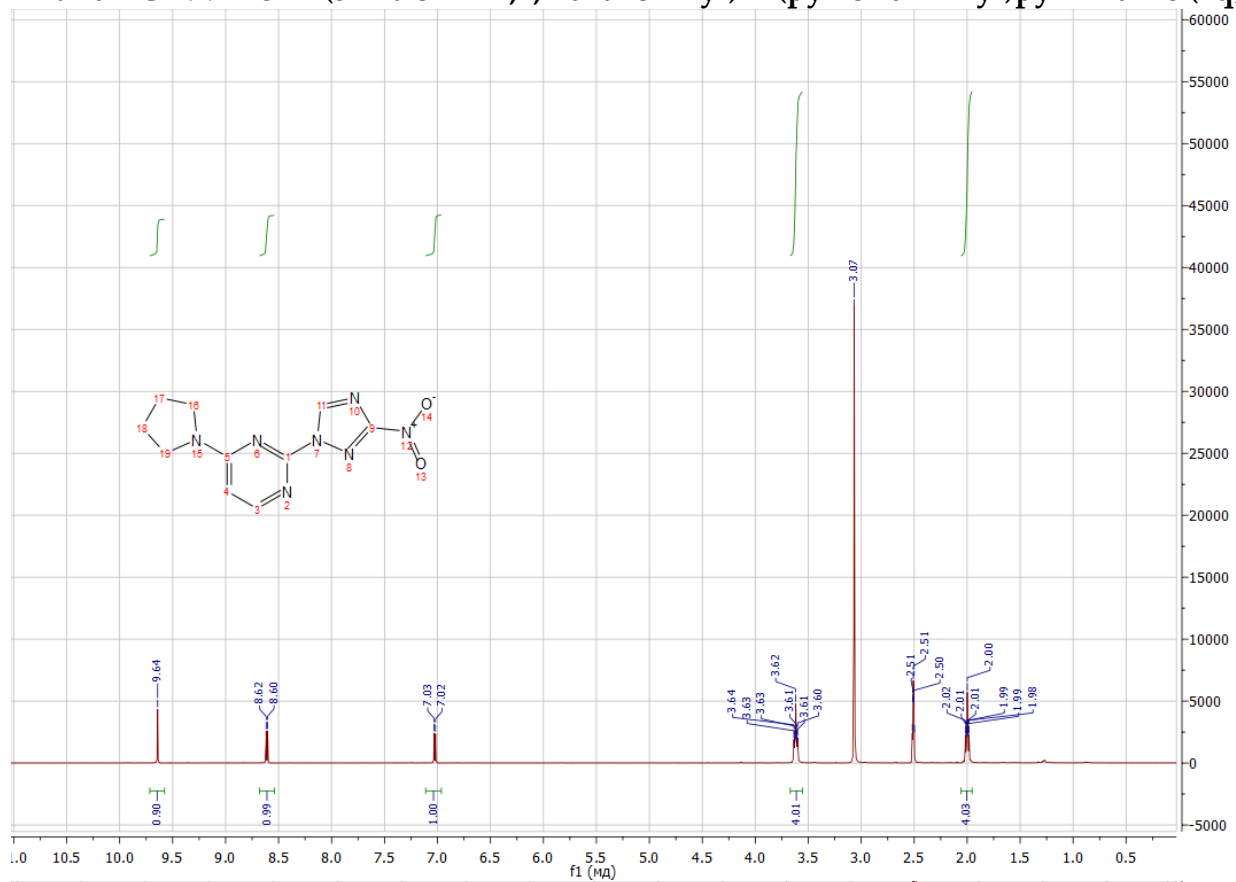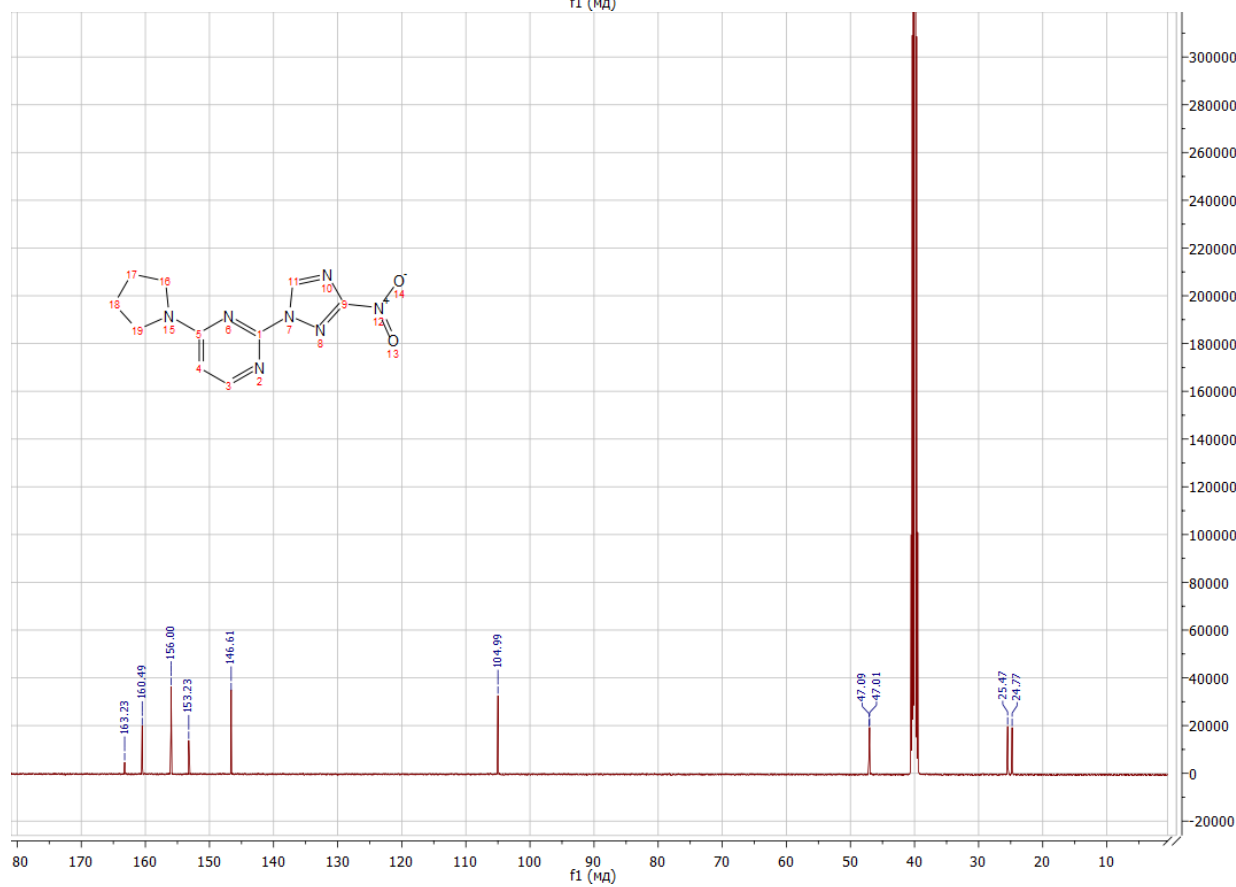



# <sup>1</sup>H and <sup>13</sup>C NMR of 2-(3-nitro-1*H*-1,2,4-triazol-1-yl)-*N*-propylpyrimidin-4-amine (1r)

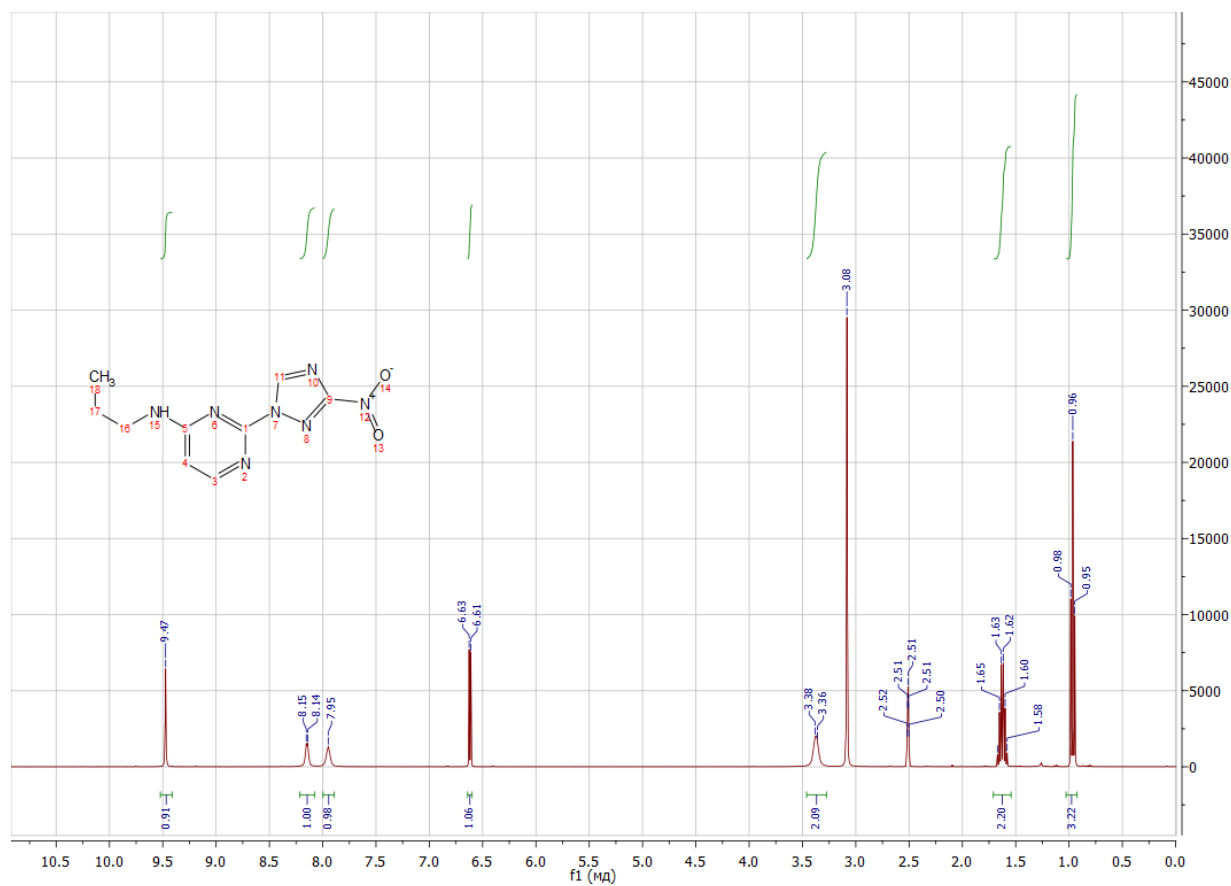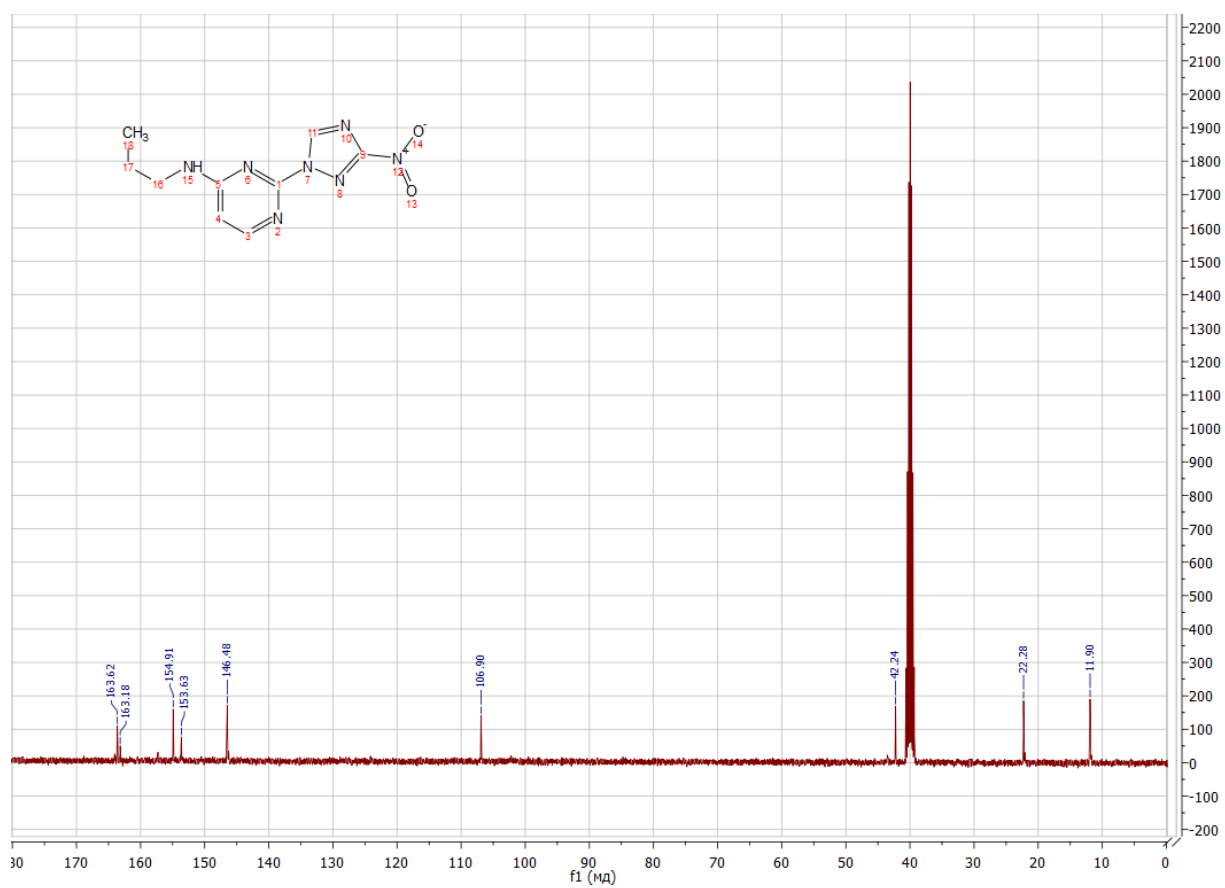

# <sup>1</sup>H and <sup>13</sup>C NMR of *N*-(4-methoxybenzyl)-2-(3-nitro-1*H*-1,2,4-triazol-1-yl)pyrimidin-4-amine (1s)

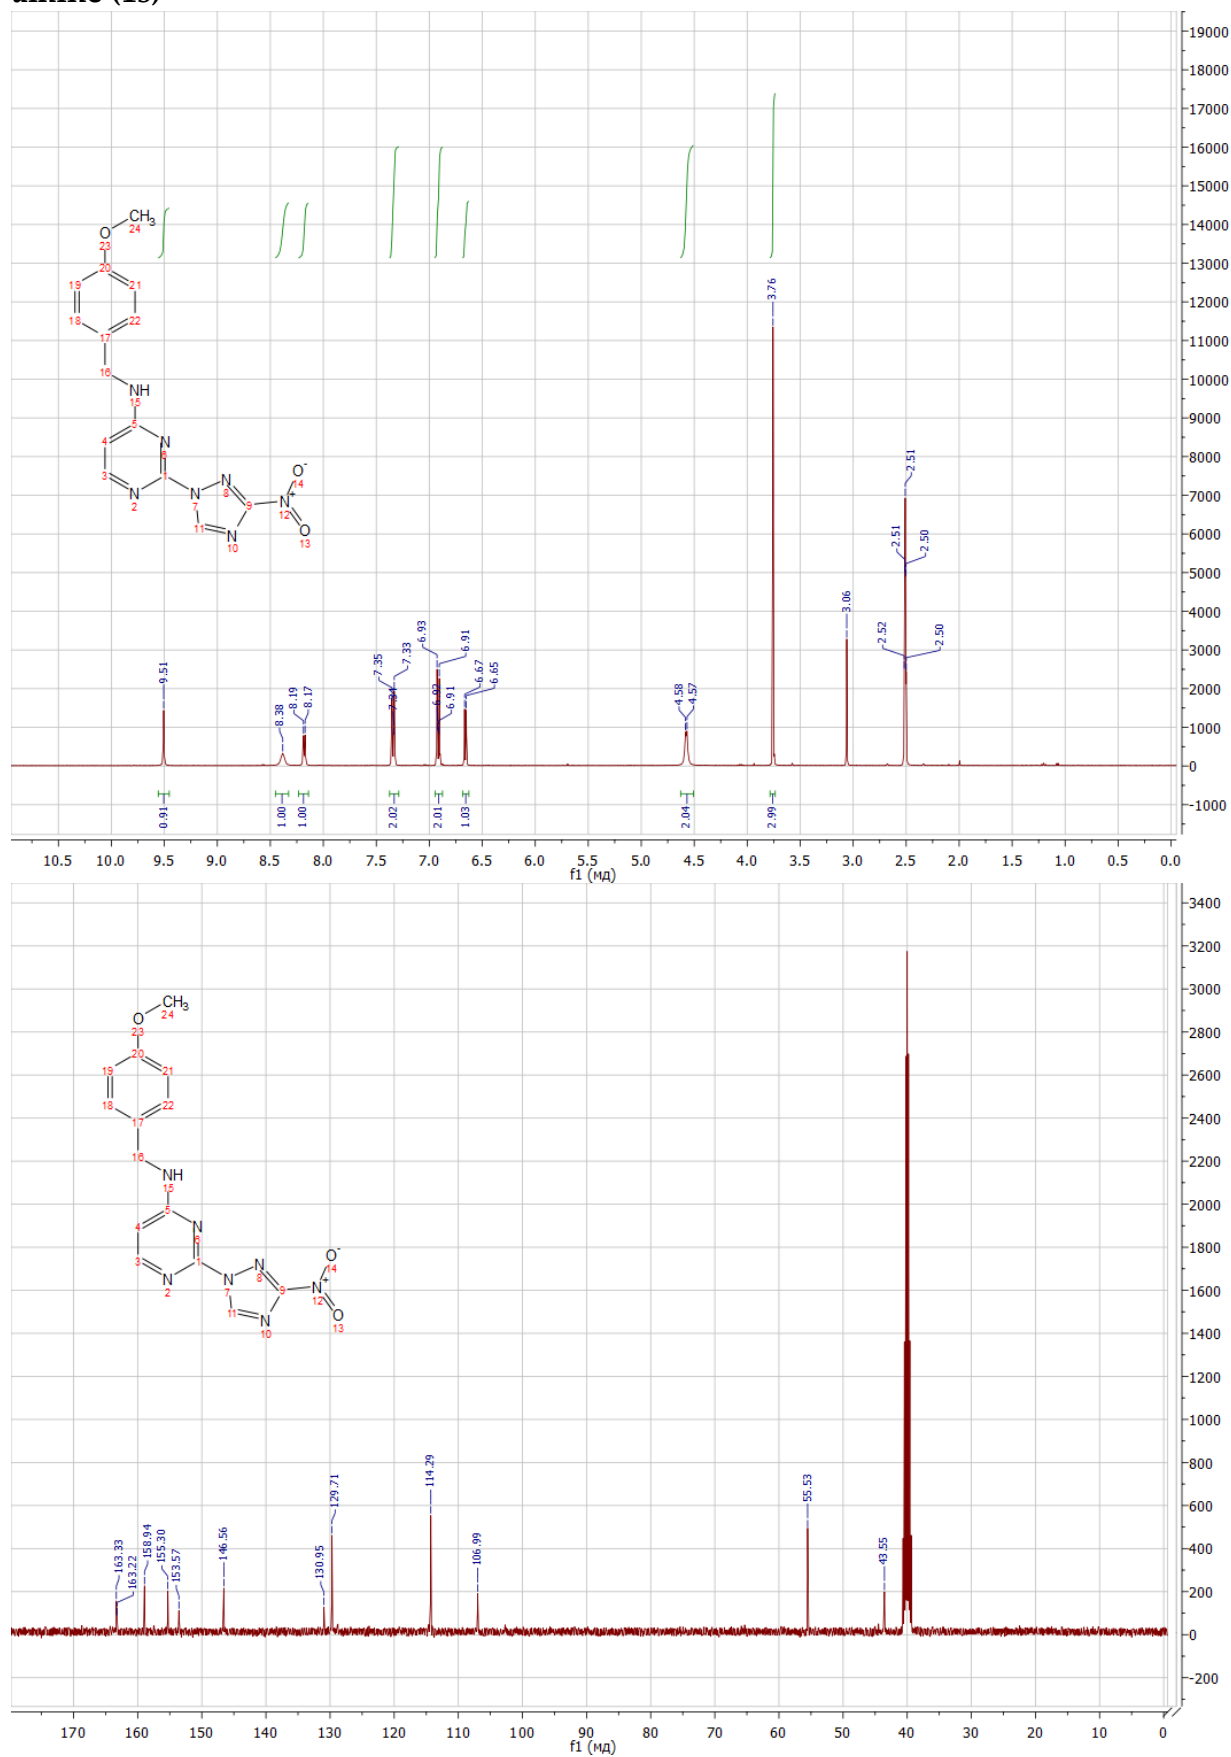

# $^1\text{H}$ and $^{13}\text{C}$ NMR of 2-chloro-4-(3-nitro-1*H*-1,2,4-triazol-1-yl)pyrimidine (5)

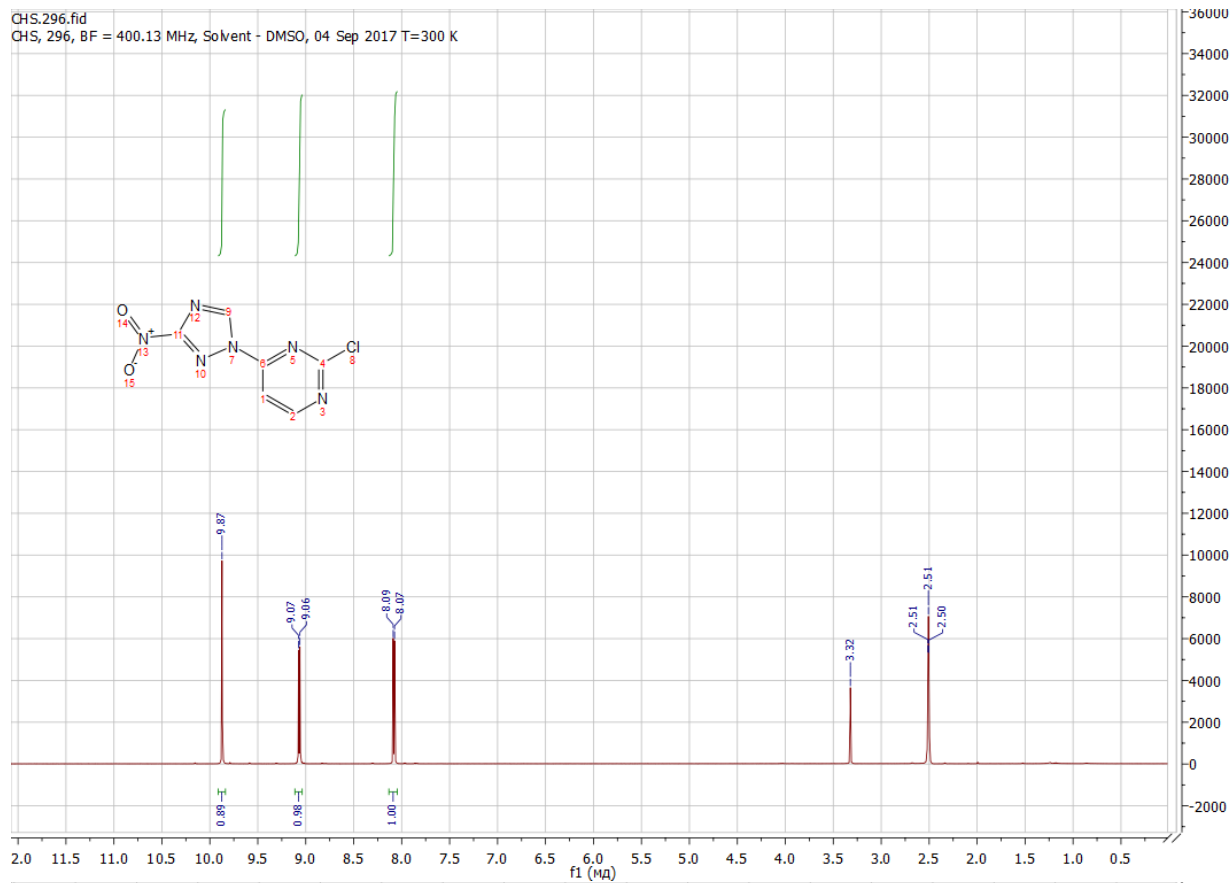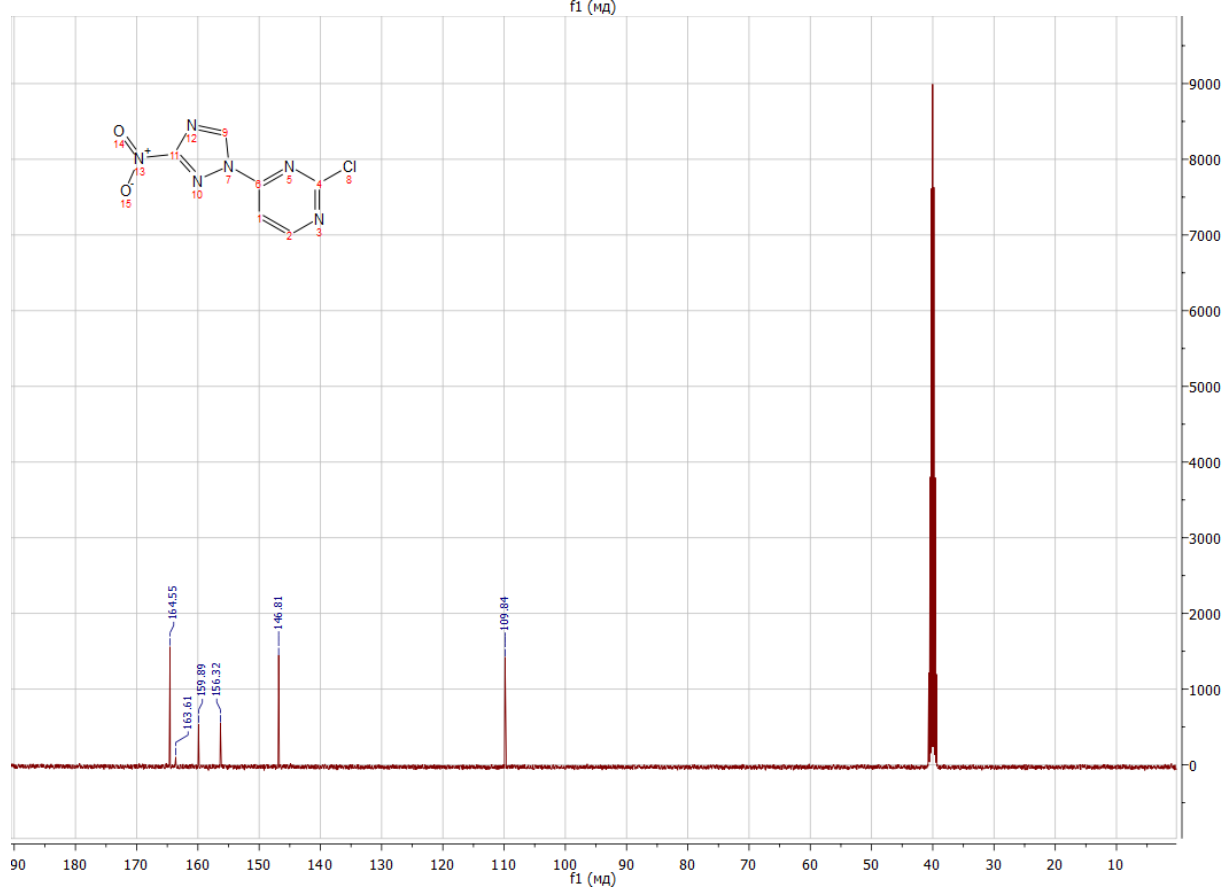

# <sup>1</sup>H and <sup>13</sup>C NMR of 2-((4-(3-nitro-1H-1,2,4-triazol-1-yl)pyrimidin-2-yl)amino)ethan-1-ol (2a)

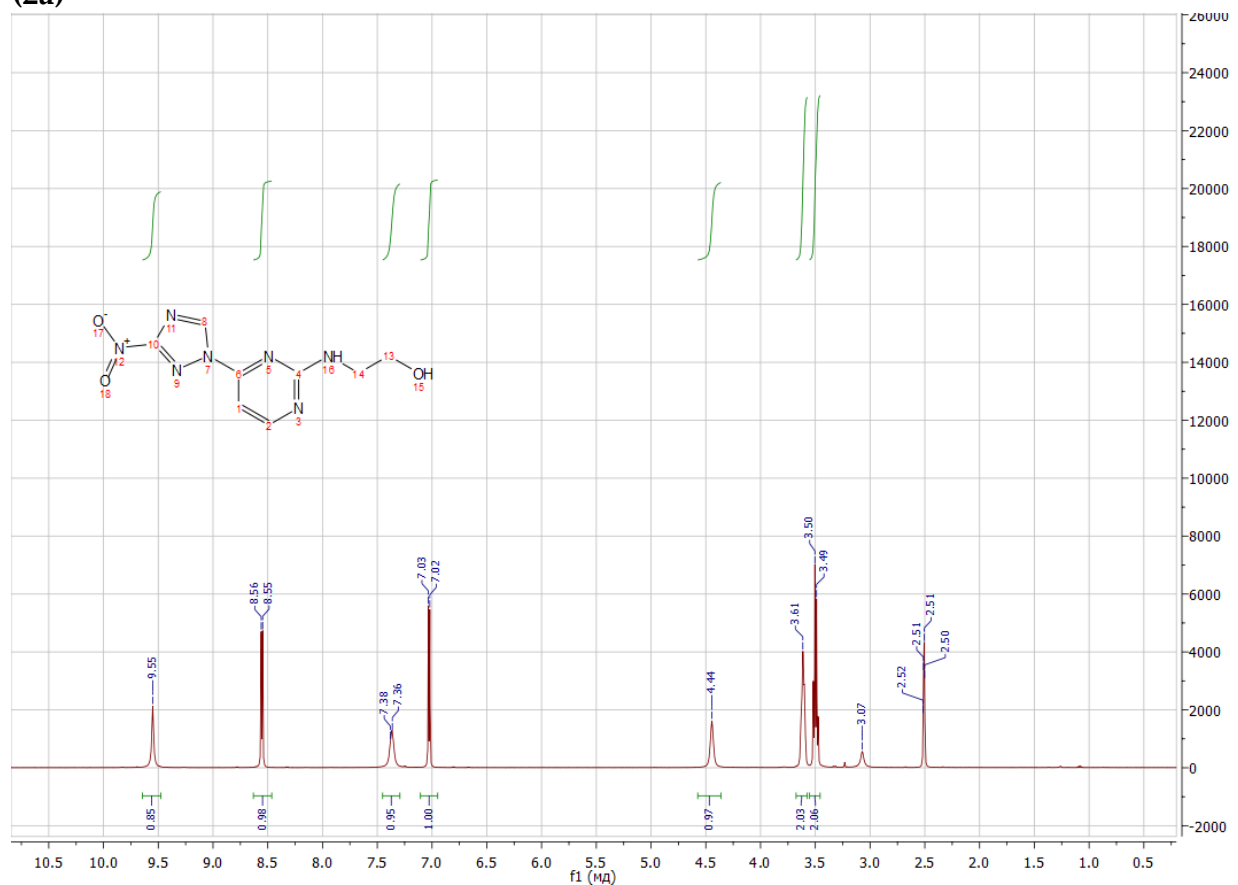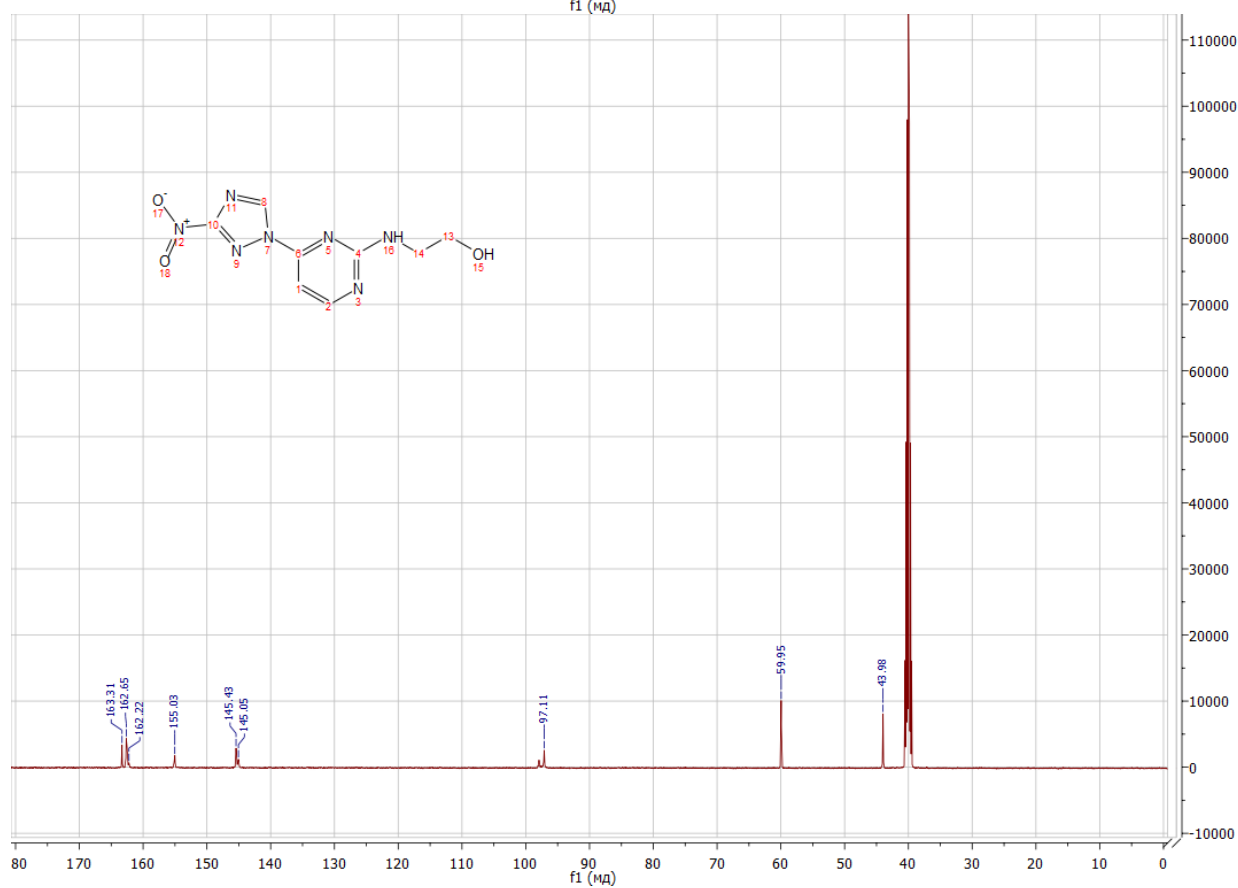

**<sup>1</sup>H and <sup>13</sup>C NMR of *N,N*-dimethyl-4-(3-nitro-1*H*-1,2,4-triazol-1-yl)pyrimidin-2-amine (2b)**

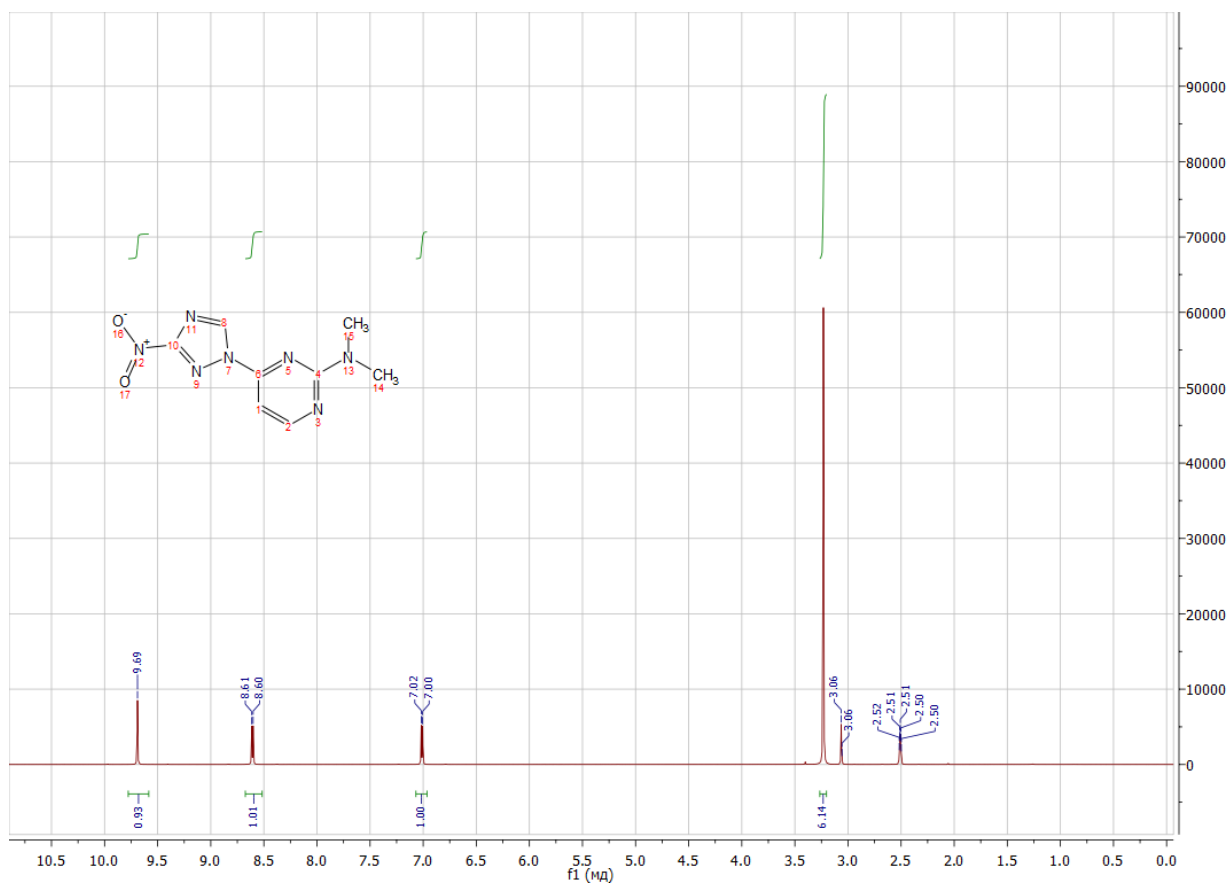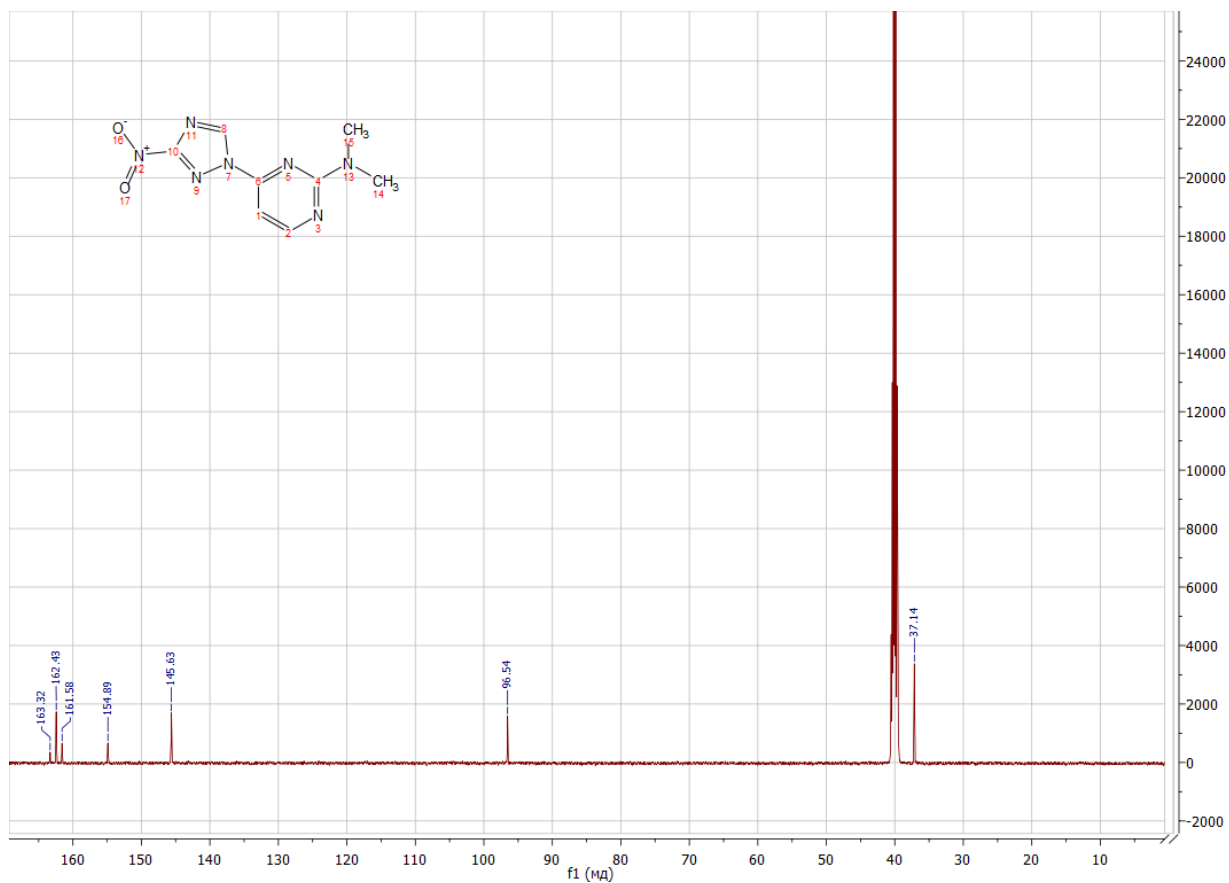

# $^1\text{H}$ and $^{13}\text{C}$ NMR of *N*-methyl-4-(3-nitro-1*H*-1,2,4-triazol-1-yl)pyrimidin-2-amine (2c)

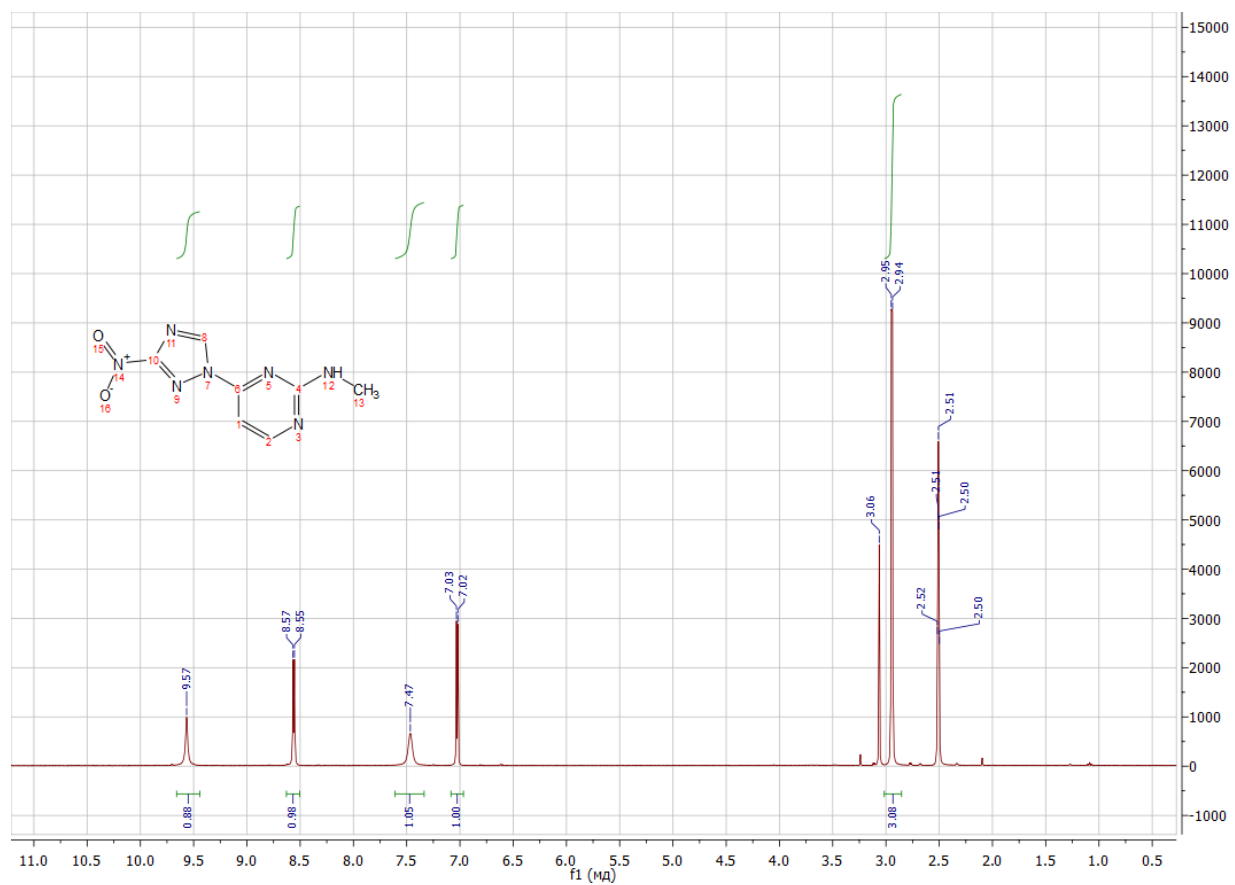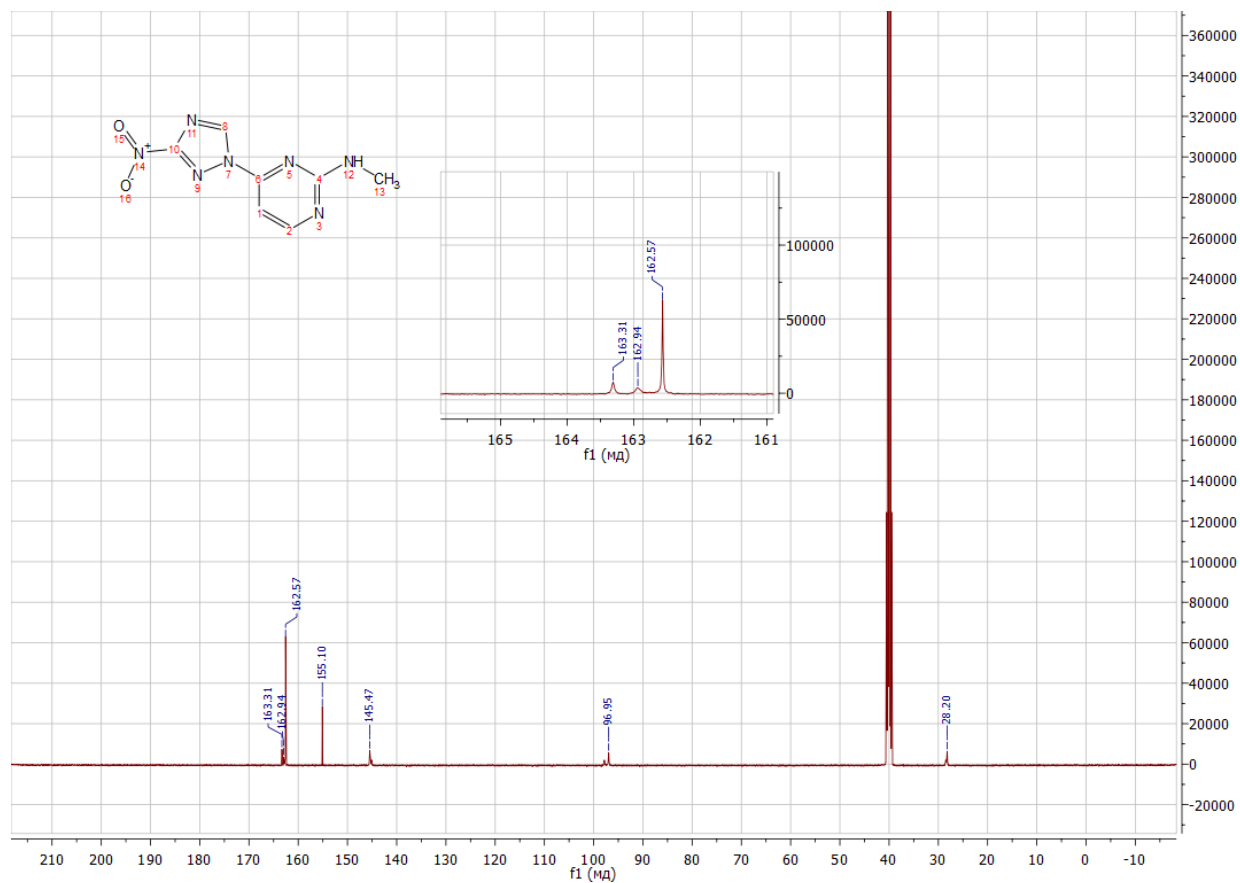

**<sup>1</sup>H and <sup>13</sup>C NMR of *N*-benzyl-*N*-methyl-4-(3-nitro-1*H*-1,2,4-triazol-1-yl)pyrimidin-2-amine (2d)**

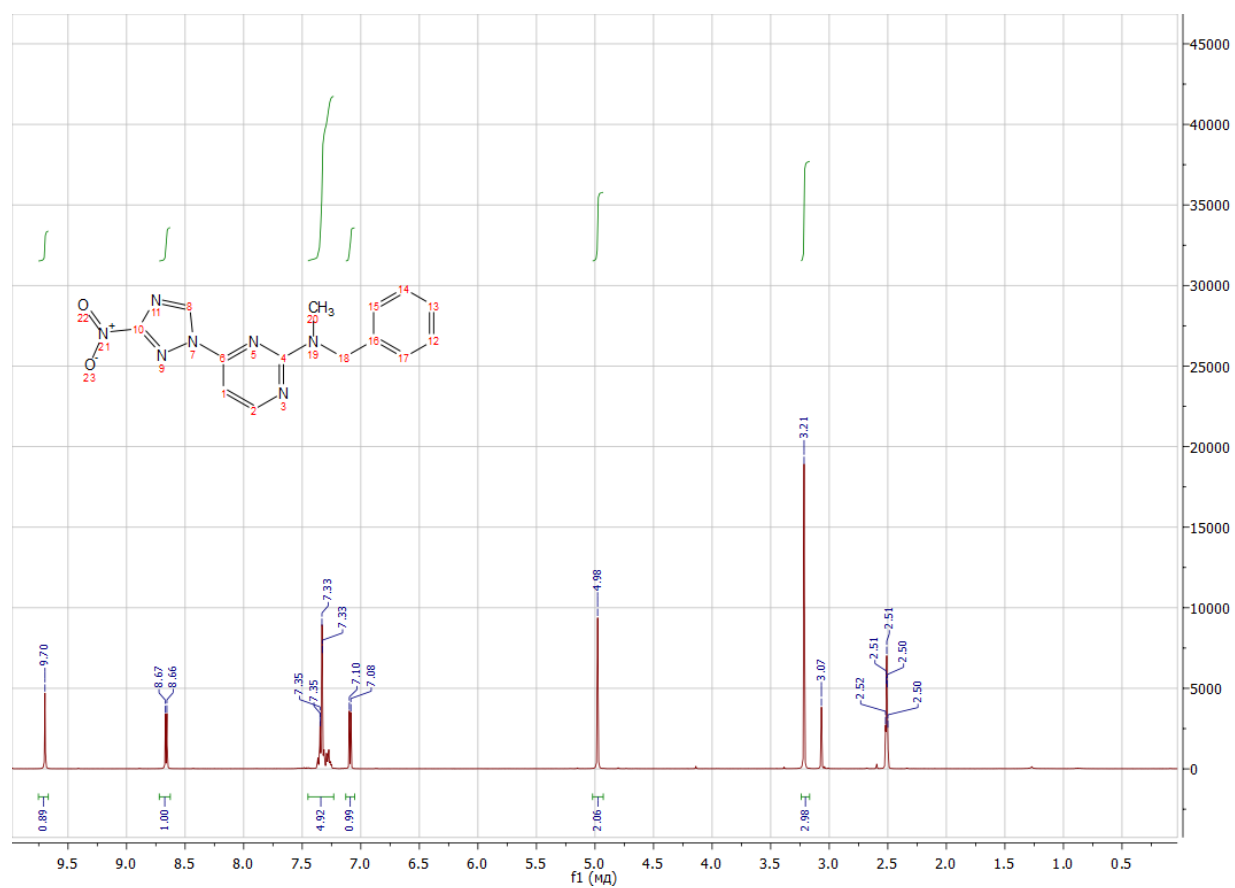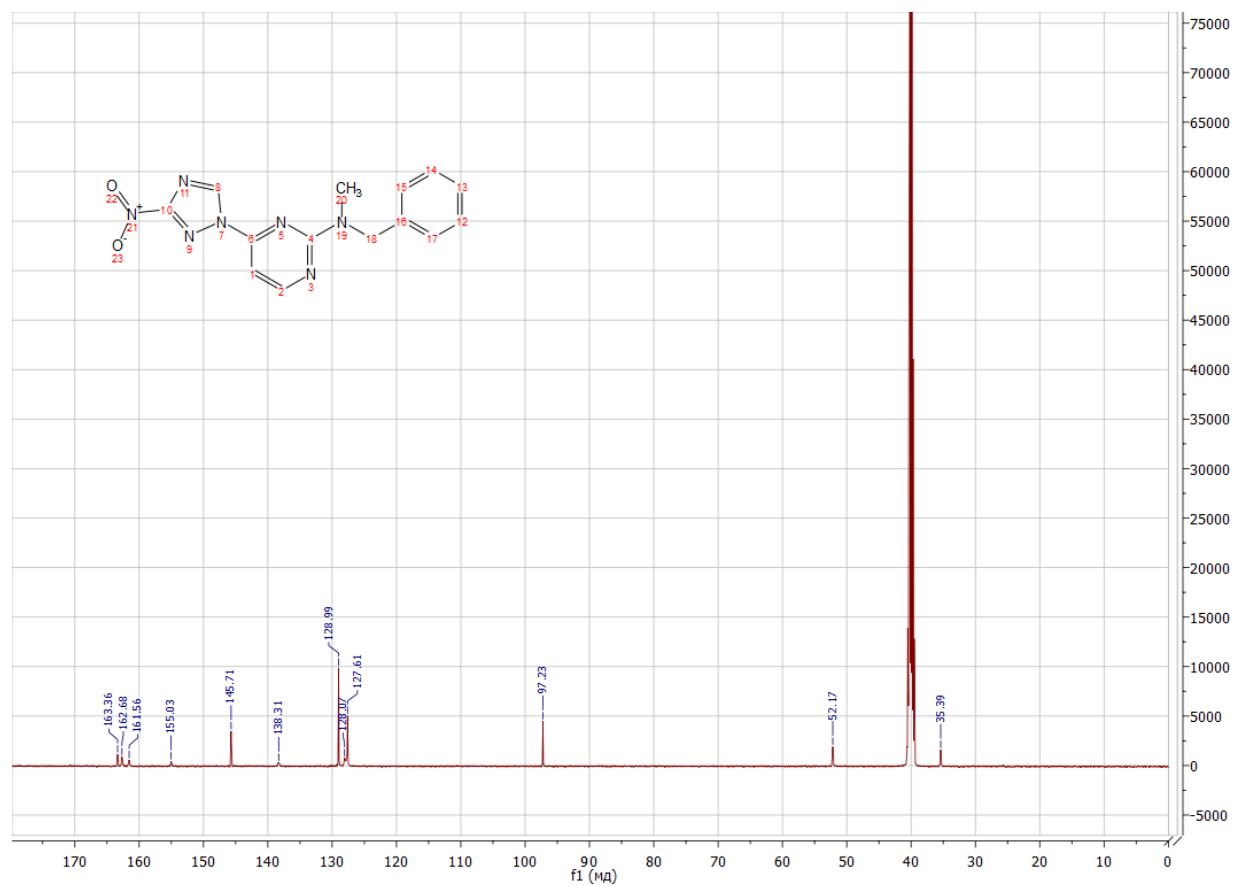

# <sup>1</sup>H and <sup>13</sup>C NMR of *N*-(4-methoxyphenyl)-4-(3-nitro-1*H*-1,2,4-triazol-1-yl)pyrimidin-2-amine (2e)

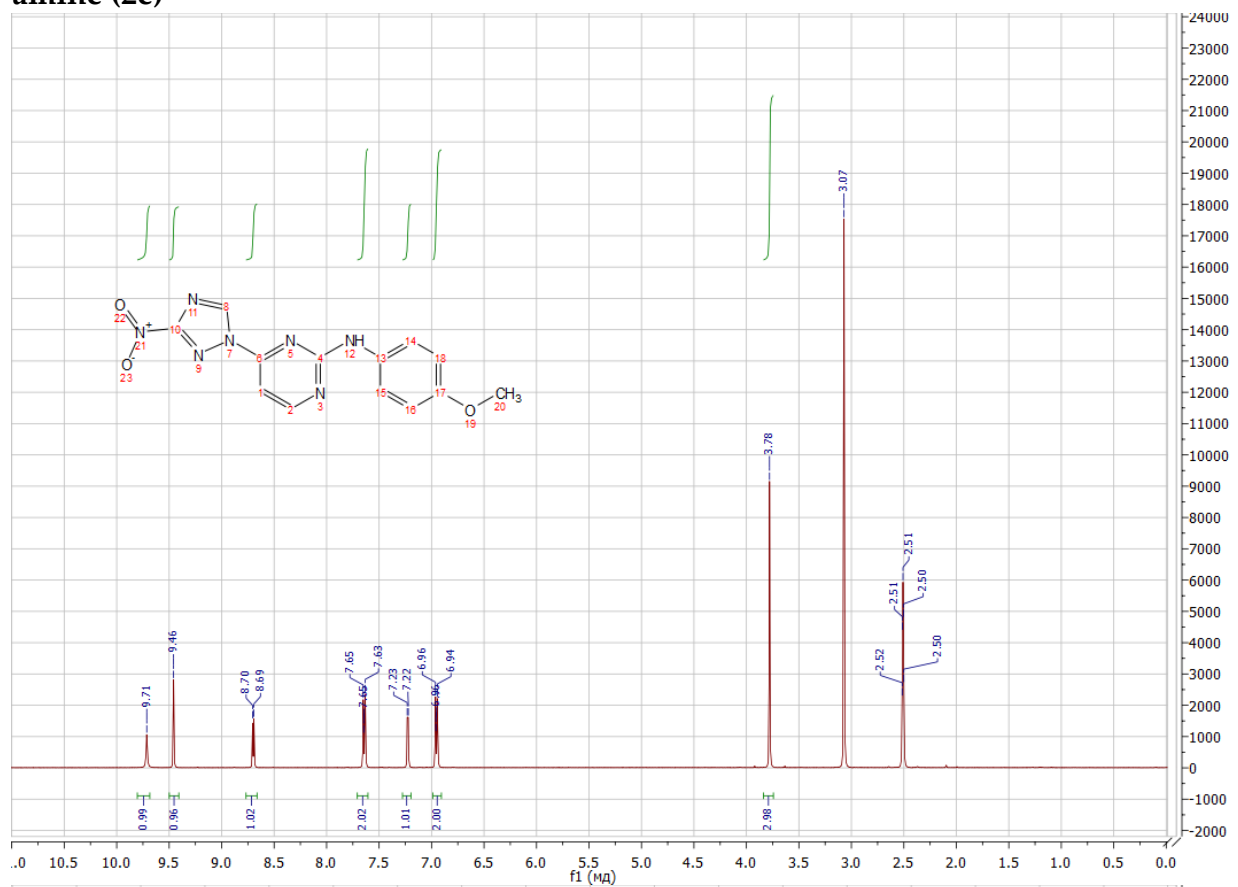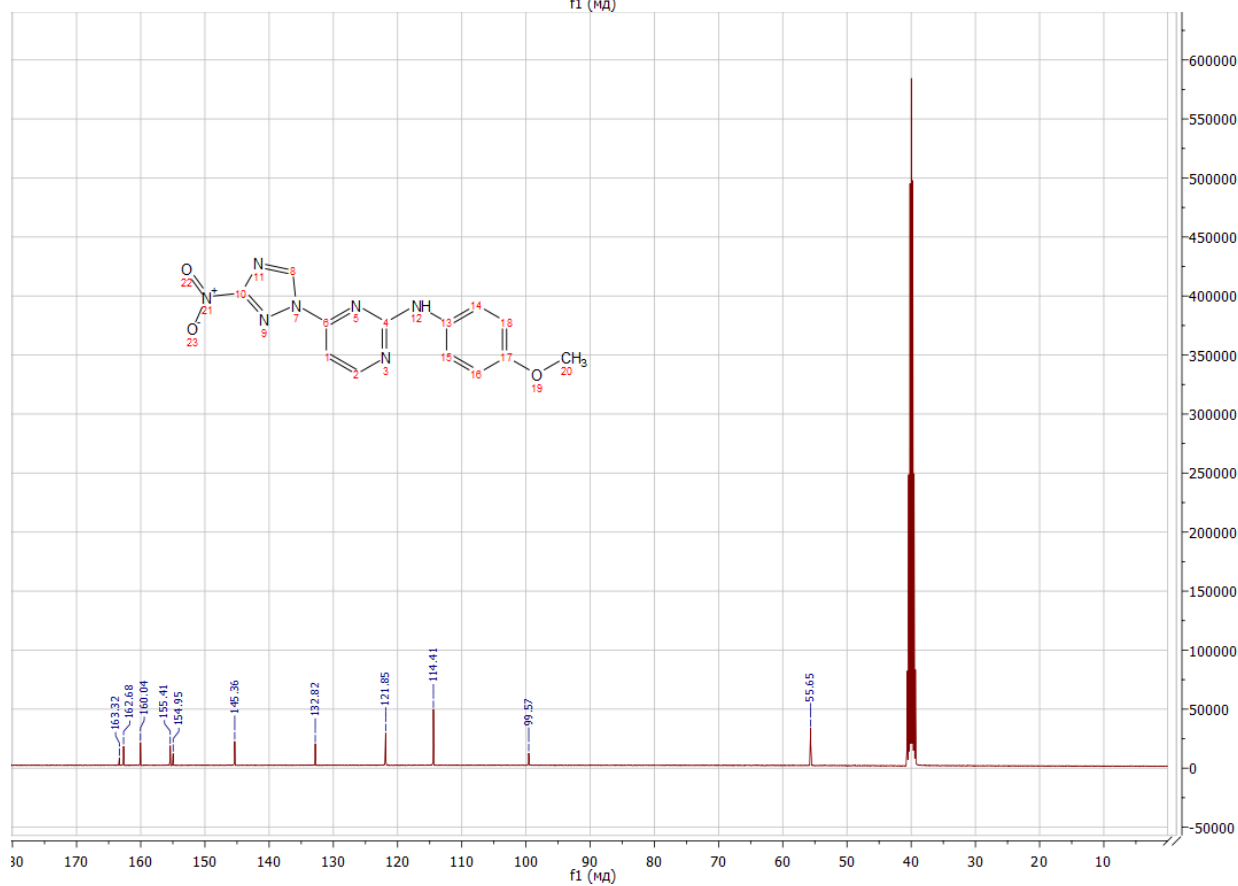



<sup>1</sup>H and <sup>13</sup>C NMR of 3-((4-(3-nitro-1H-1,2,4-triazol-1-yl)pyrimidin-2-yl)amino)propan-1-ol (2f)

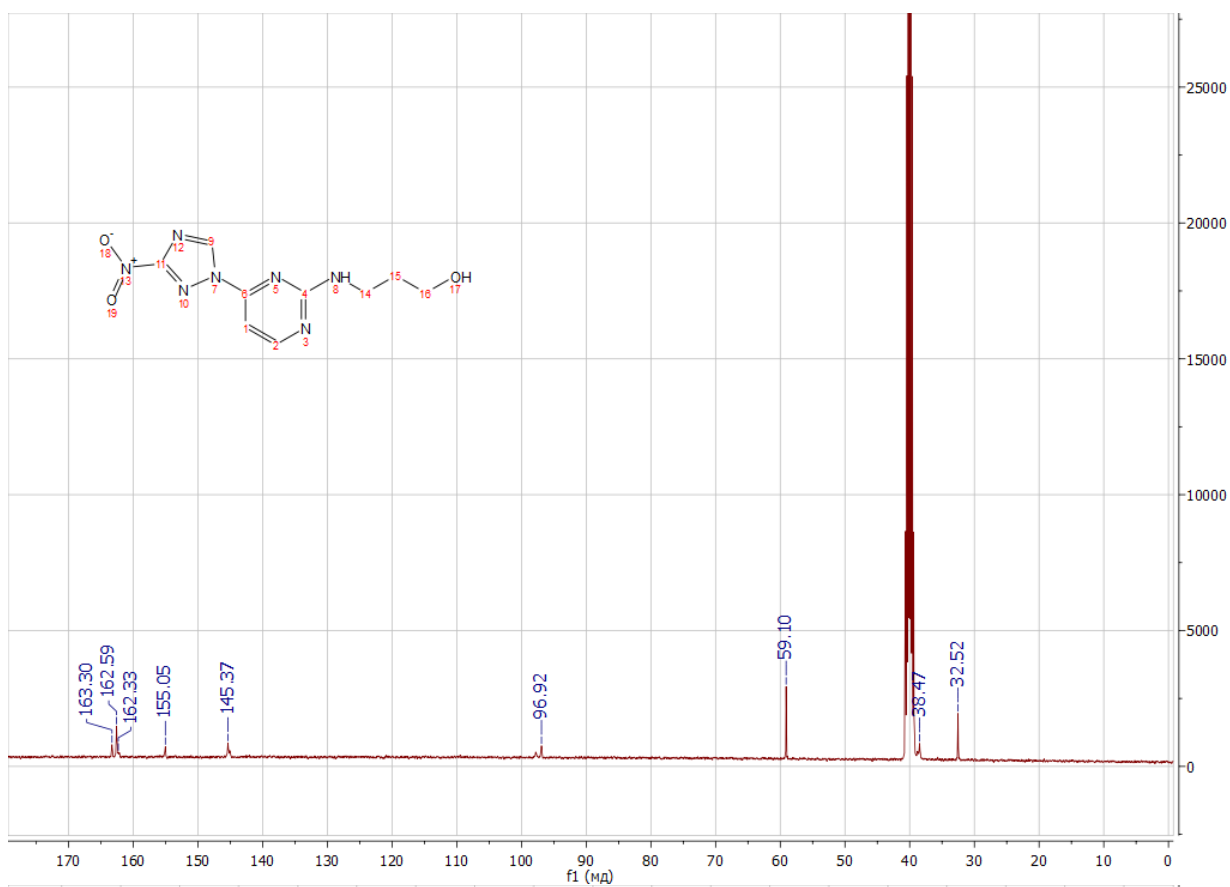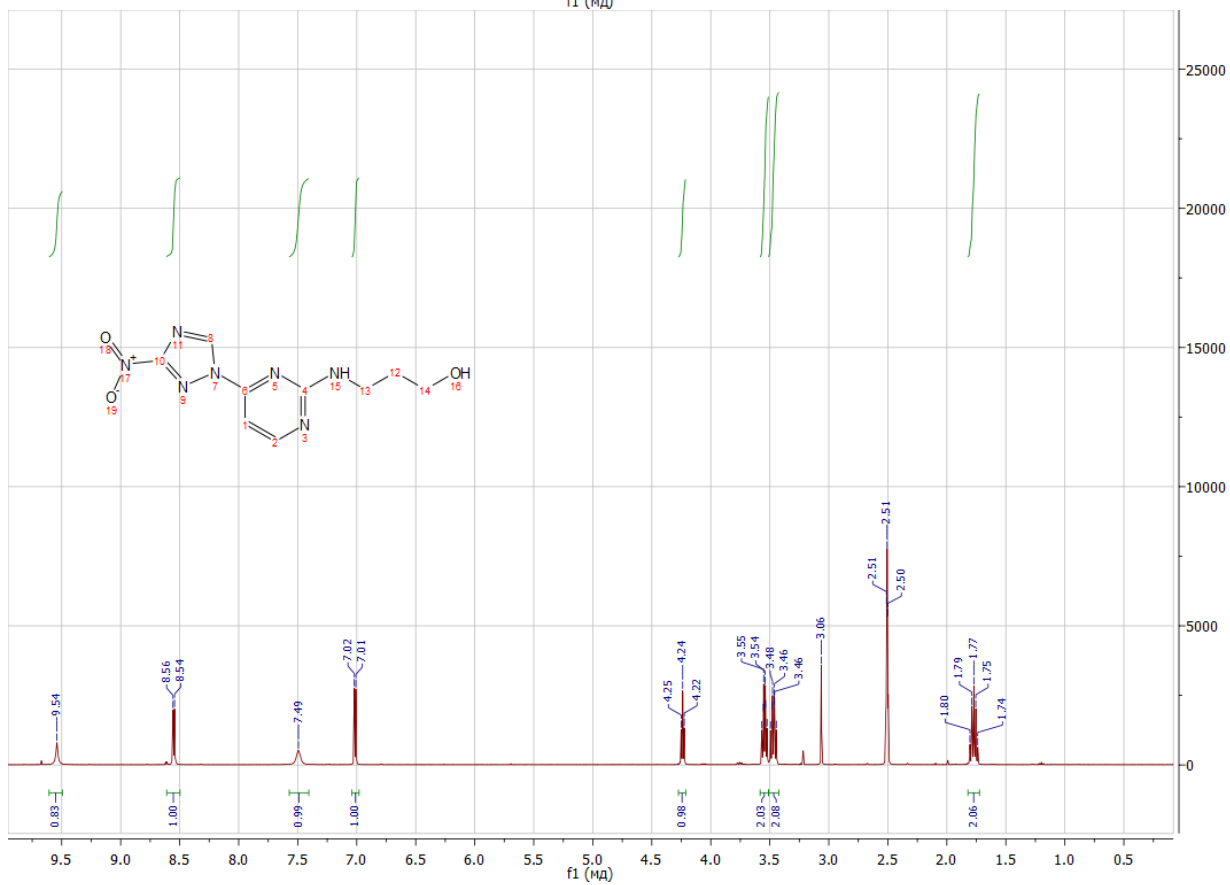

# <sup>1</sup>H and <sup>13</sup>C NMR of *N*-ethyl-4-(3-nitro-1*H*-1,2,4-triazol-1-yl)pyrimidin-2-amine (2g)

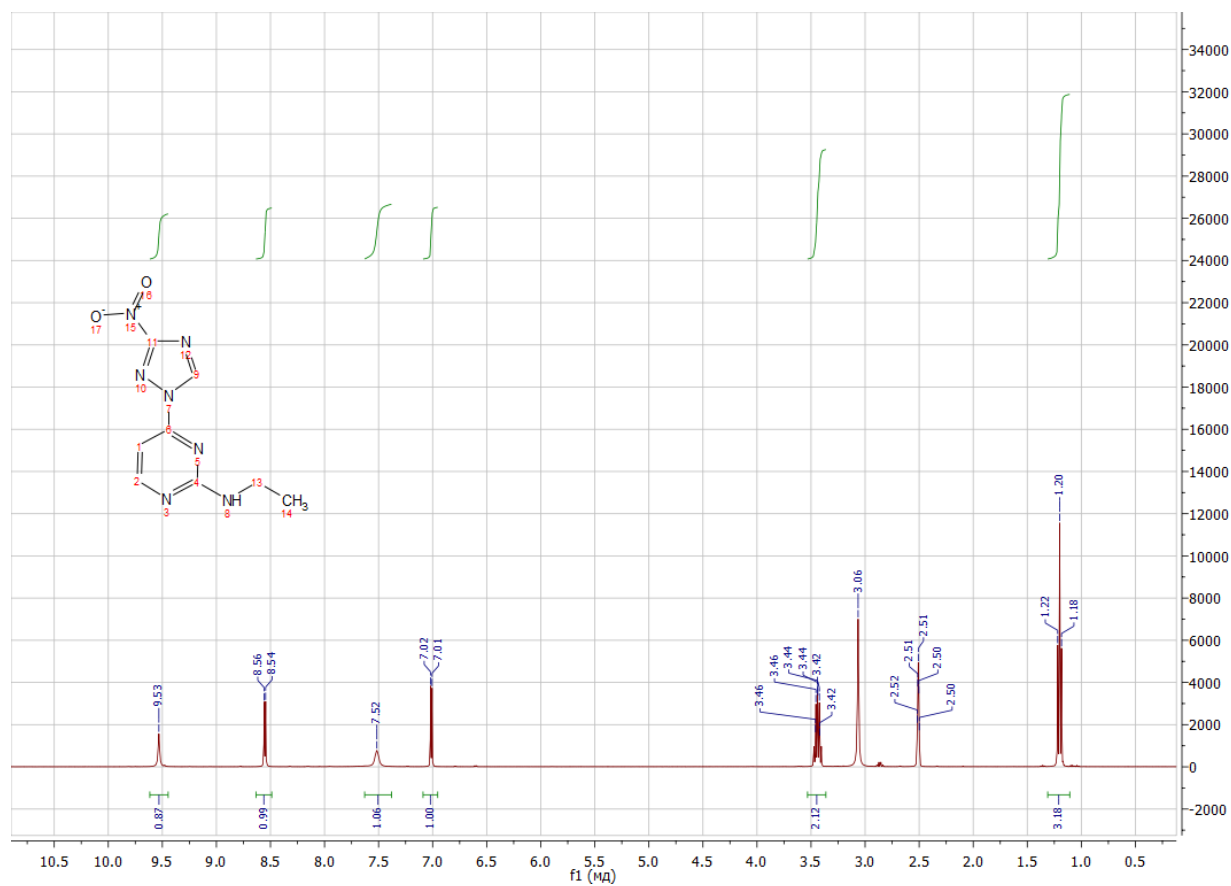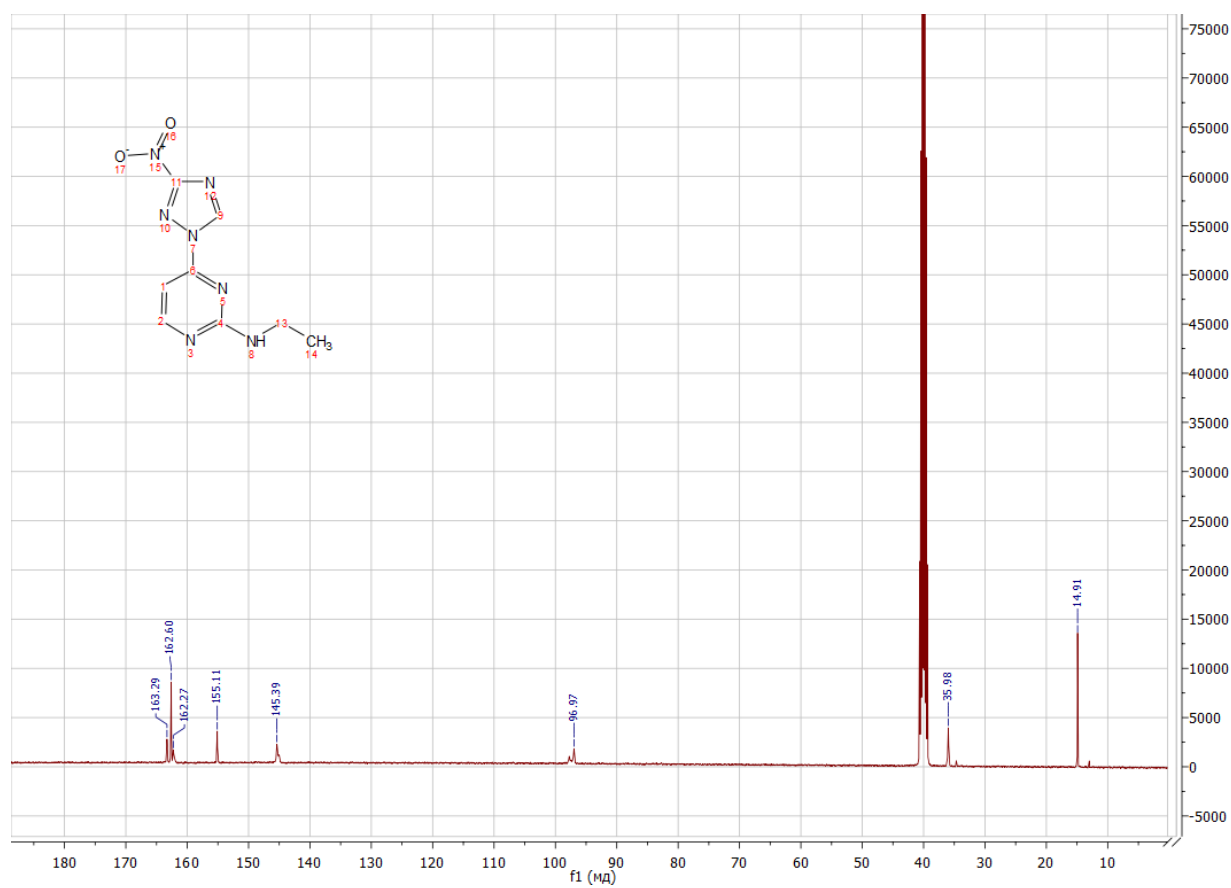

# <sup>1</sup>H and <sup>13</sup>C NMR of 4-(4-(3-nitro-1H-1,2,4-triazol-1-yl)pyrimidin-2-yl)morpholine (2h)

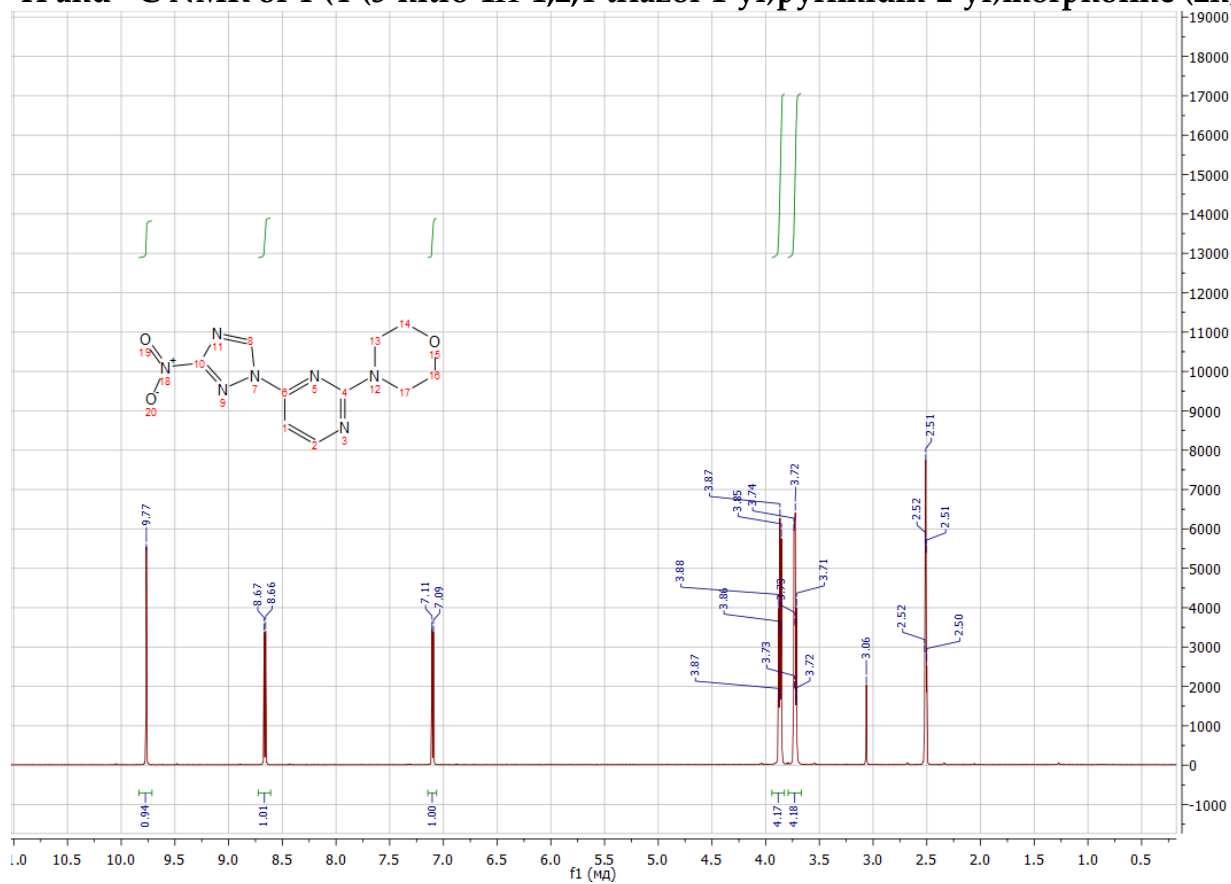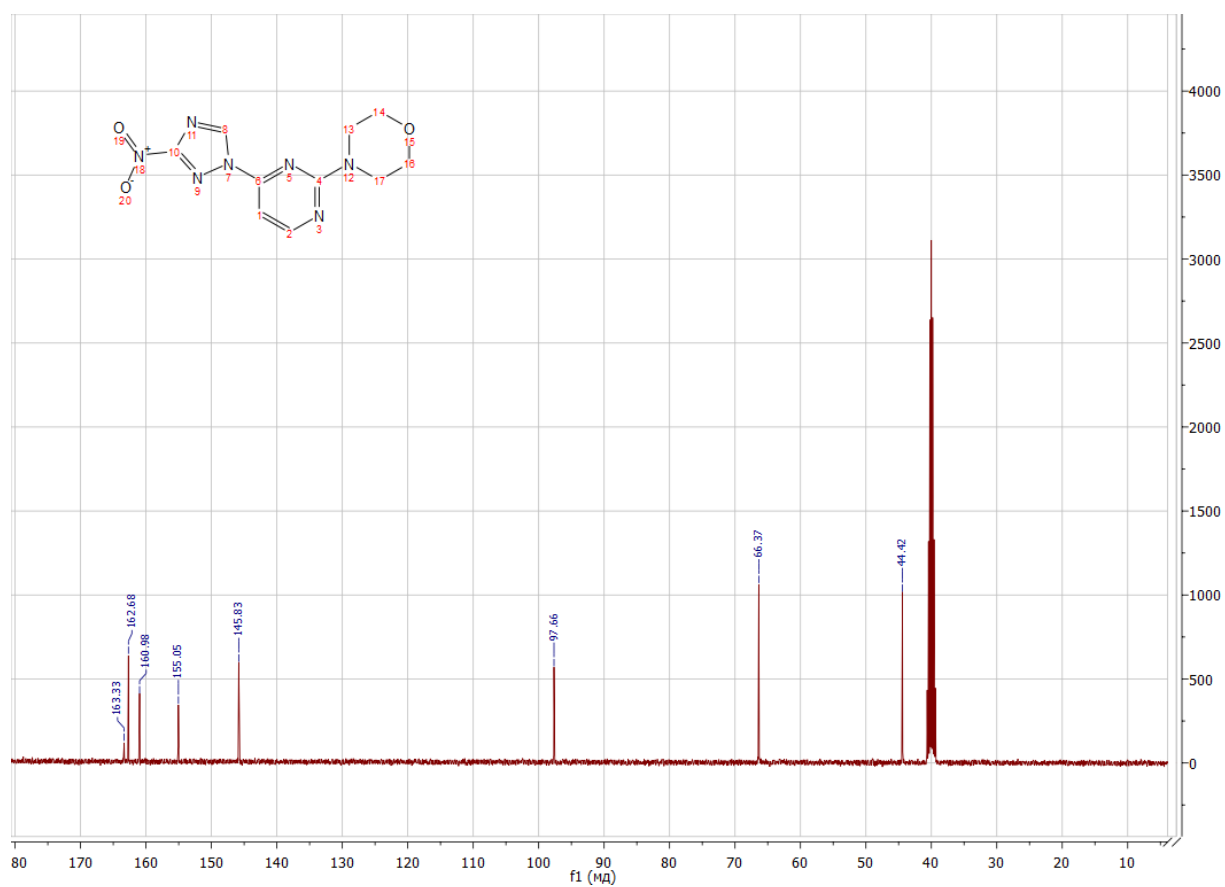

# $^1\text{H}$ and $^{13}\text{C}$ NMR of 2-(4-methylpiperazin-1-yl)-4-(3-nitro-1*H*-1,2,4-triazol-1-yl)pyrimidine (2i)

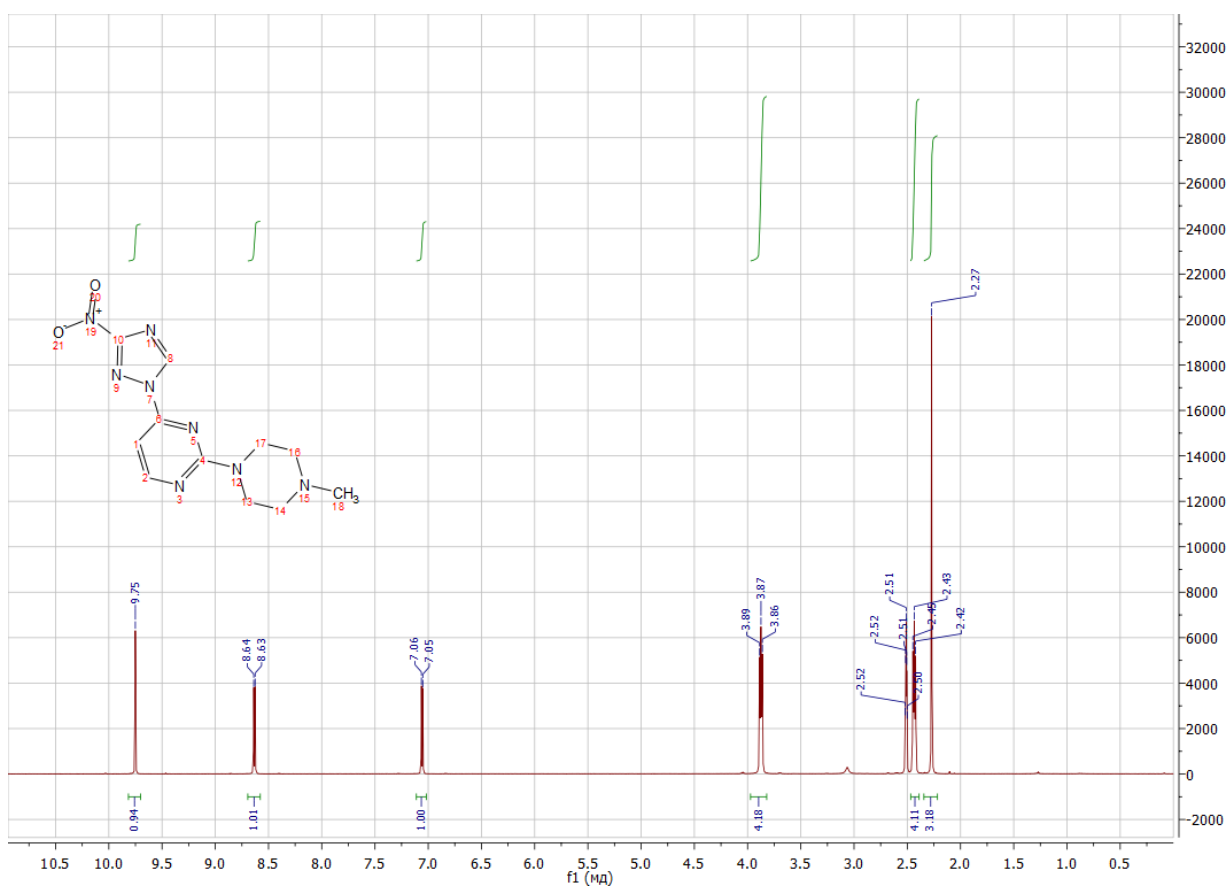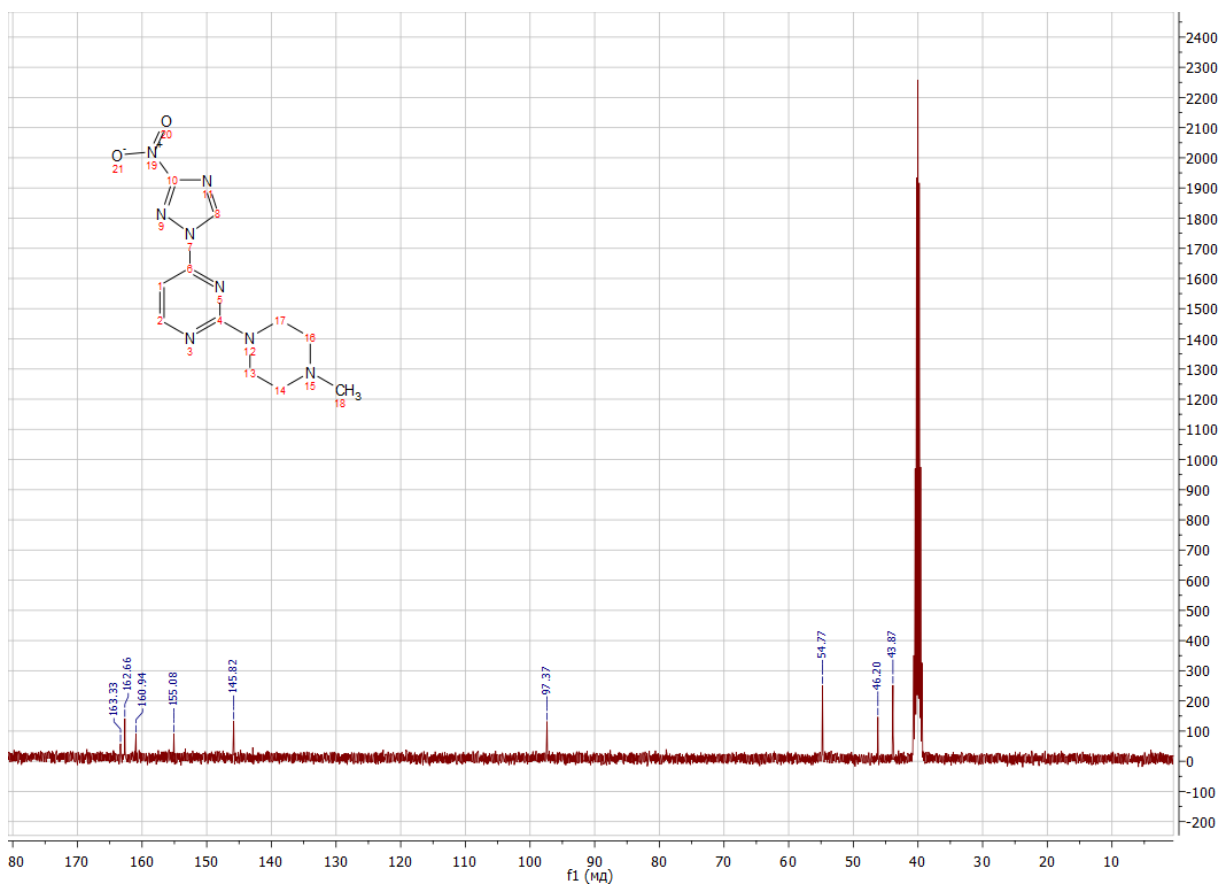

**$^1\text{H}$  and  $^{13}\text{C}$  NMR of *N*-benzyl-4-(3-nitro-1*H*-1,2,4-triazol-1-yl)pyrimidin-2-amine (2j)**

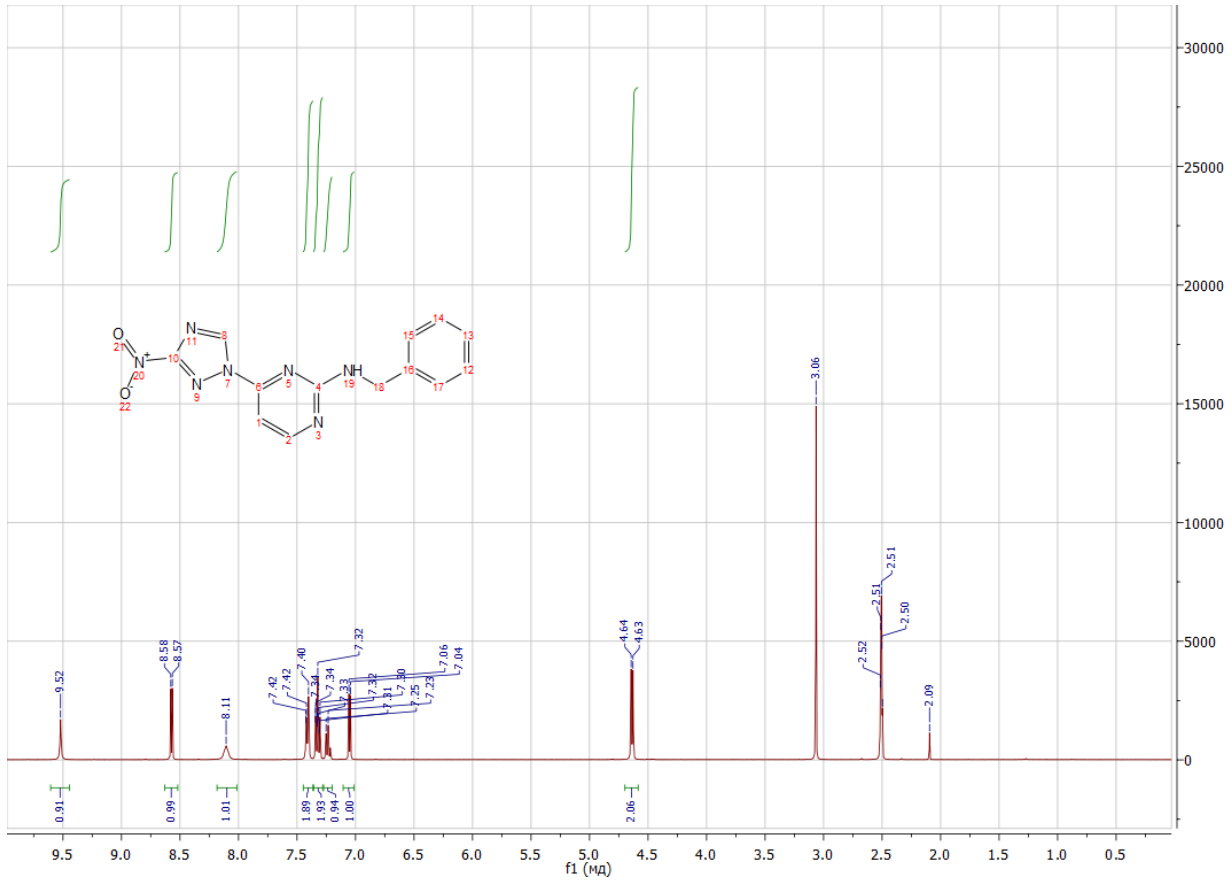

**<sup>1</sup>H and <sup>13</sup>C NMR of *N*-Isobutyl-4-(3-nitro-1*H*-1,2,4-triazol-1-yl)pyrimidin-2-amine (2k)**

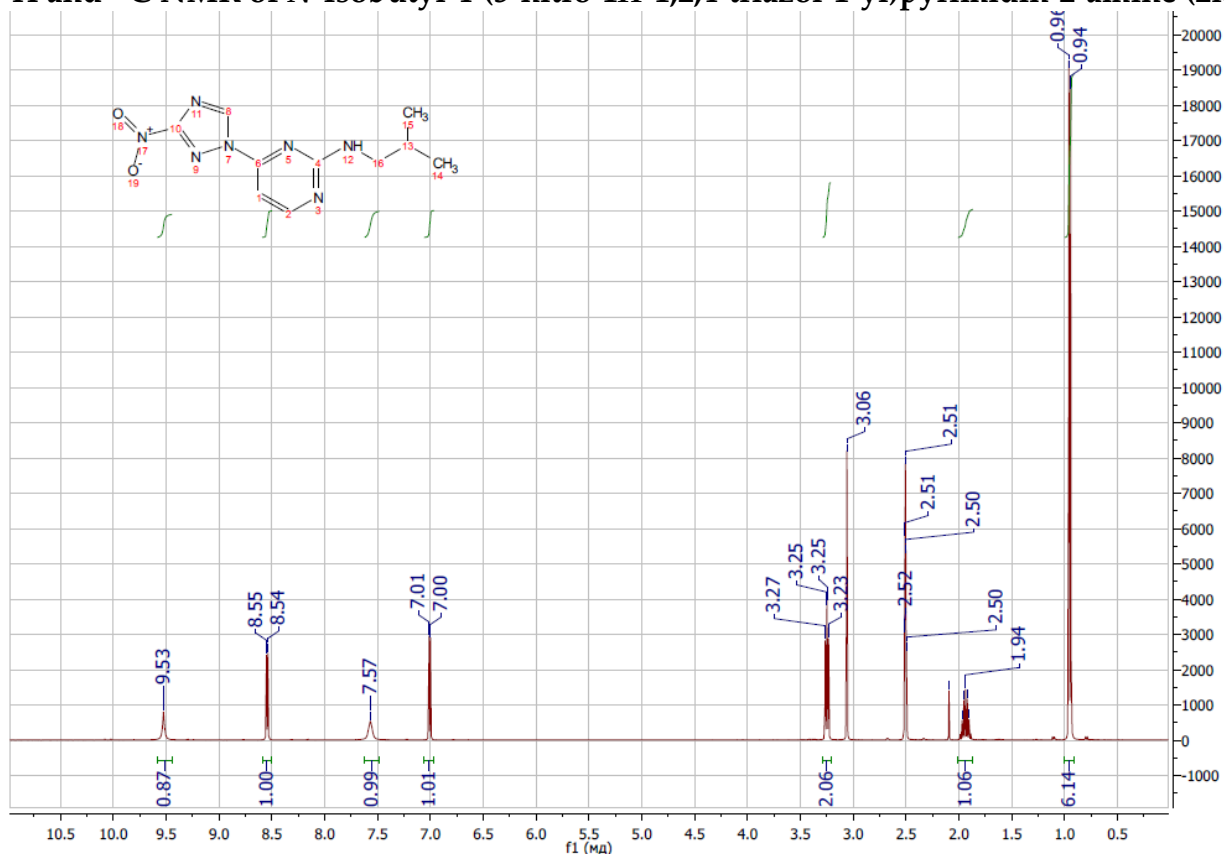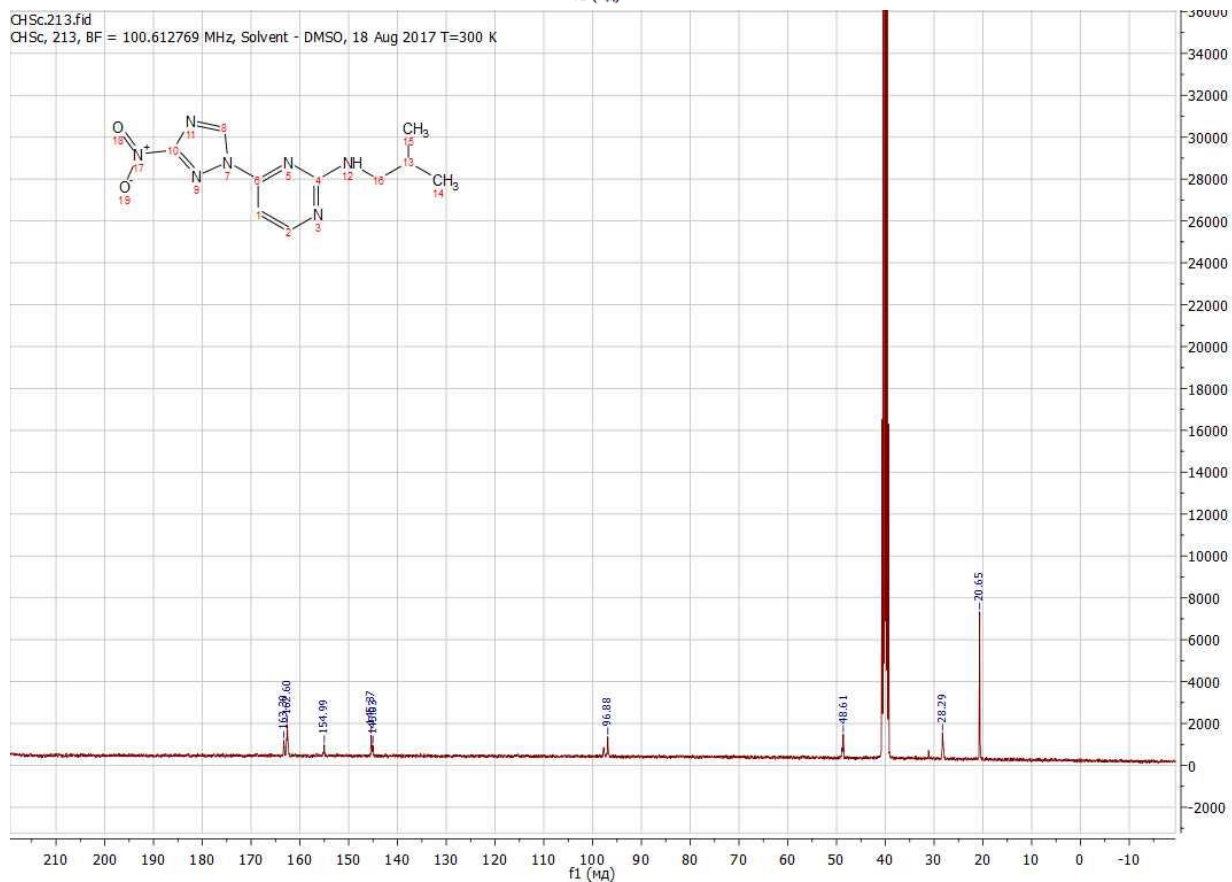

<sup>1</sup>H and <sup>13</sup>C NMR of 2,2'-((4-(3-nitro-1H-1,2,4-triazol-1-yl)pyrimidin-2-yl)azanediyl)bis(ethan-1-ol) (21)

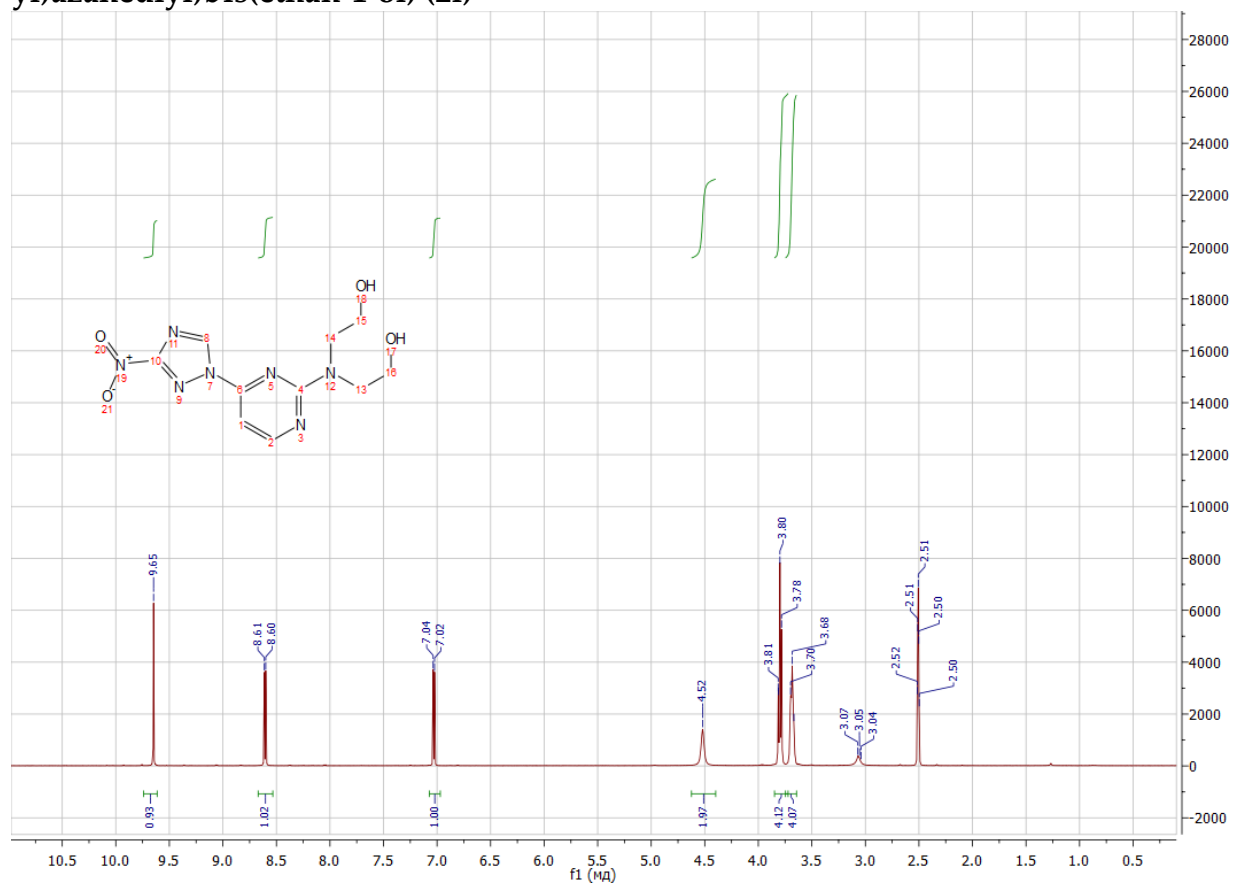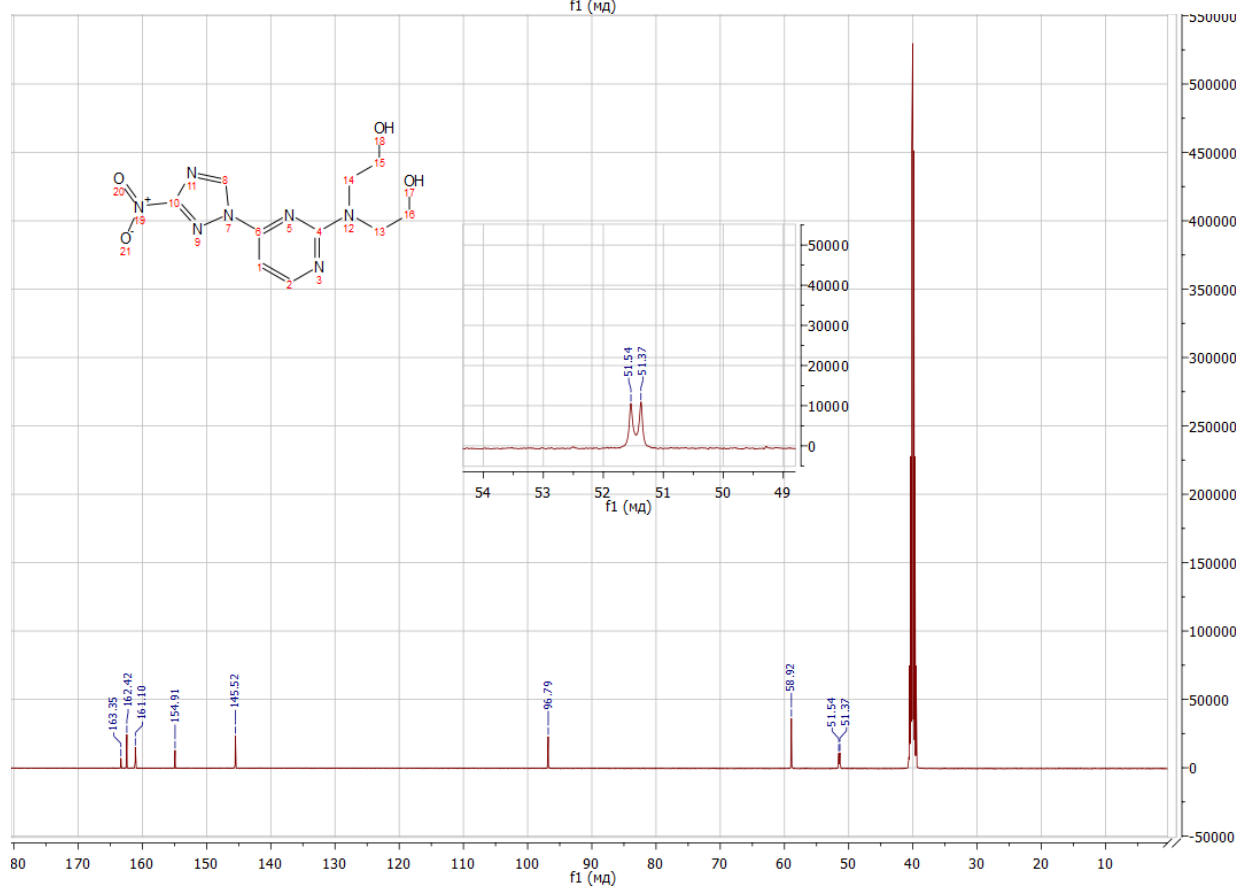

# <sup>1</sup>H and <sup>13</sup>C NMR of 4-(3-nitro-1H-1,2,4-triazol-1-yl)-N-(p-tolyl)pyrimidin-2-amine (2m)

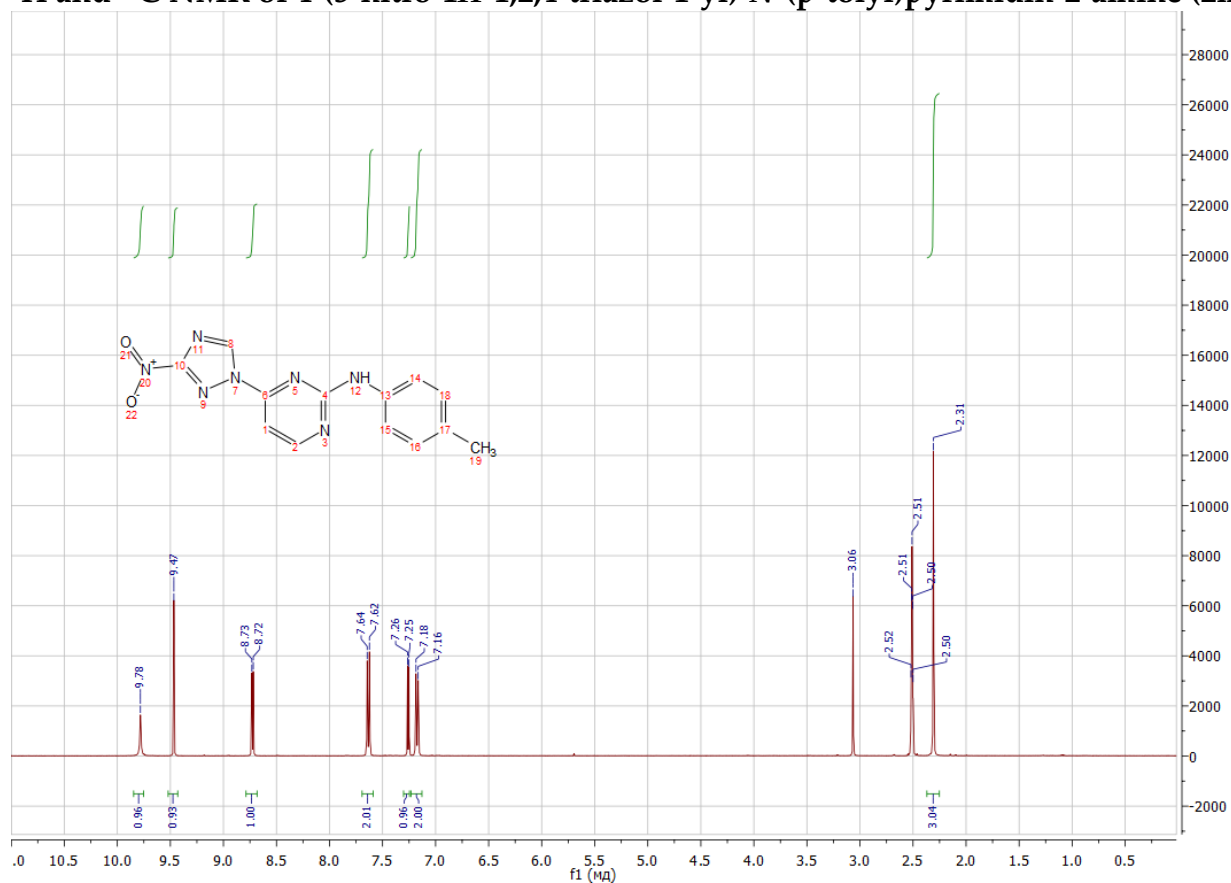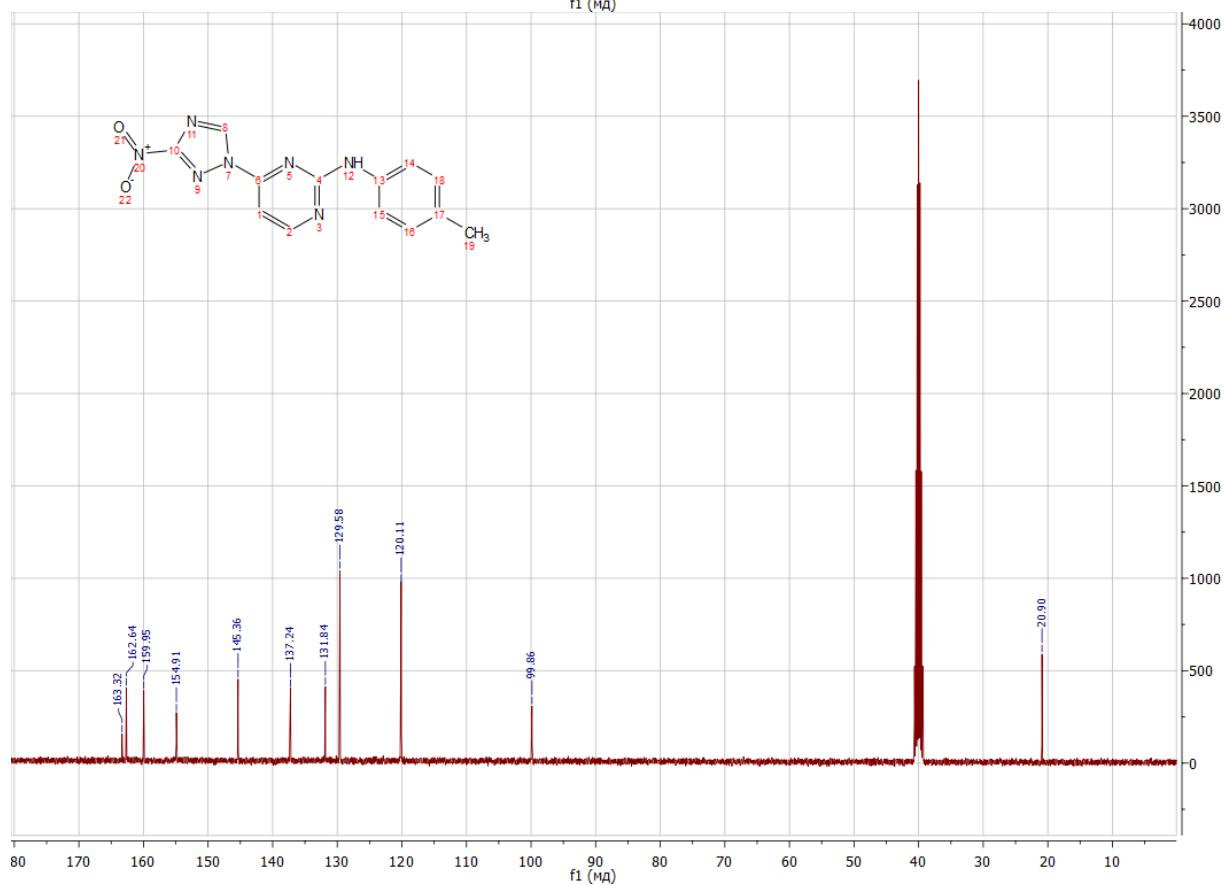



# <sup>1</sup>H and <sup>13</sup>C NMR of *N*-cyclopropyl-4-(3-nitro-1*H*-1,2,4-triazol-1-yl)pyrimidin-2-amine (2n)

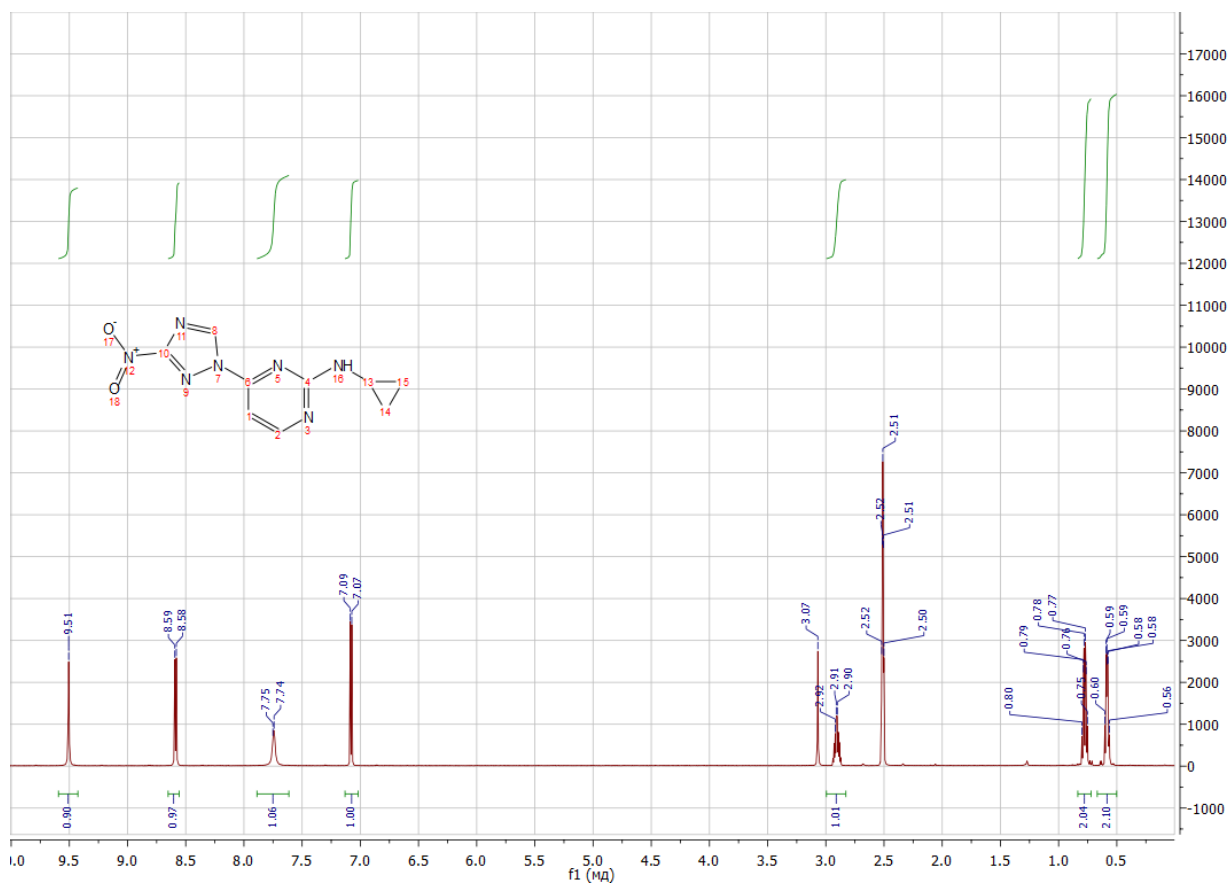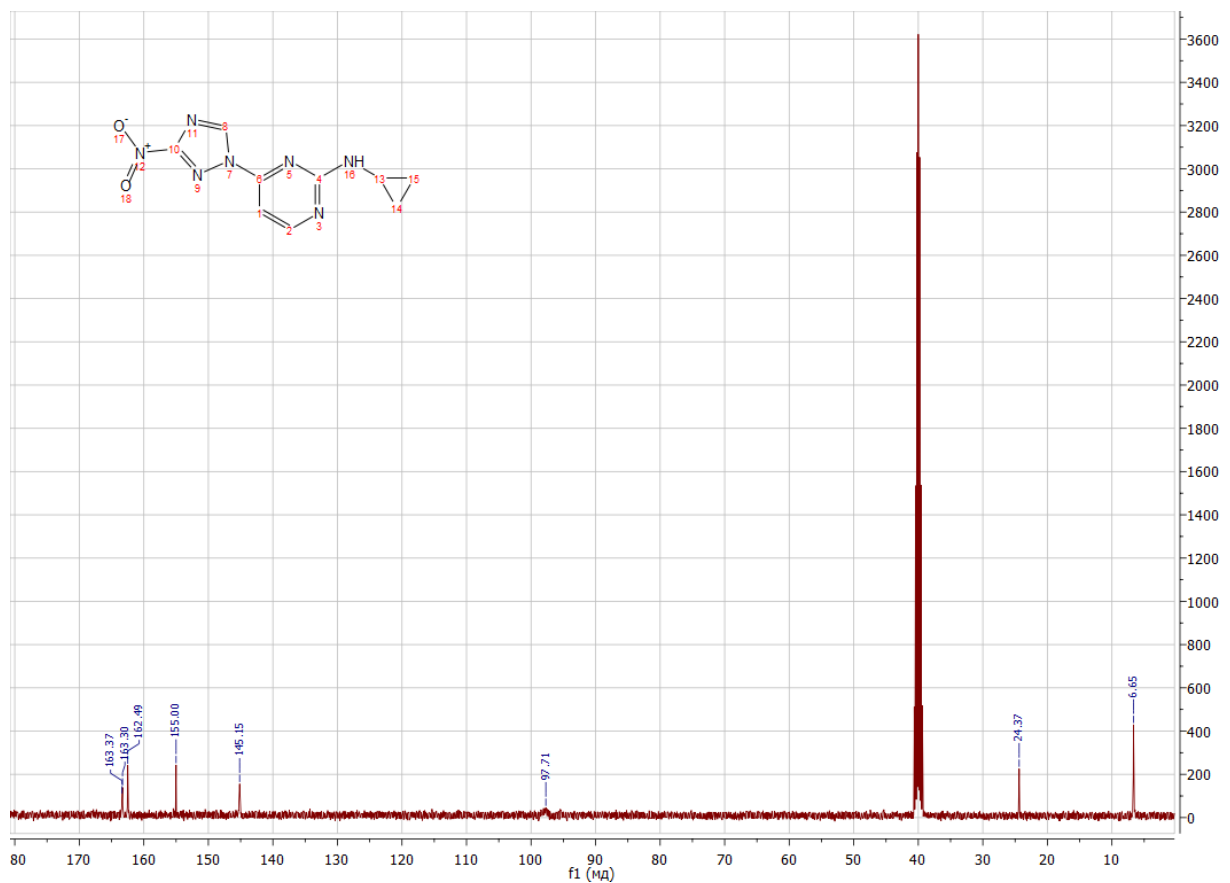

# <sup>1</sup>H and <sup>13</sup>C NMR of *N*-isopropyl-4-(3-nitro-1*H*-1,2,4-triazol-1-yl)pyrimidin-2-amine (2o)

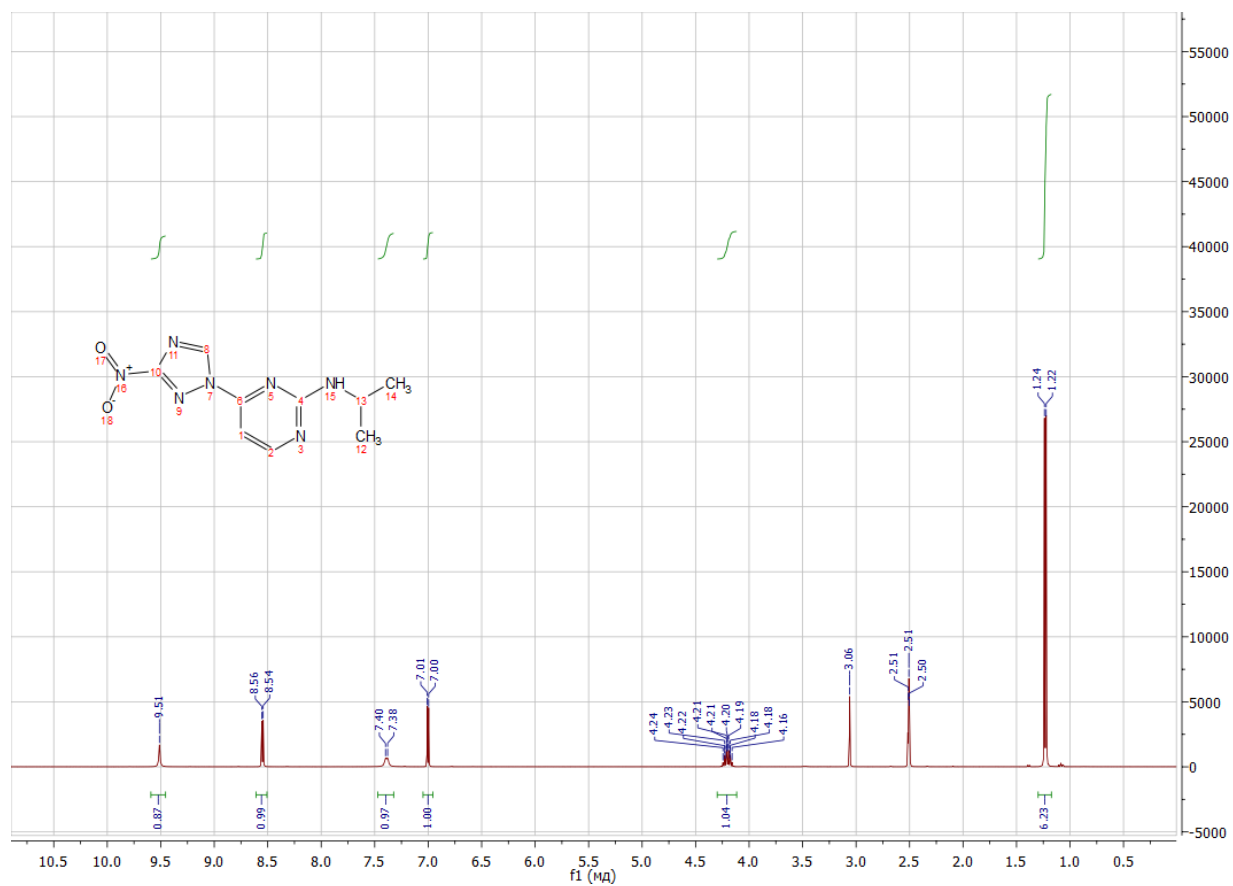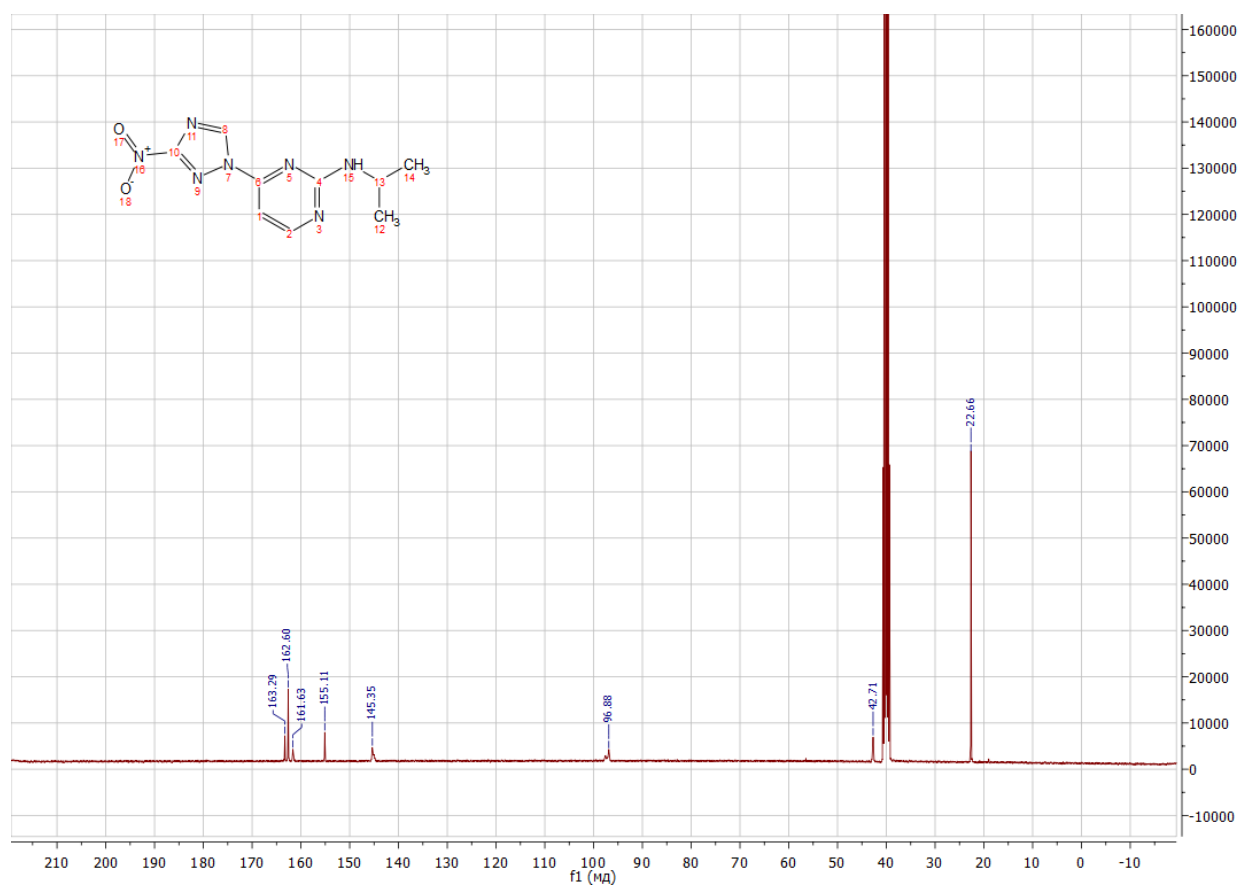

# <sup>1</sup>H and <sup>13</sup>C NMR of *N*-(3-(1*H*-imidazol-1-yl)propyl)-4-(3-nitro-1*H*-1,2,4-triazol-1-yl)pyrimidin-2-amine (2p)

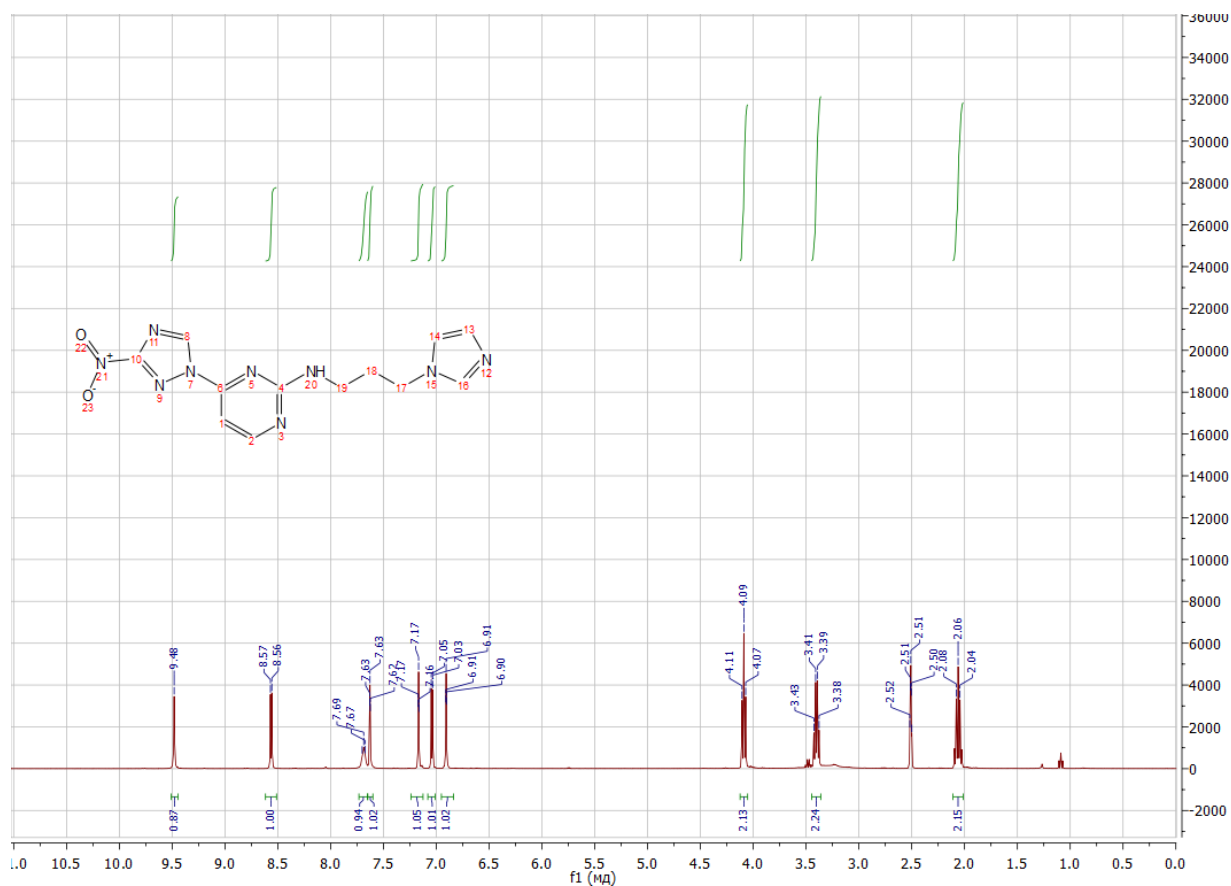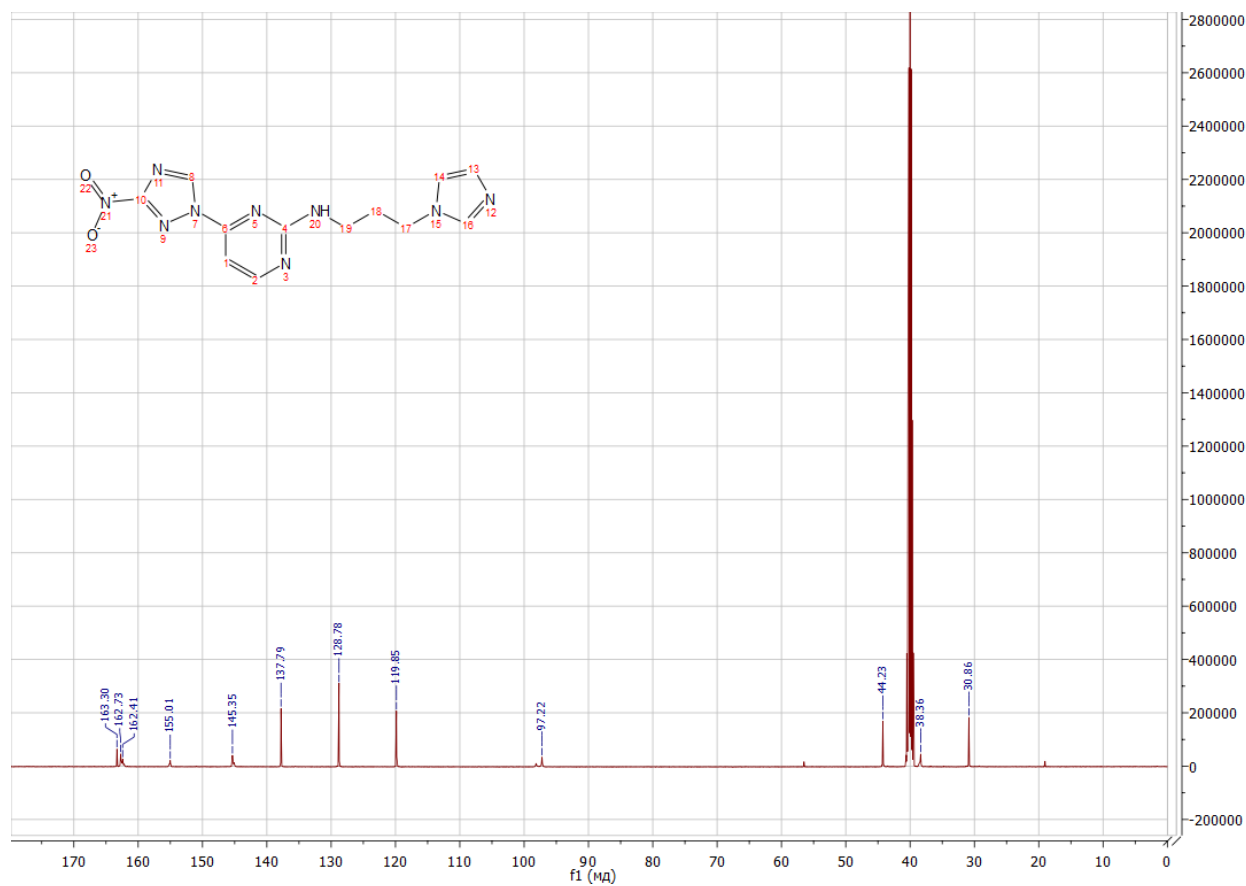

# <sup>1</sup>H and <sup>13</sup>C NMR of 4-(3-nitro-1H-1,2,4-triazol-1-yl)-2-(pyrrolidin-1-yl)pyrimidine (2q)

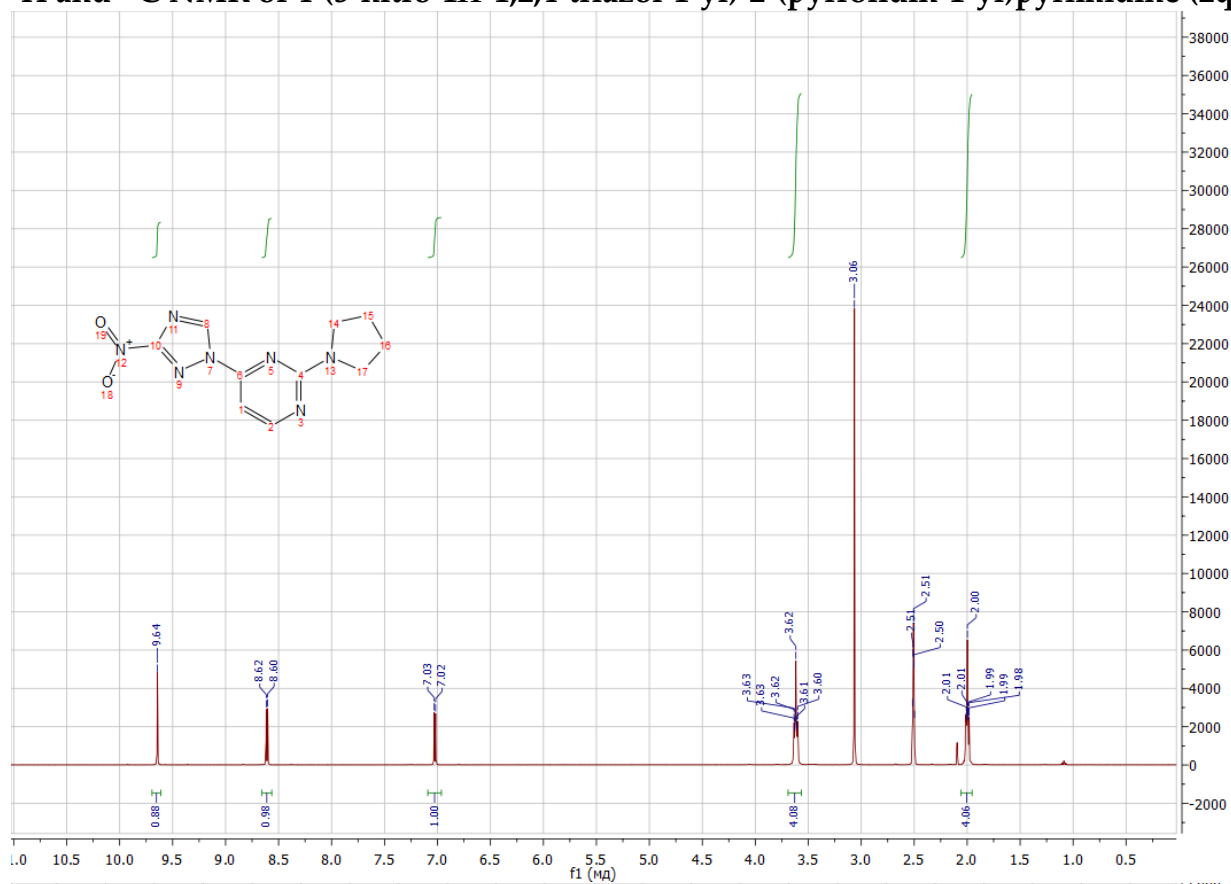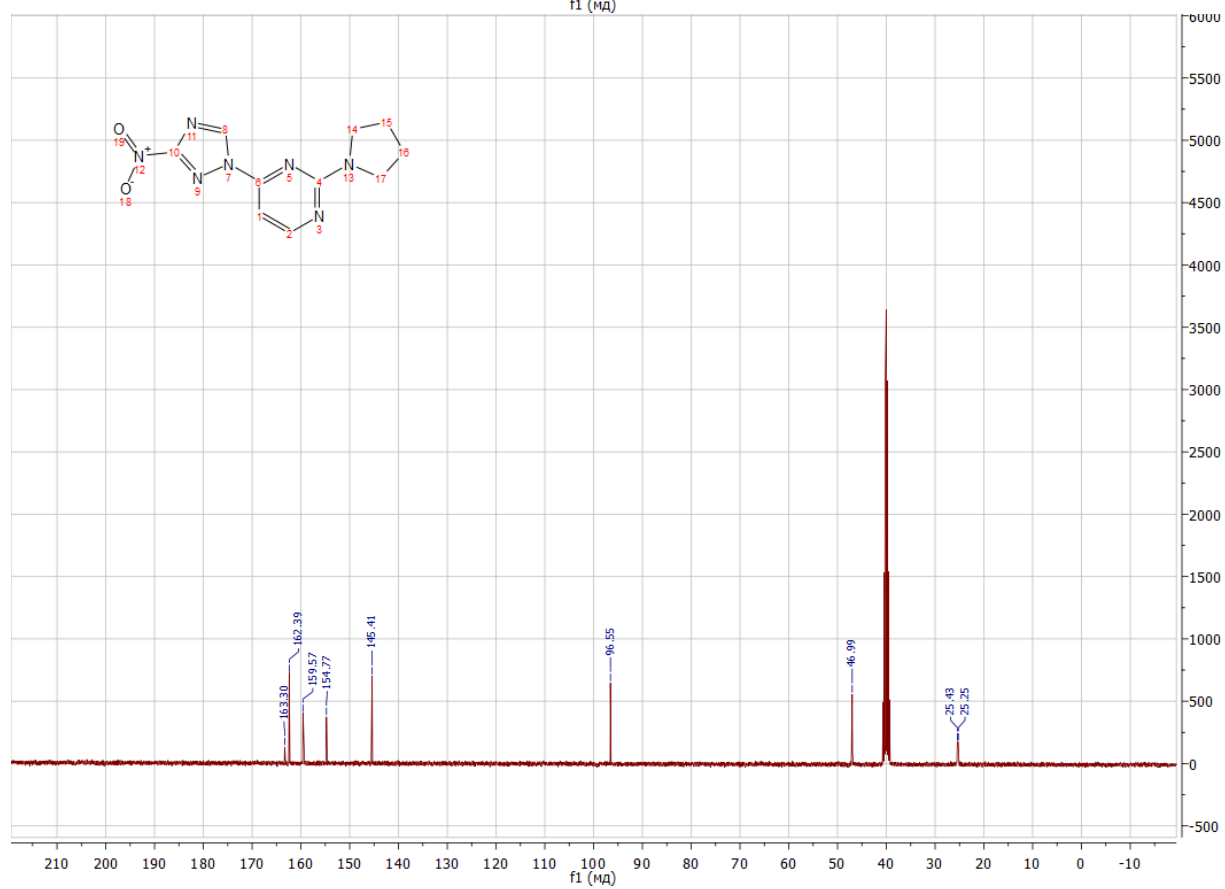

# <sup>1</sup>H and <sup>13</sup>C NMR of 4-(3-nitro-1*H*-1,2,4-triazol-1-yl)-*N*-propylpyrimidin-2-amine (2r)

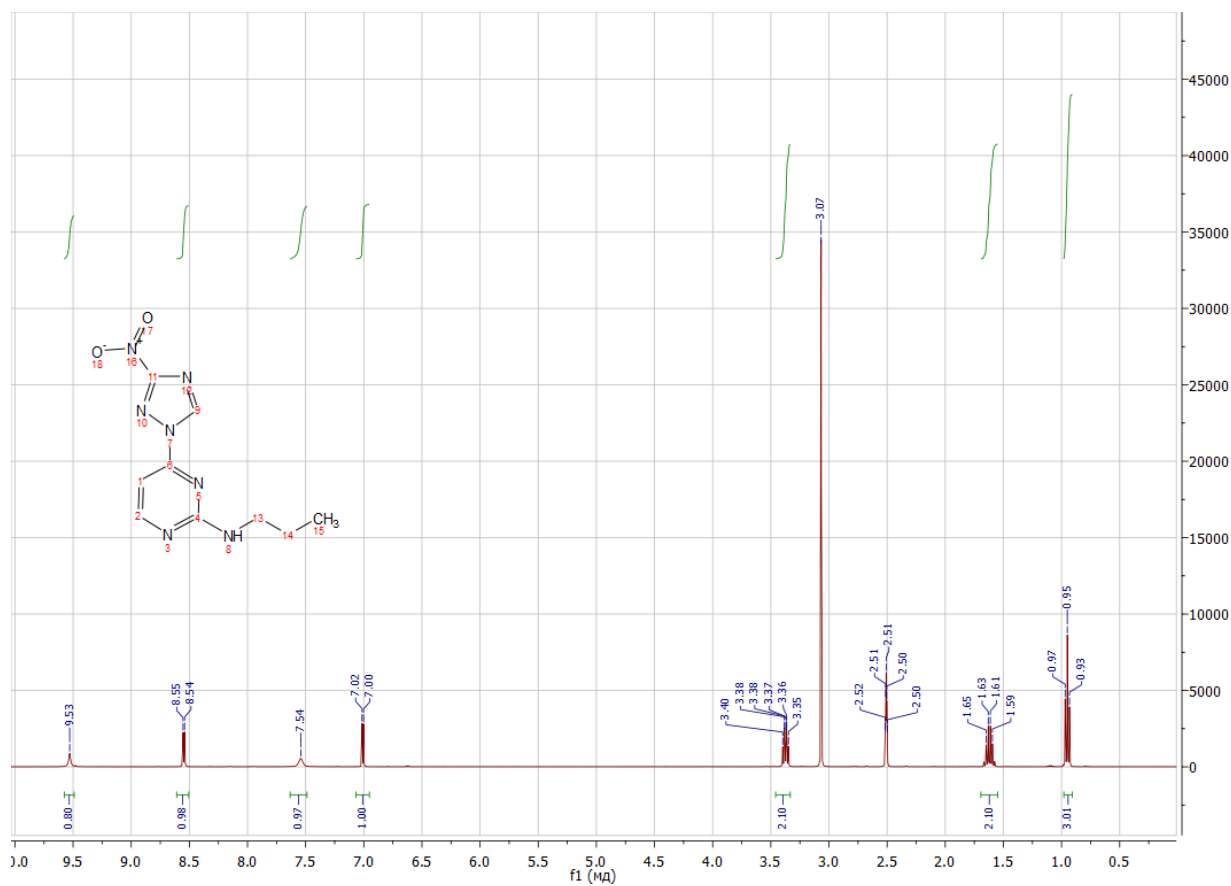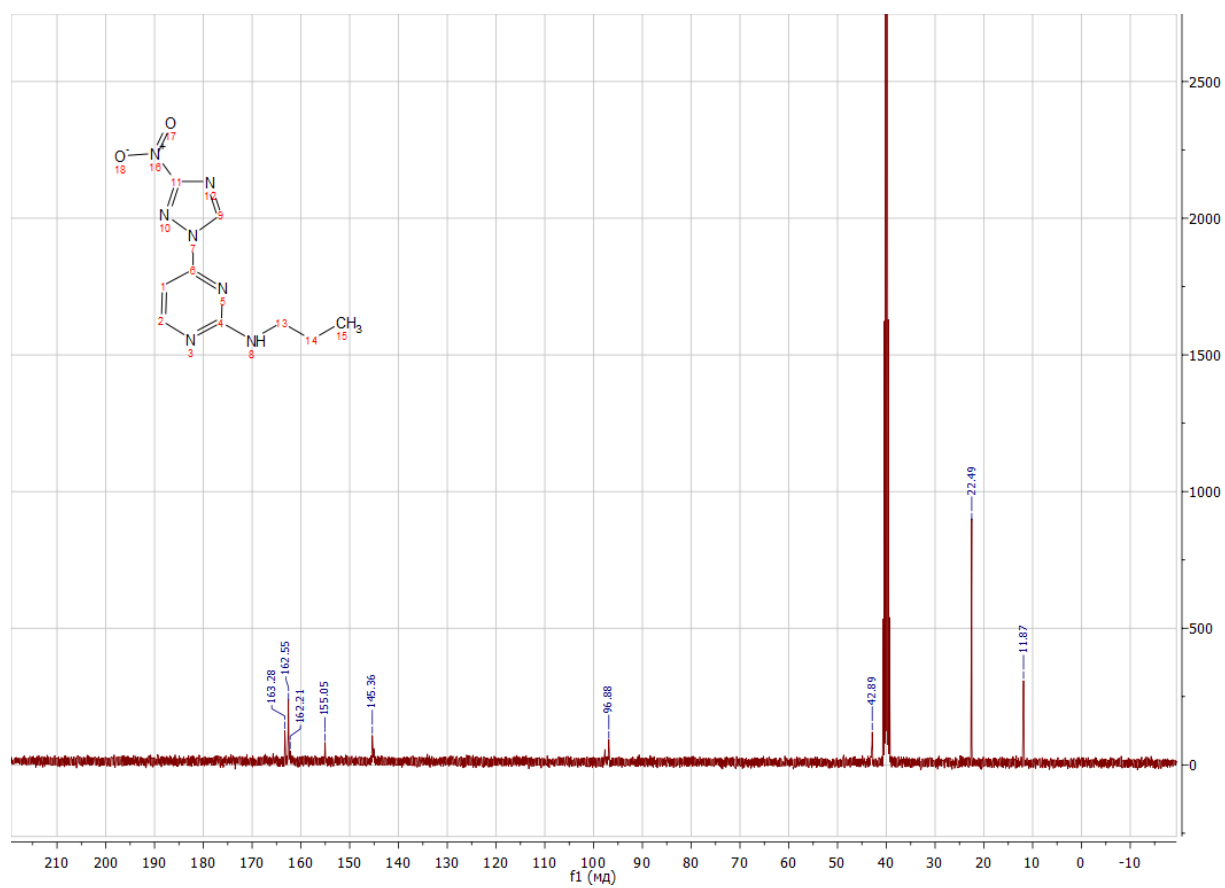

# <sup>1</sup>H and <sup>13</sup>C NMR of *N*-(4-methoxybenzyl)-4-(3-nitro-1*H*-1,2,4-triazol-1-yl)pyrimidin-2-amine (2s)

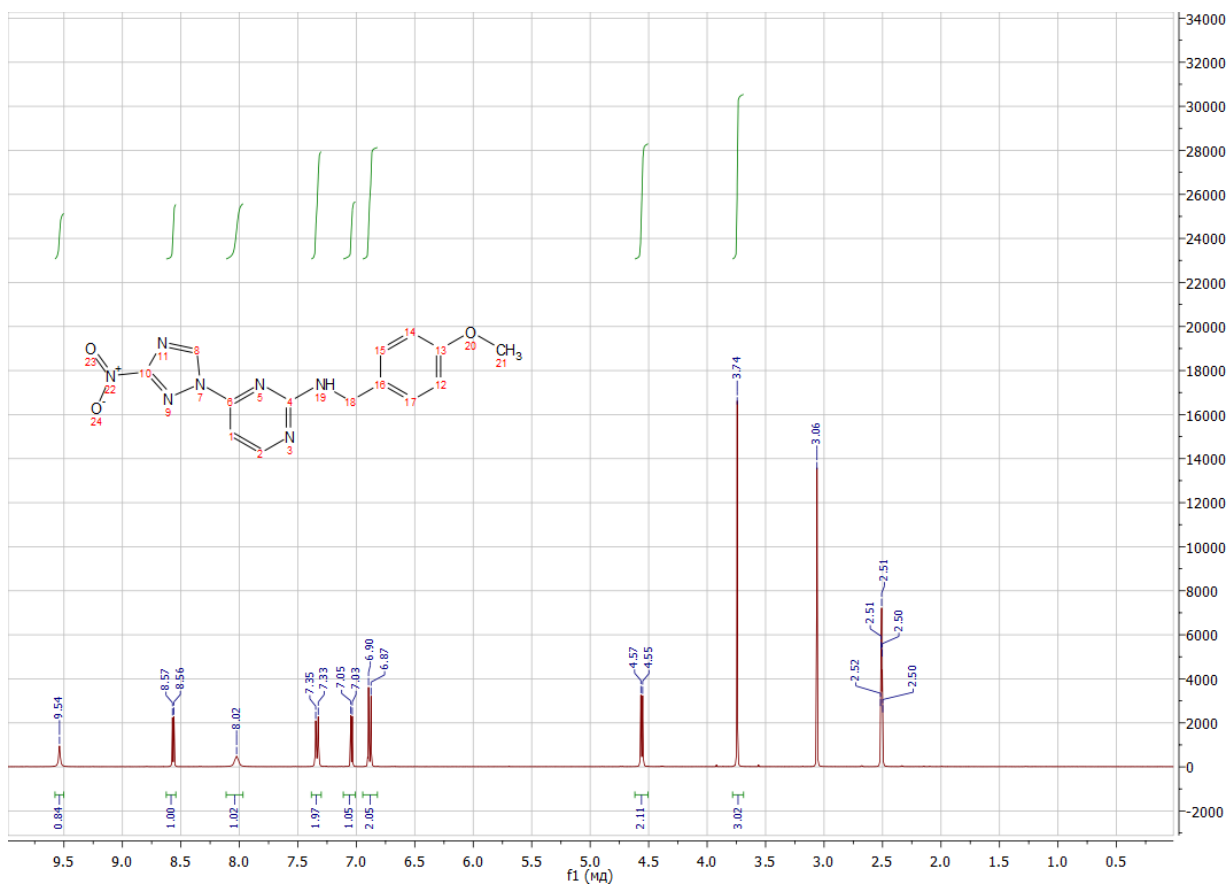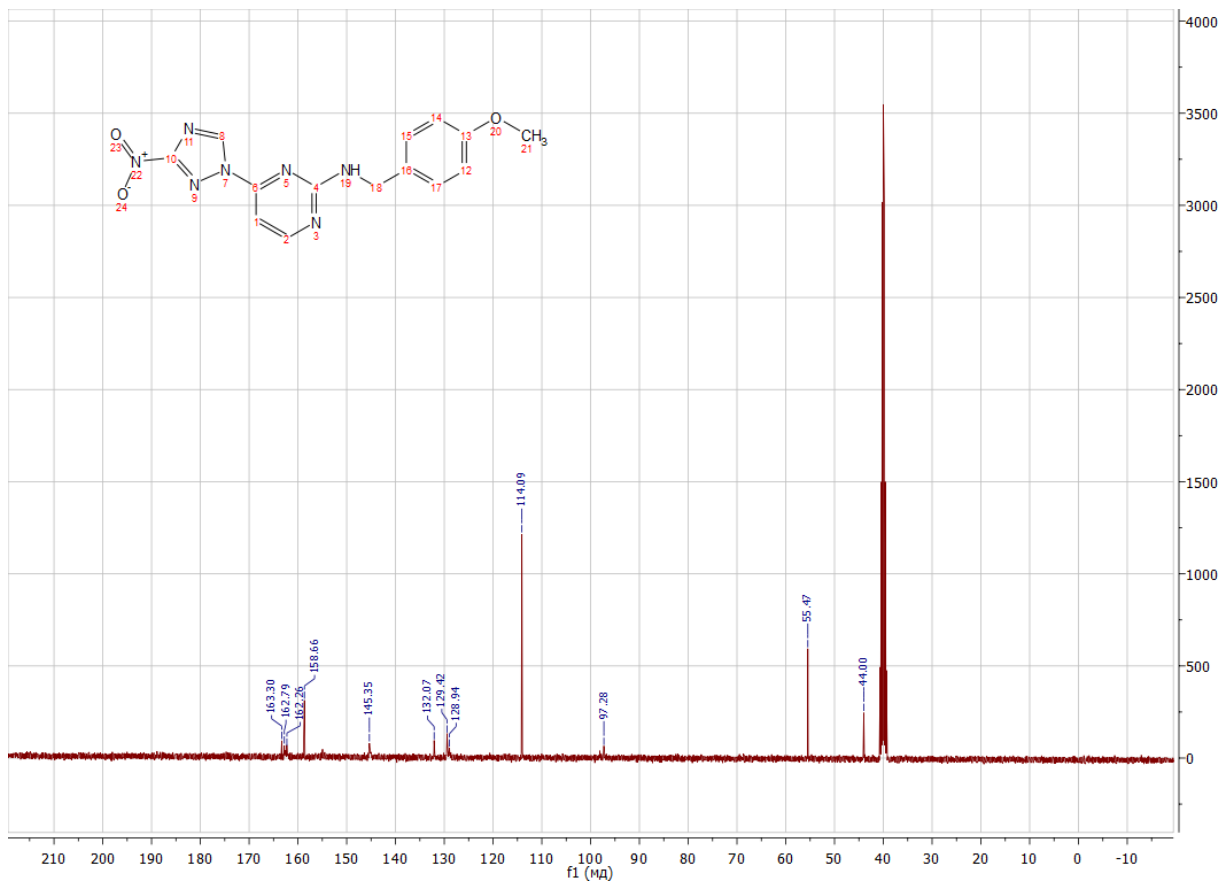

Supplement: antibiotics-09-00666-s001.pdf [file antibiotics-09-00666-s001.pdf]
